# Supplementary material for: Caffeic acid and diabetic neuropathy: Investigating protective effects and insulin-like growth factor 1 (IGF-1)-related antioxidative and anti-inflammatory mechanisms in mice
Source: PubMed Central journal article supplement — Heliyon. 2024 Jun 6;10(12):e32623. doi: 10.1016/j.heliyon.2024.e32623 (PMC11225750; doi:10.1016/j.heliyon.2024.e32623), 2024-06-06
Supplement: mmc2.pdf [file mmc2.pdf]

**Figure 2G**

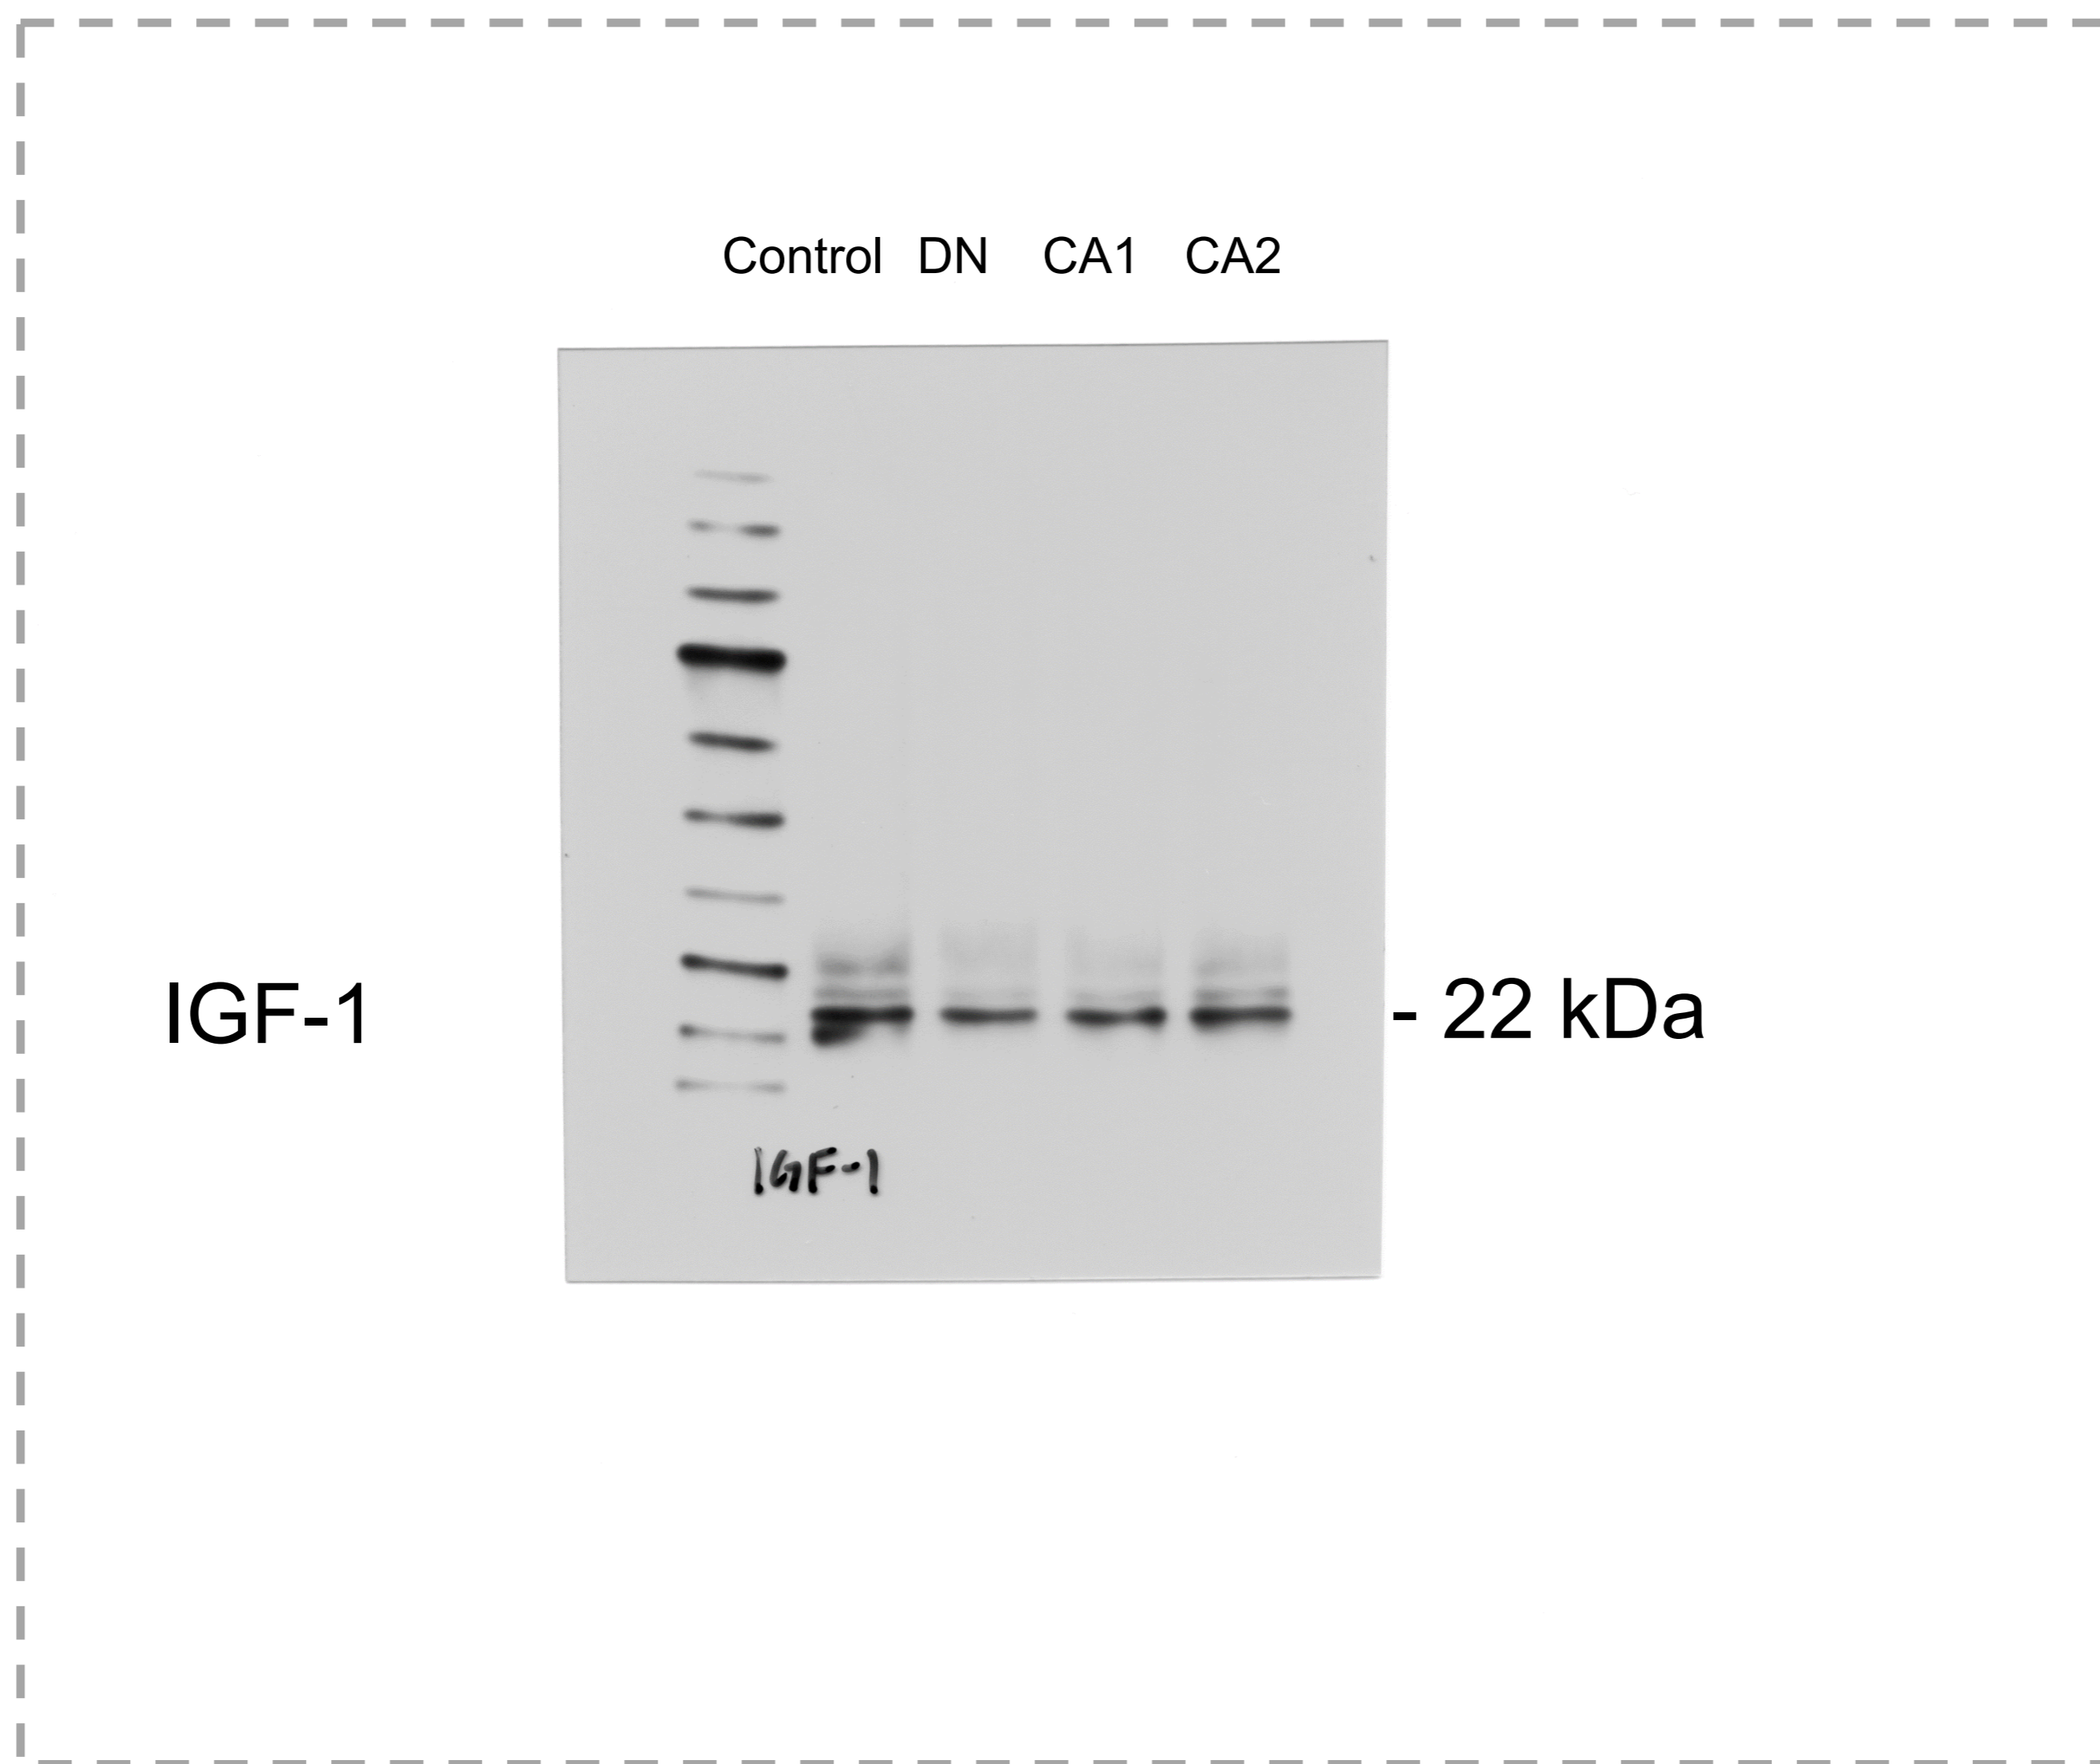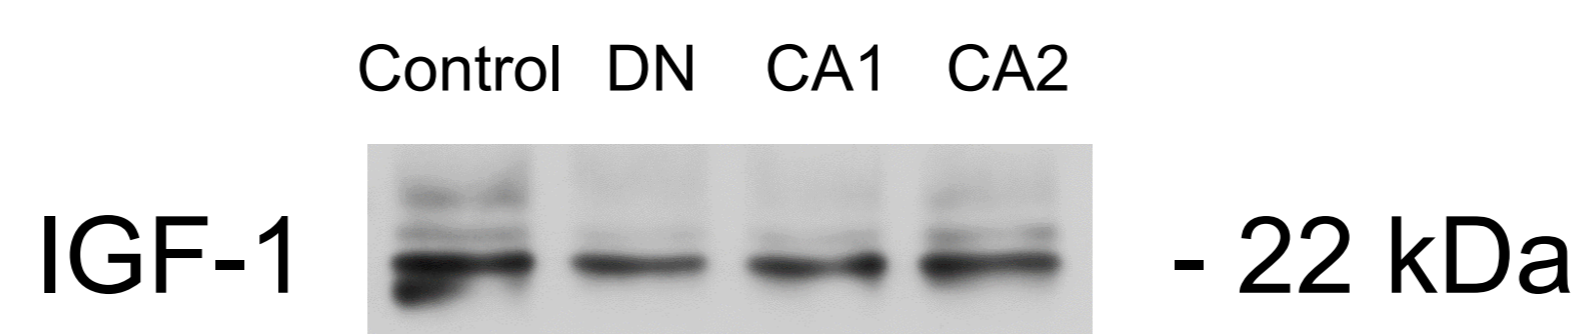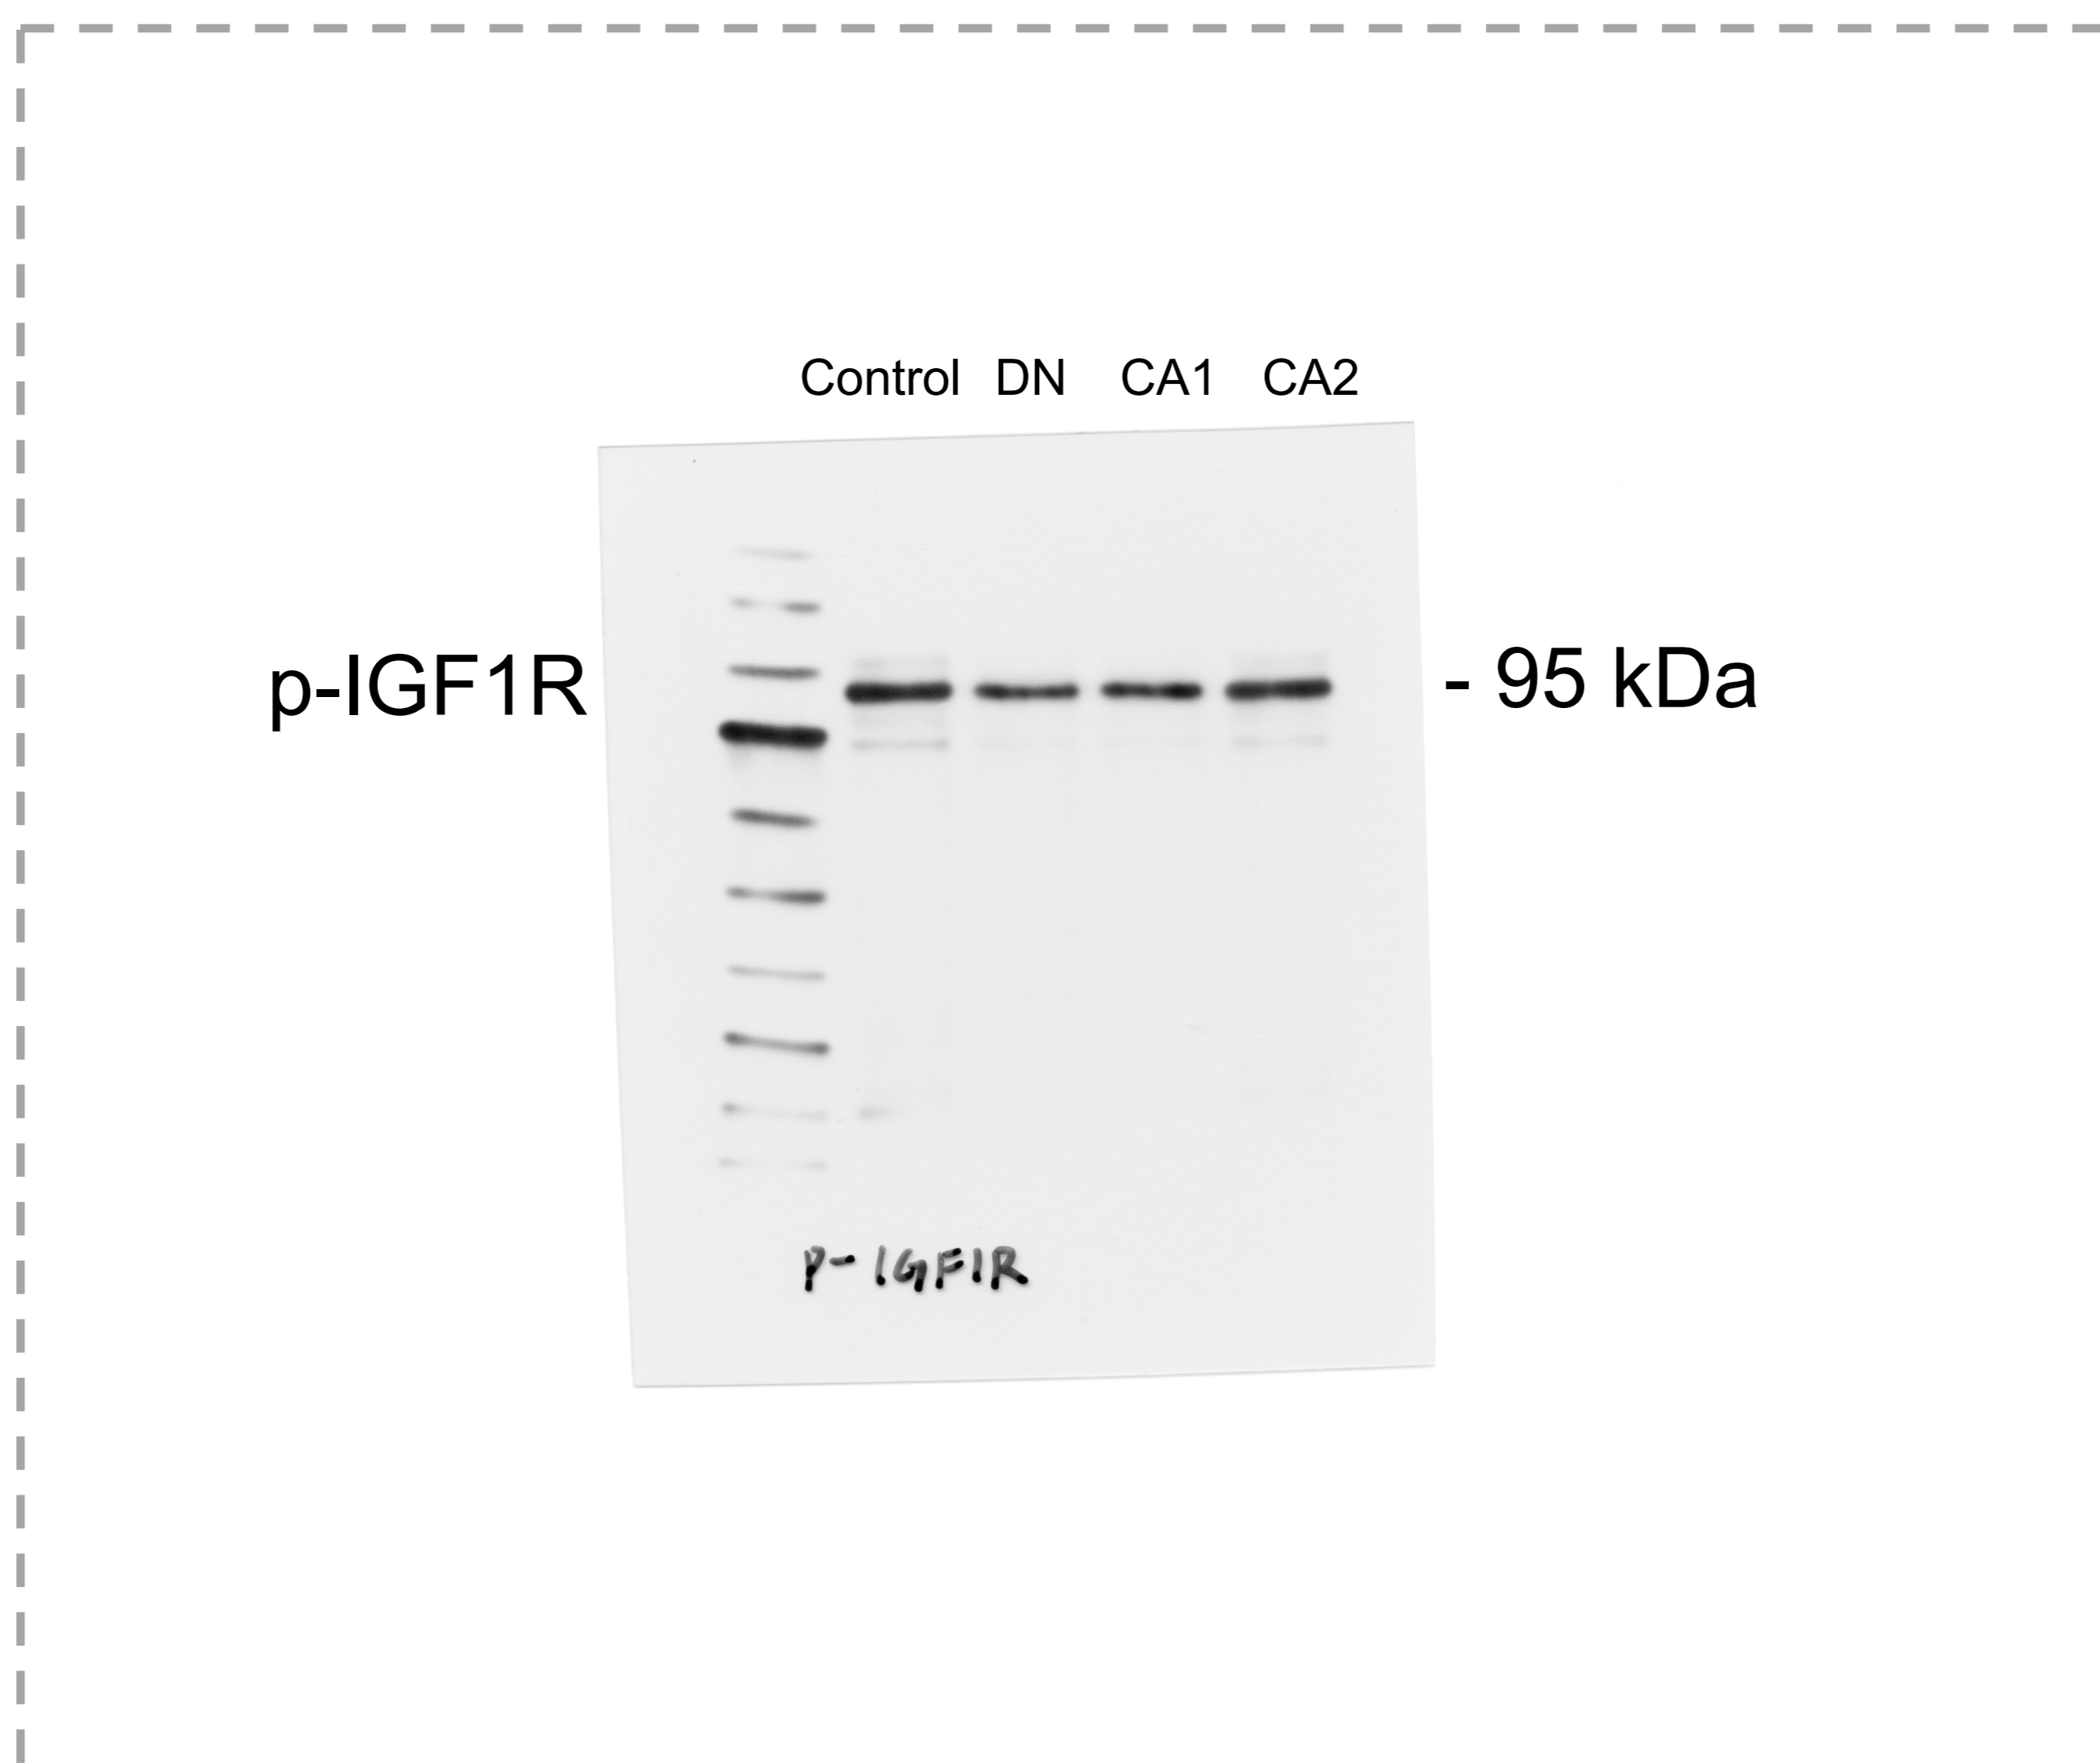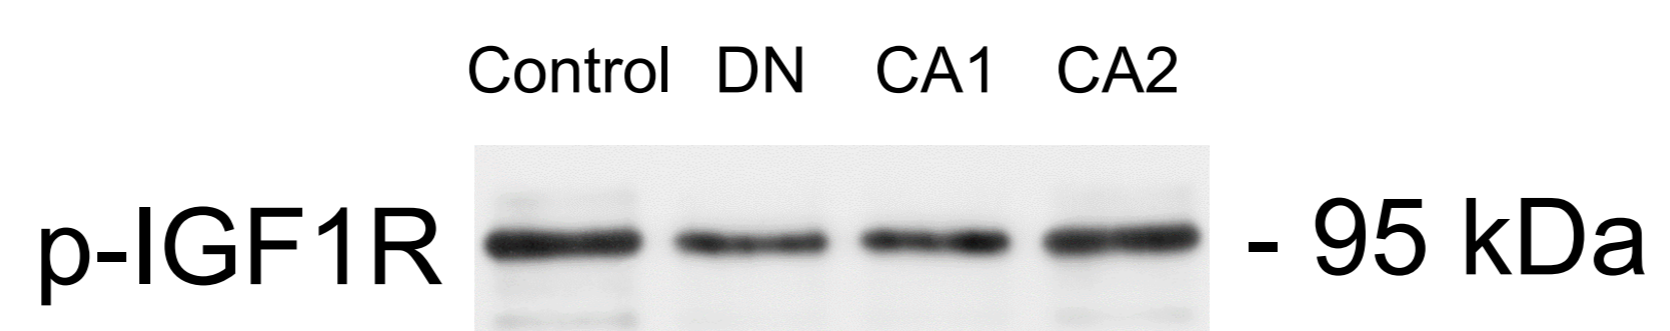

**Figure 2G**

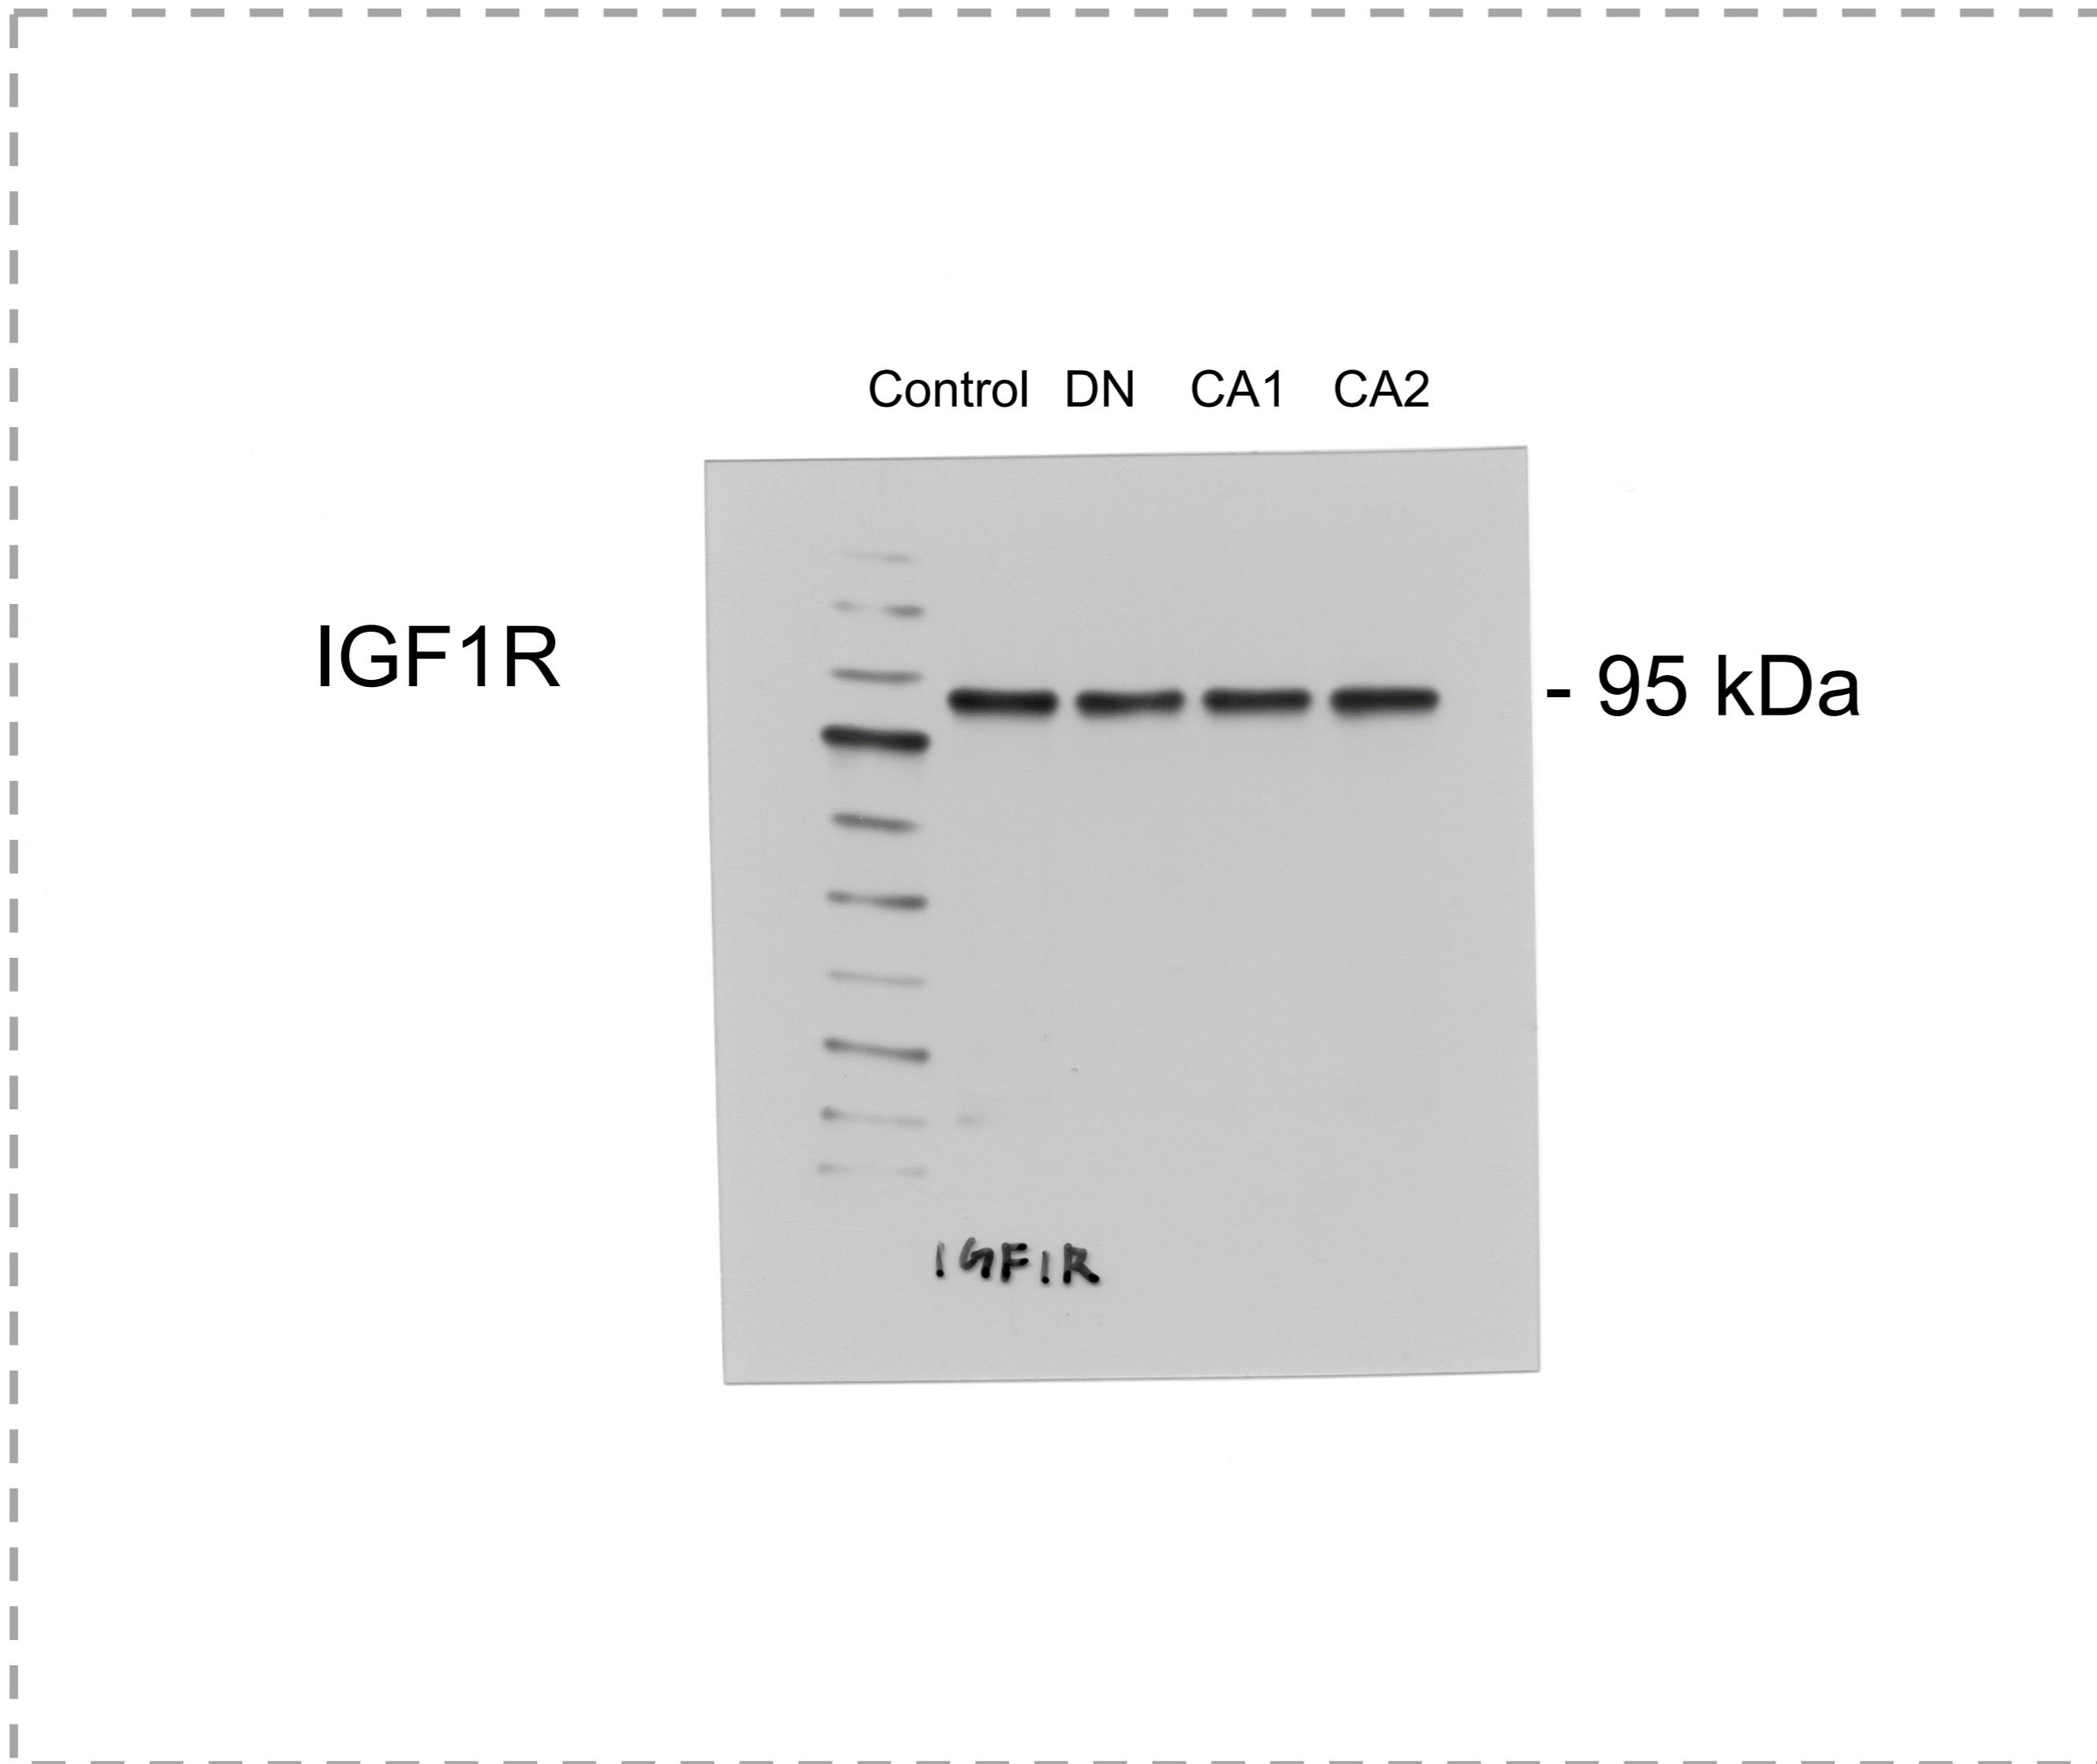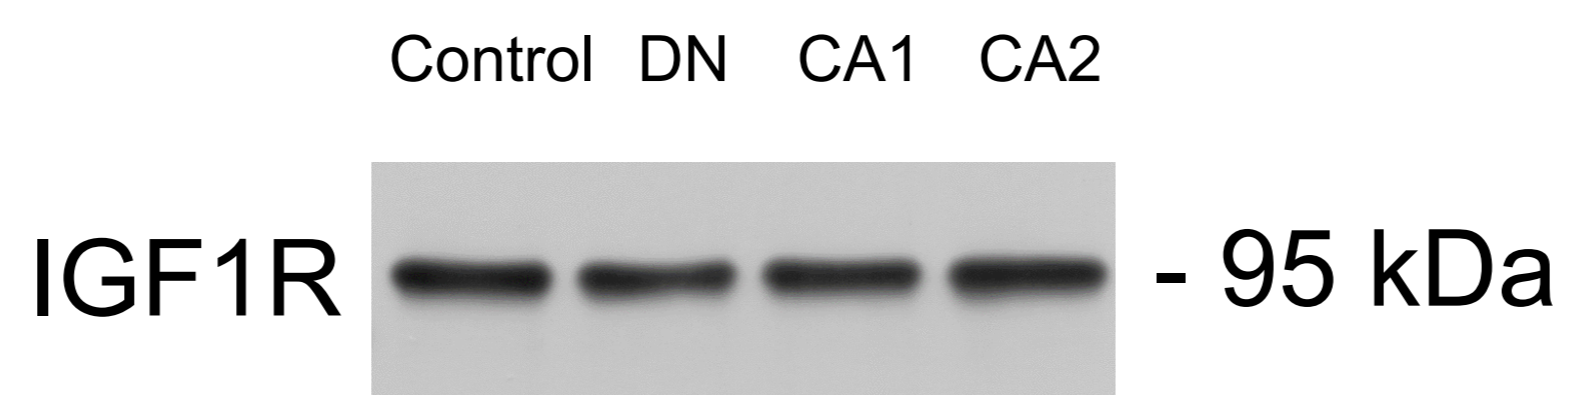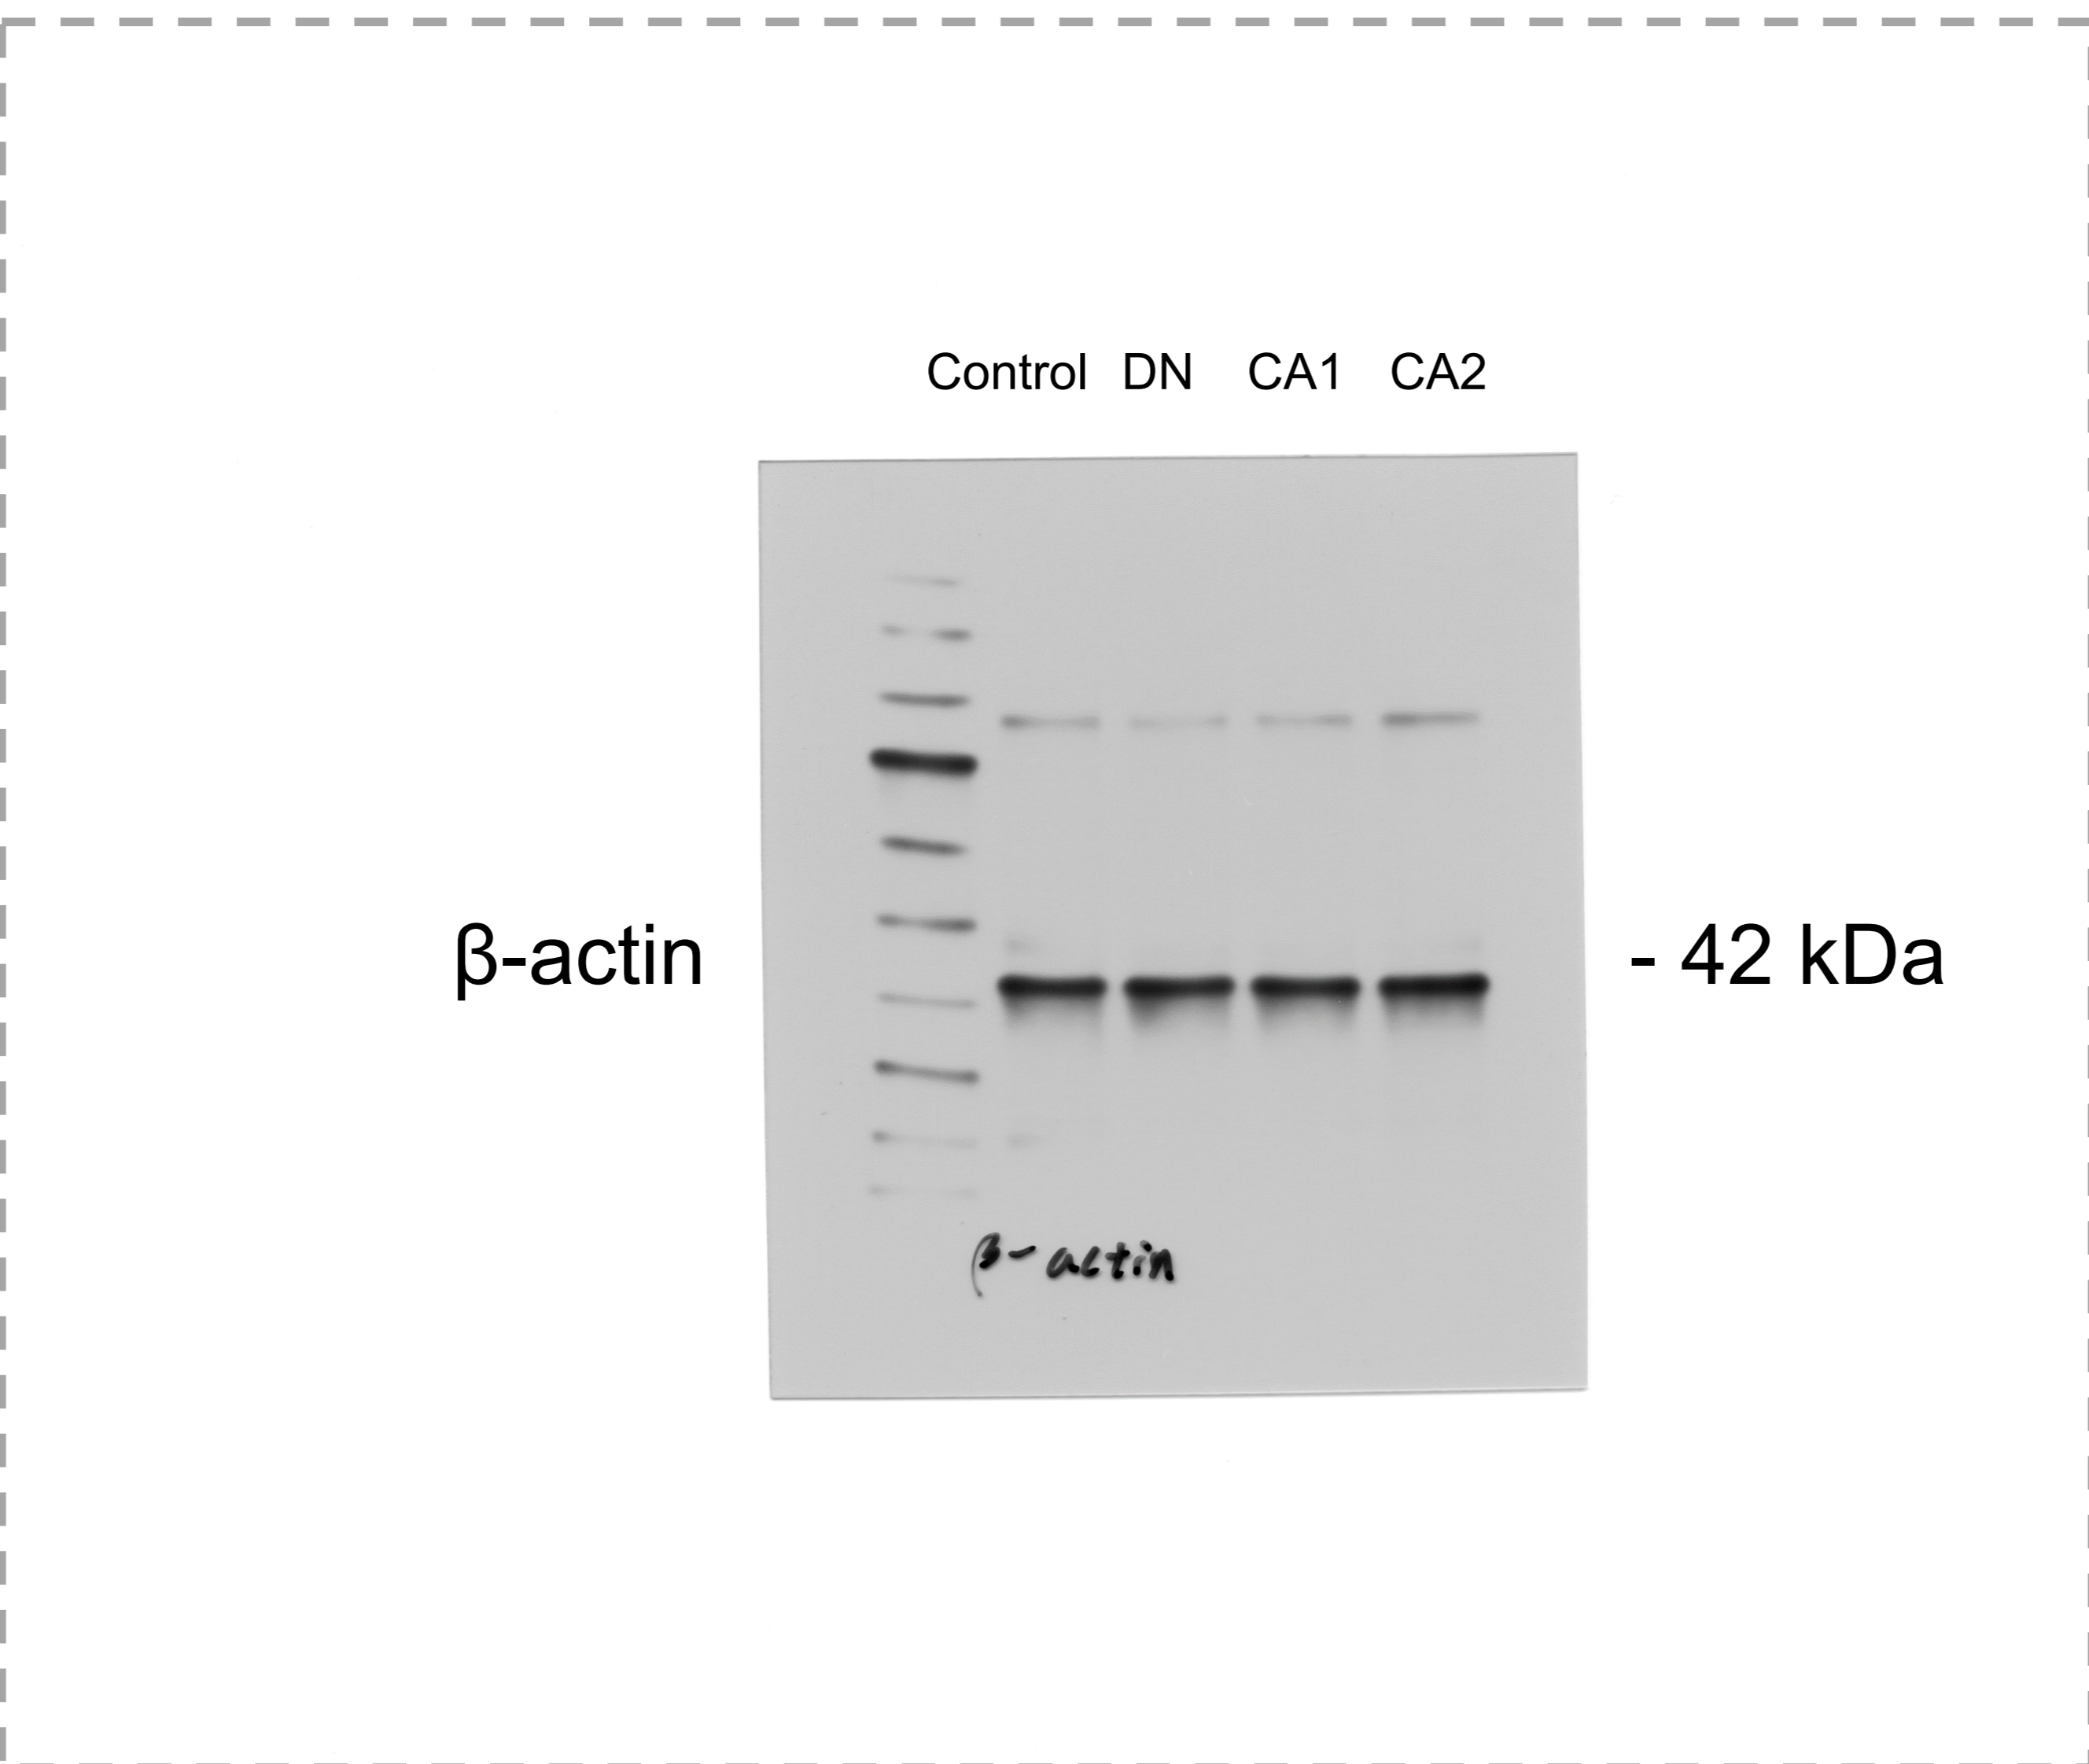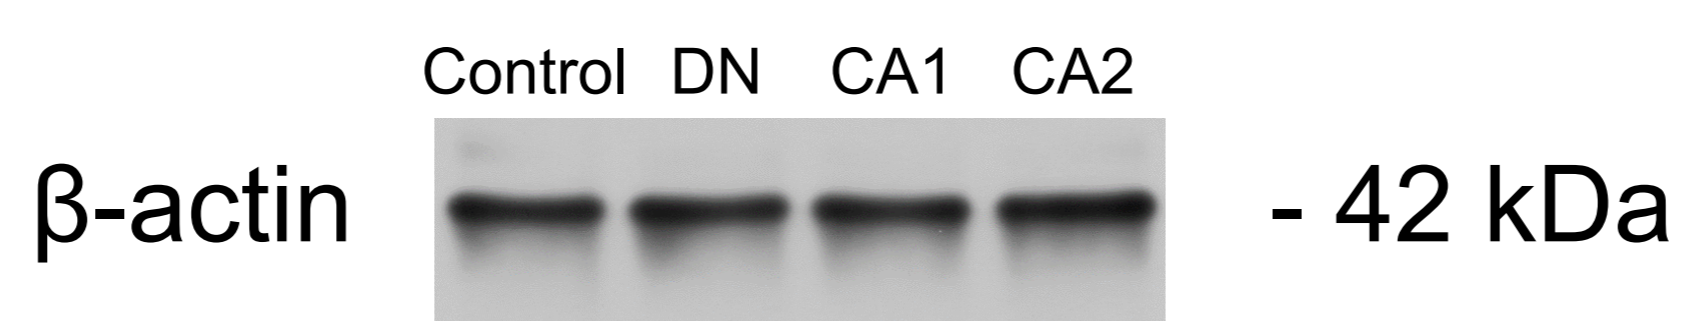

**Figure 3D**

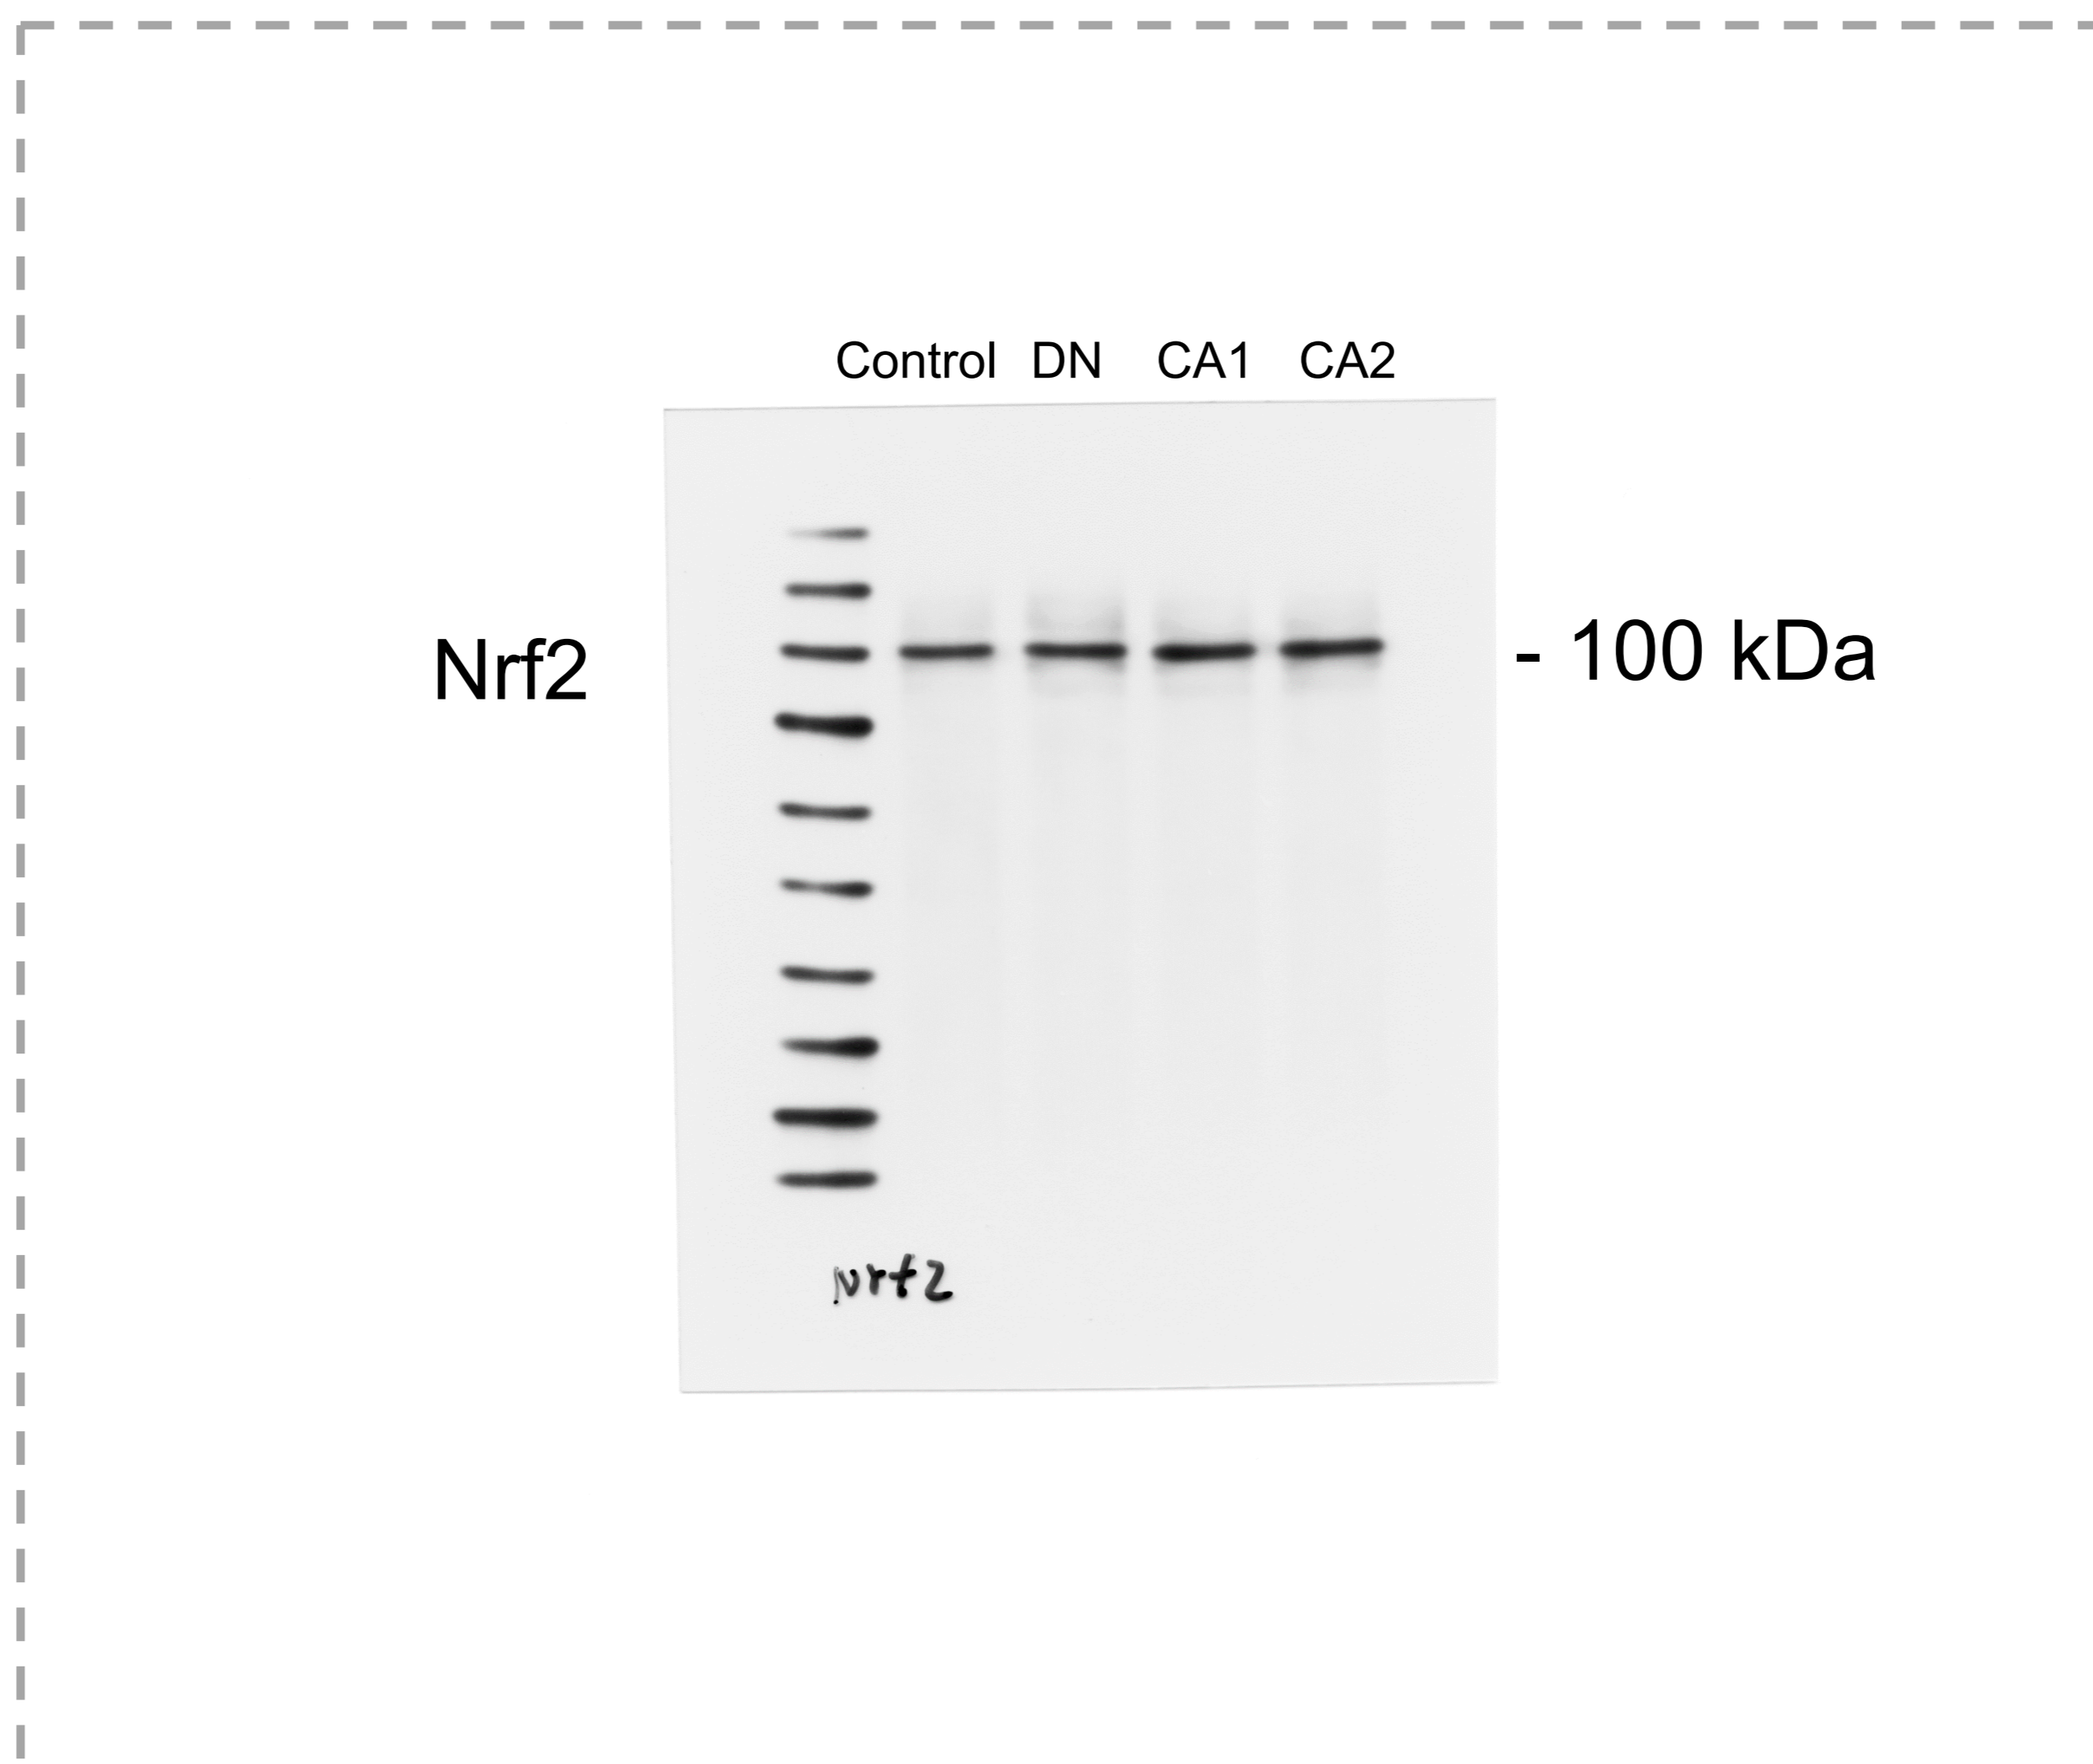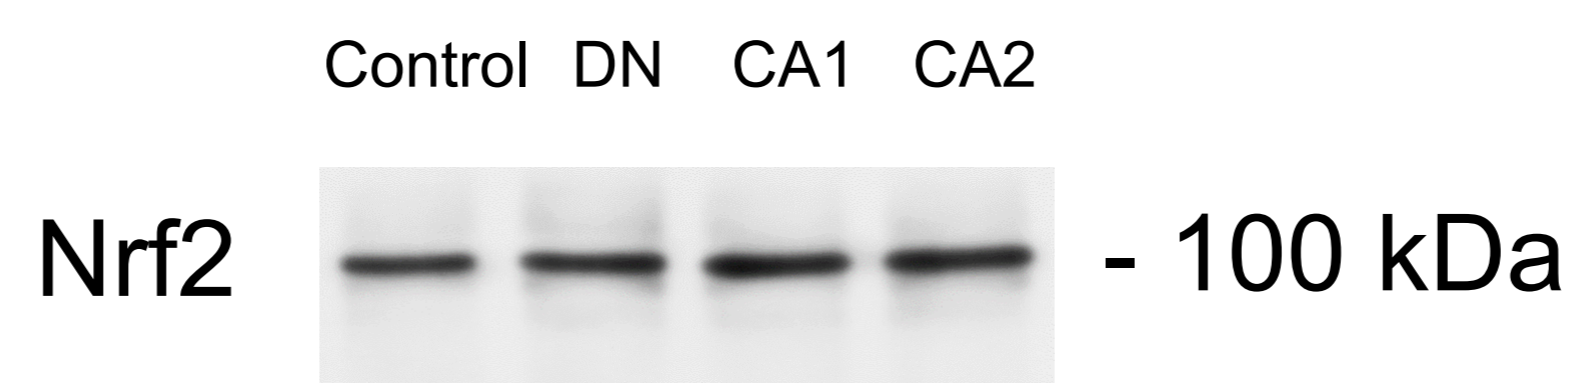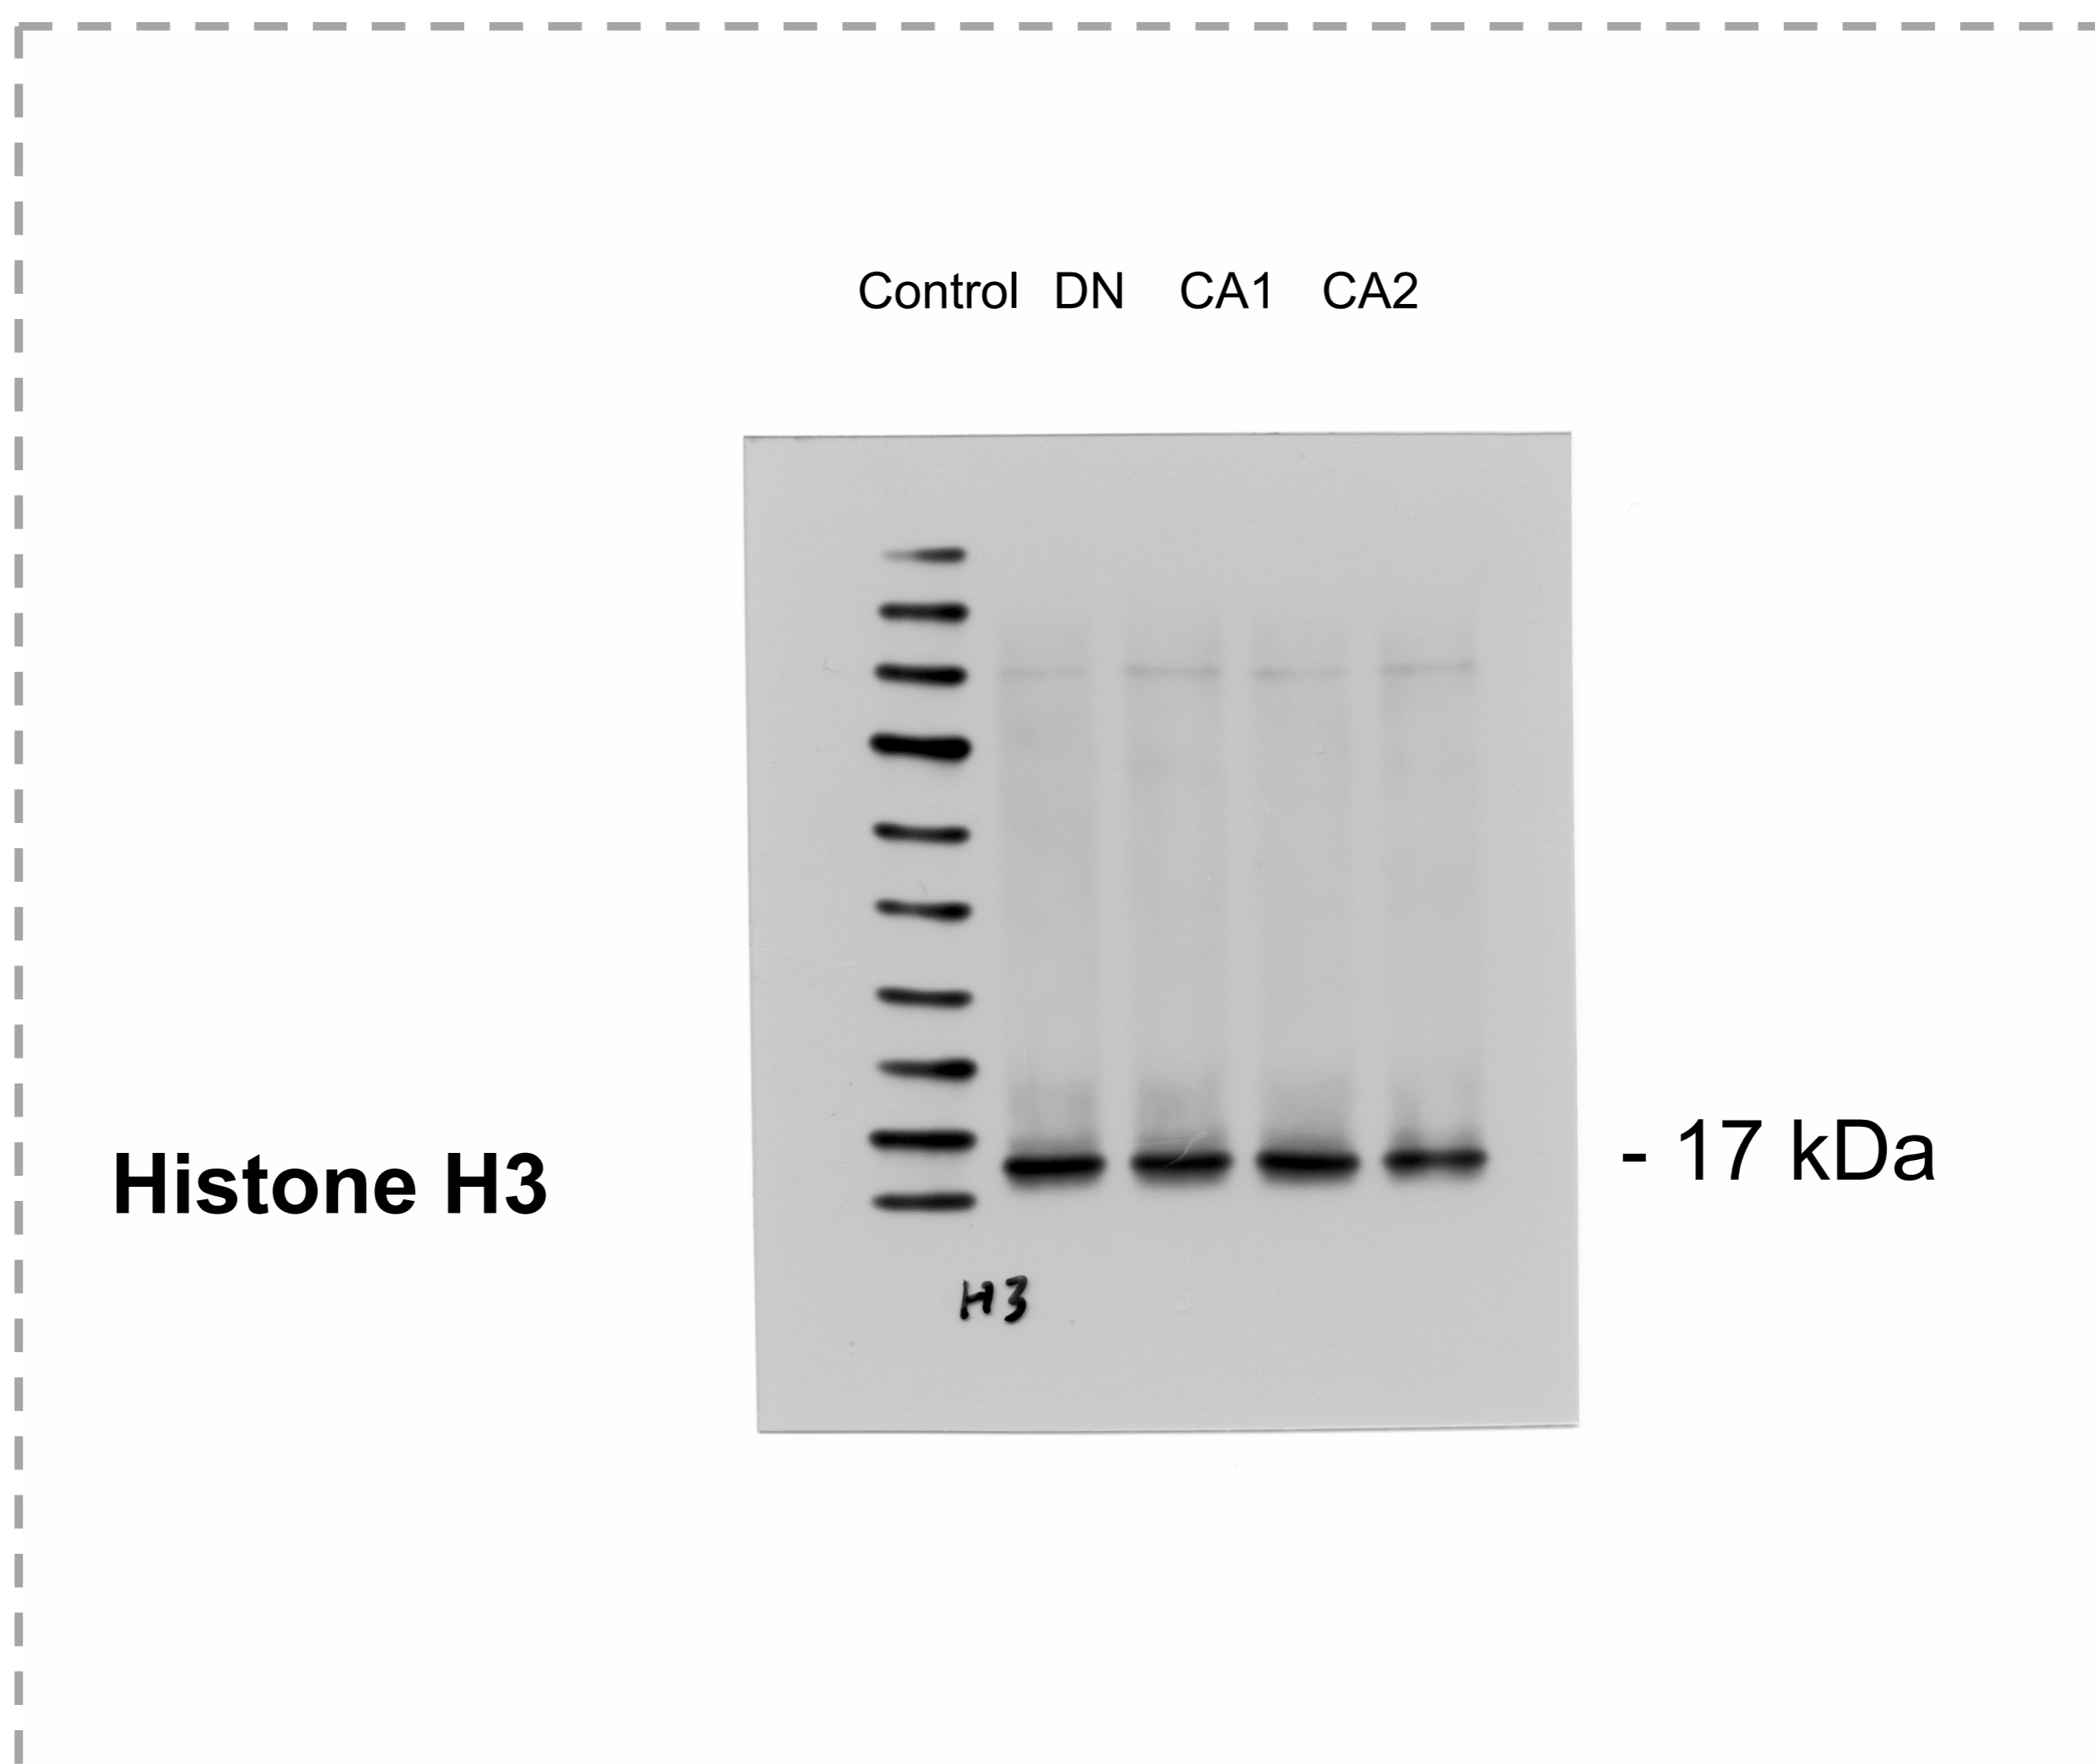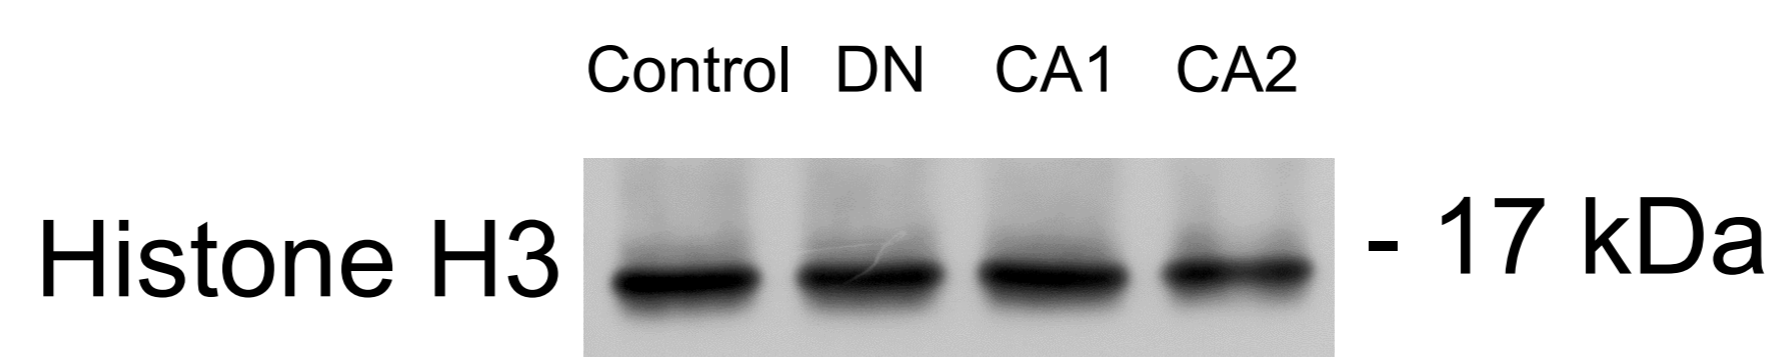

**Figure 4E**

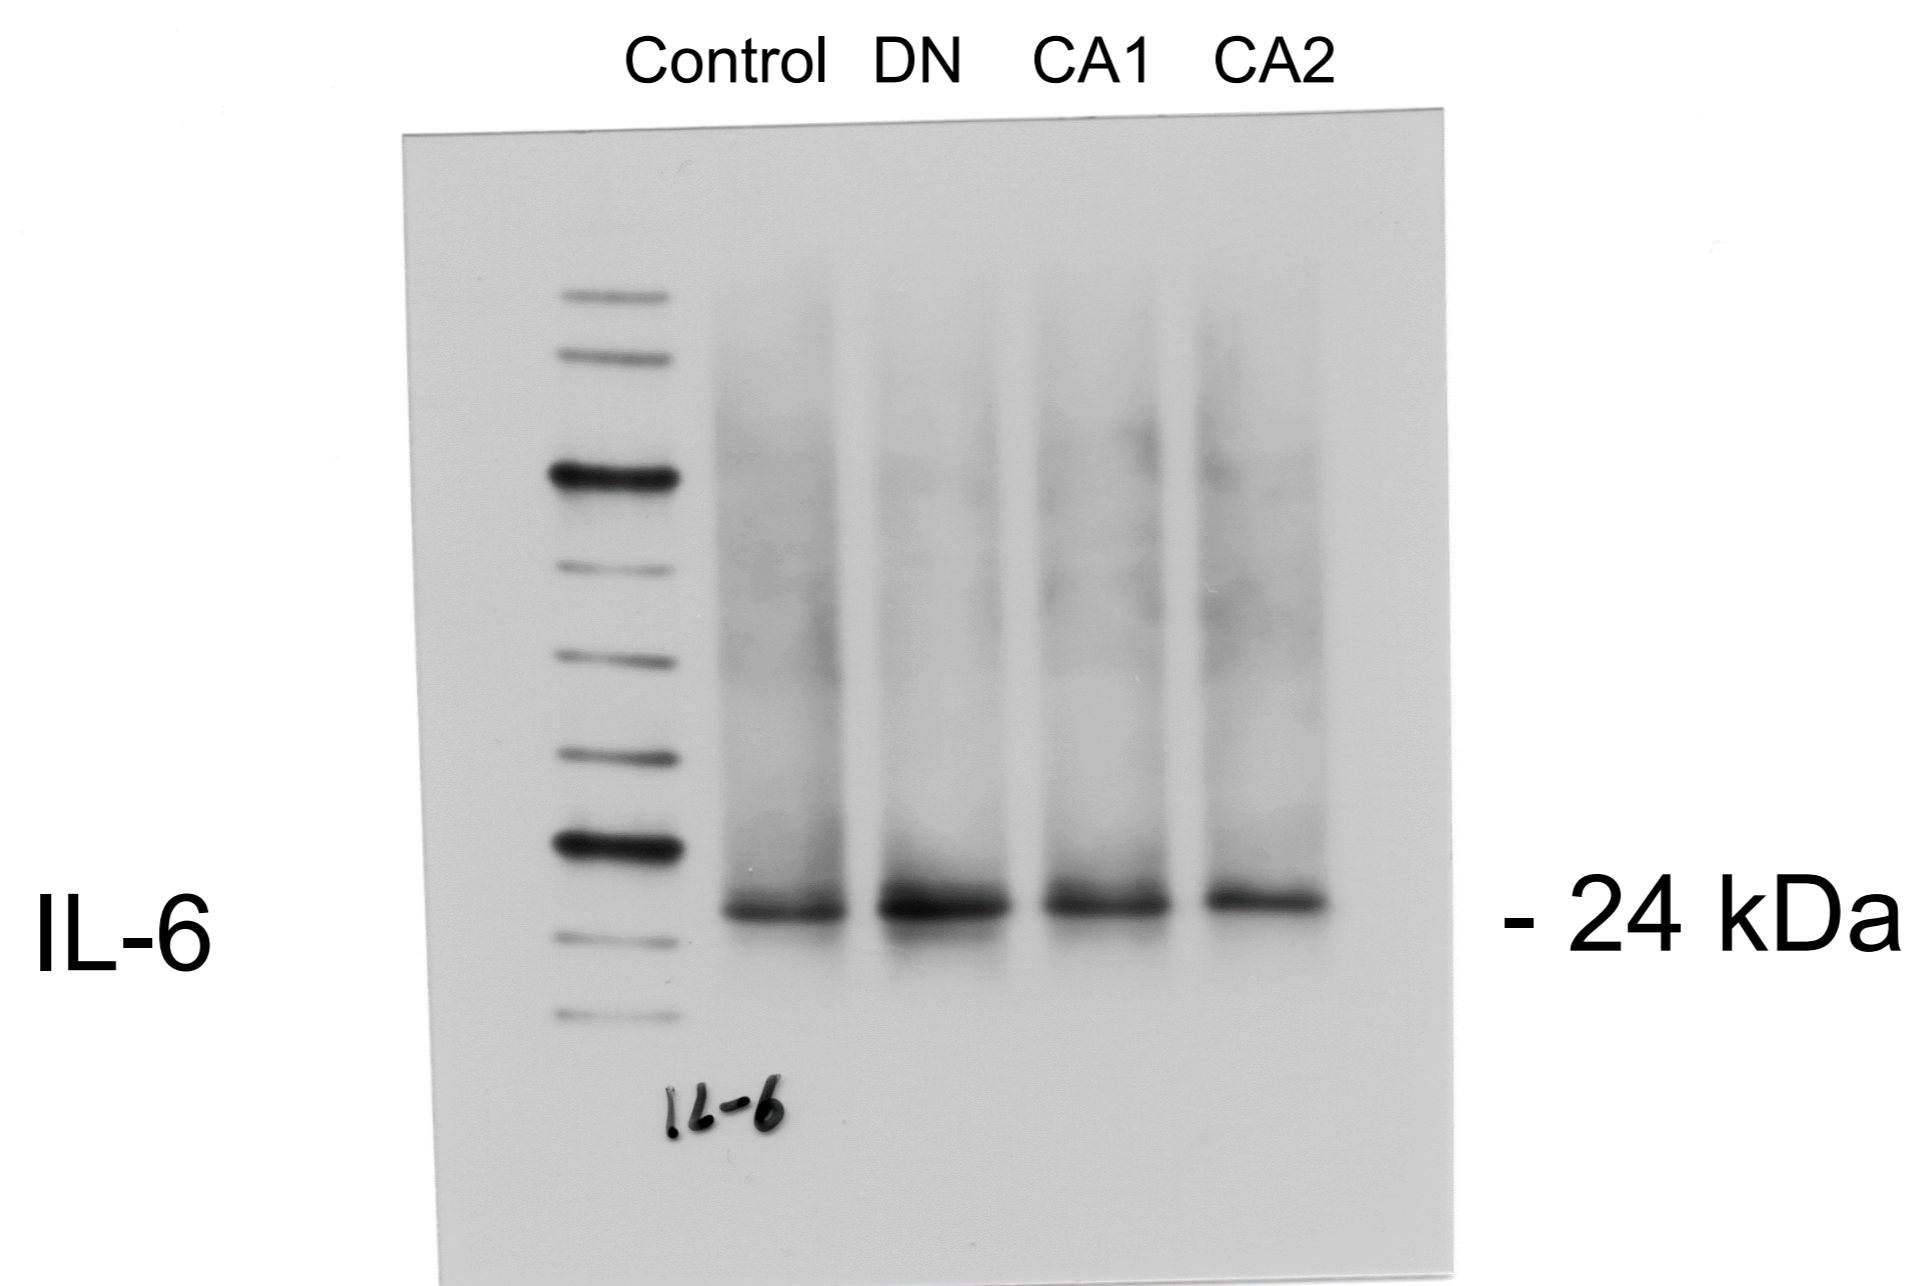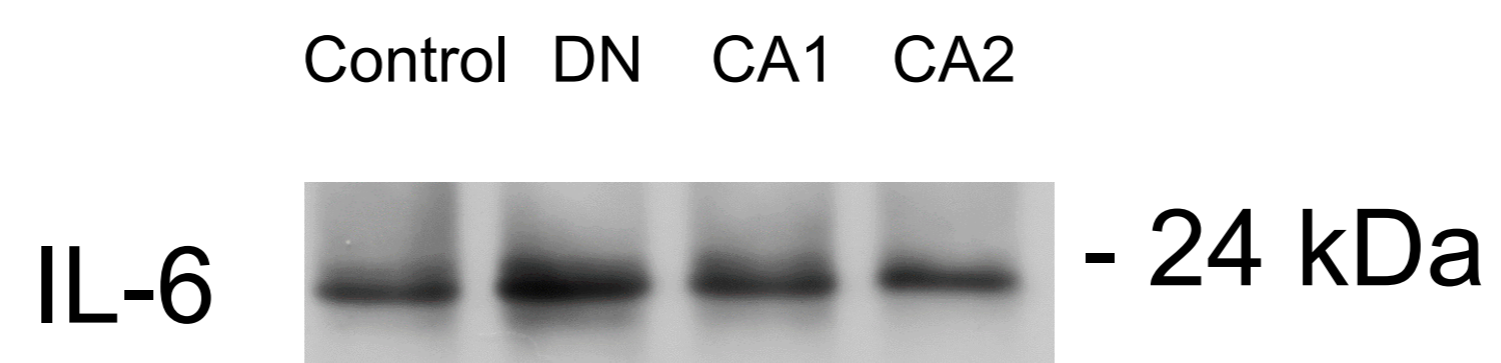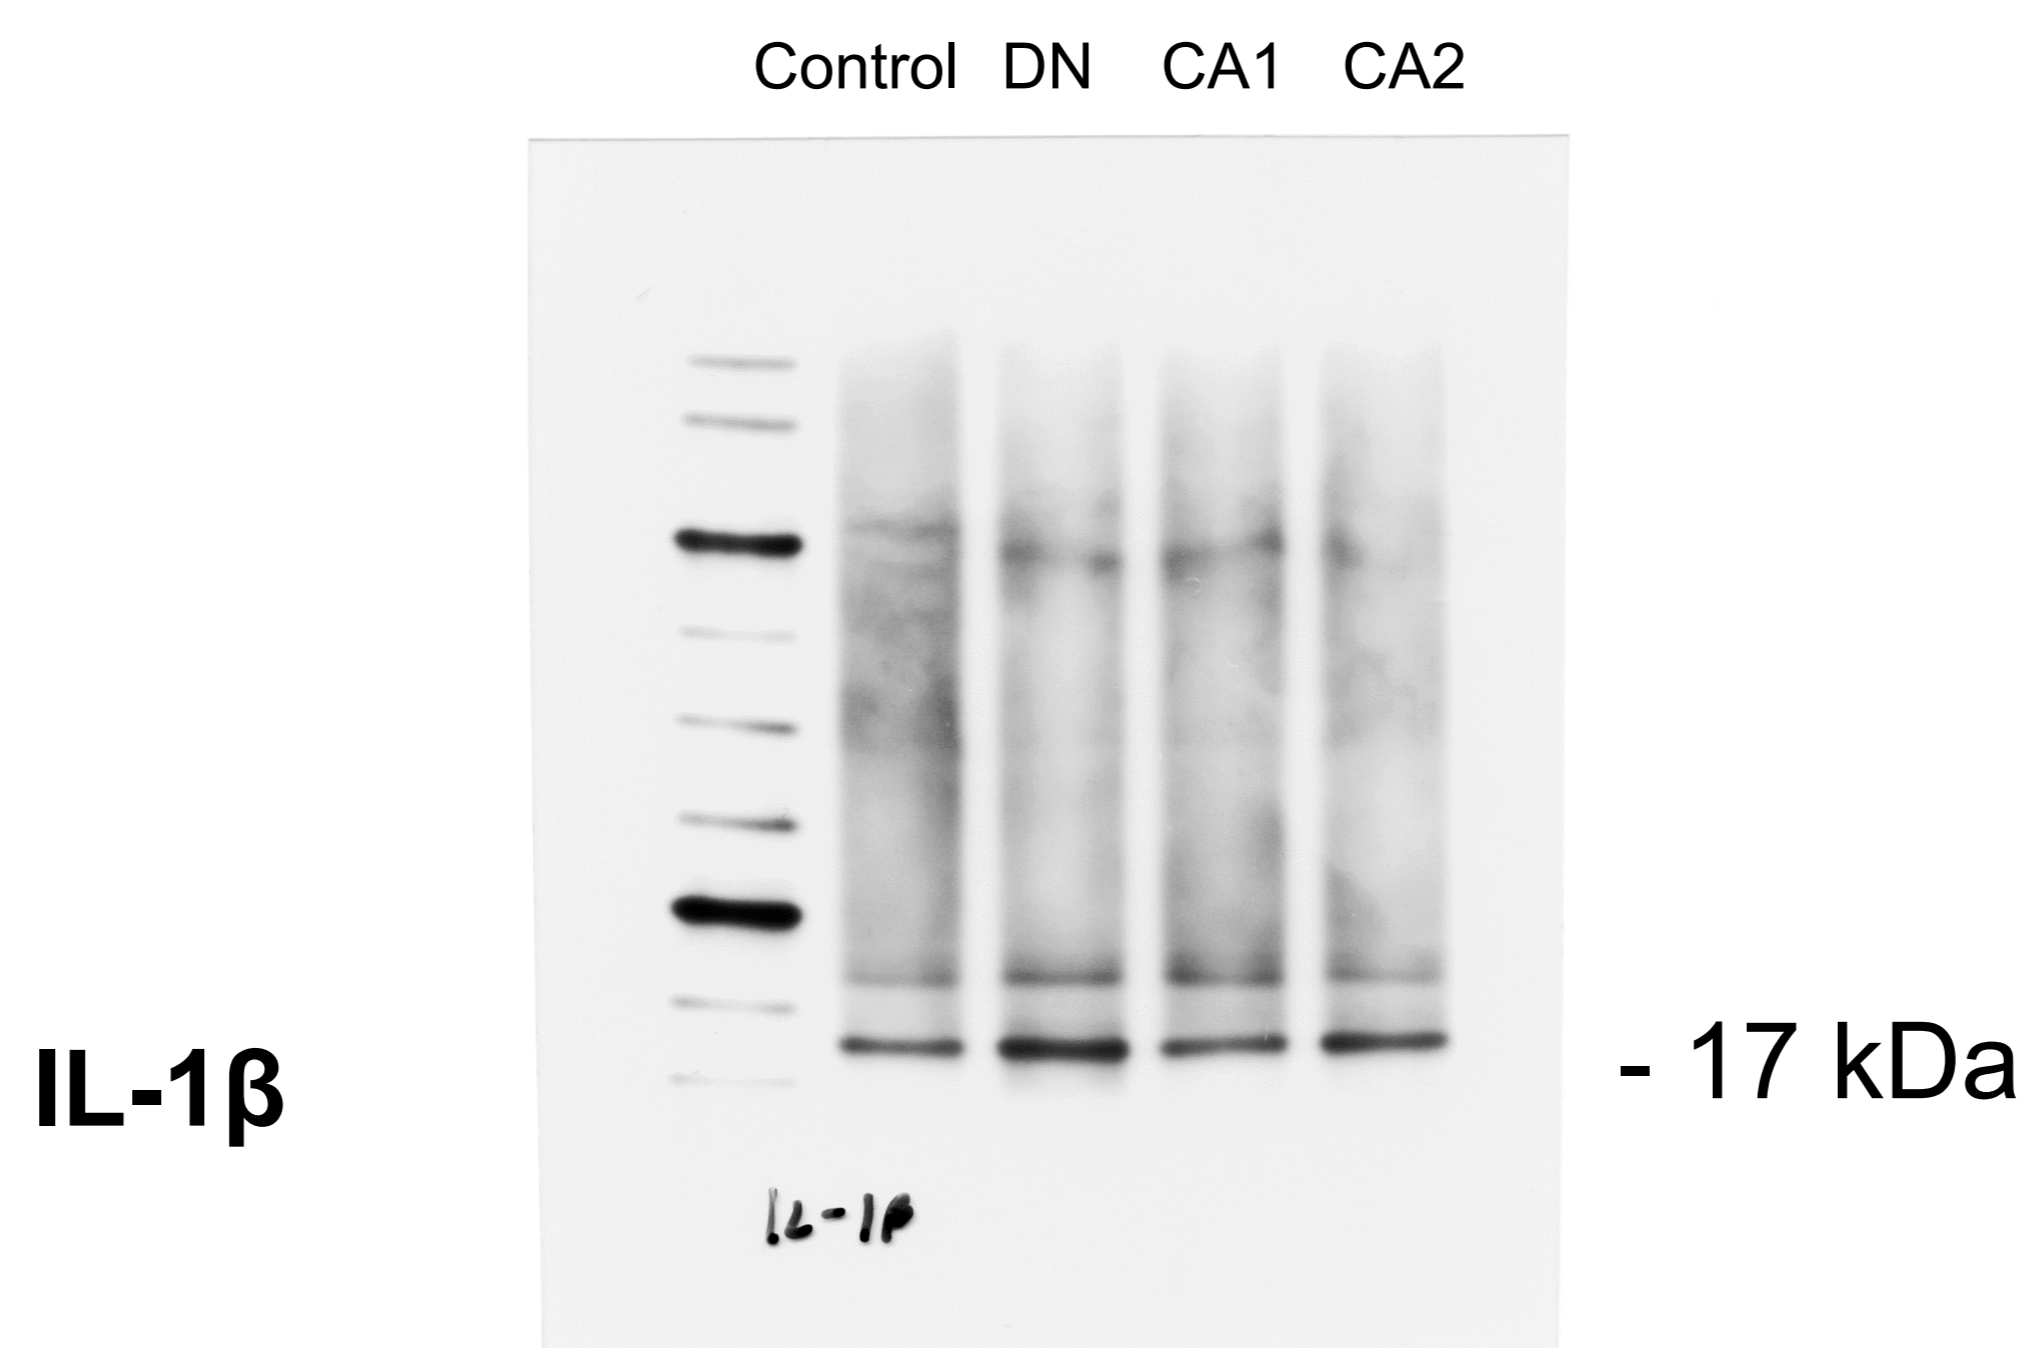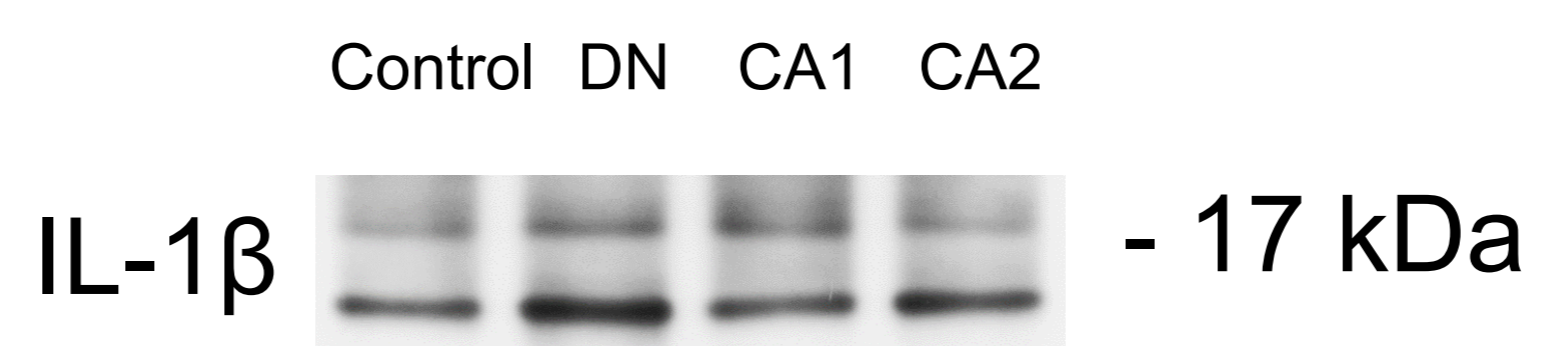

**Figure 4E**

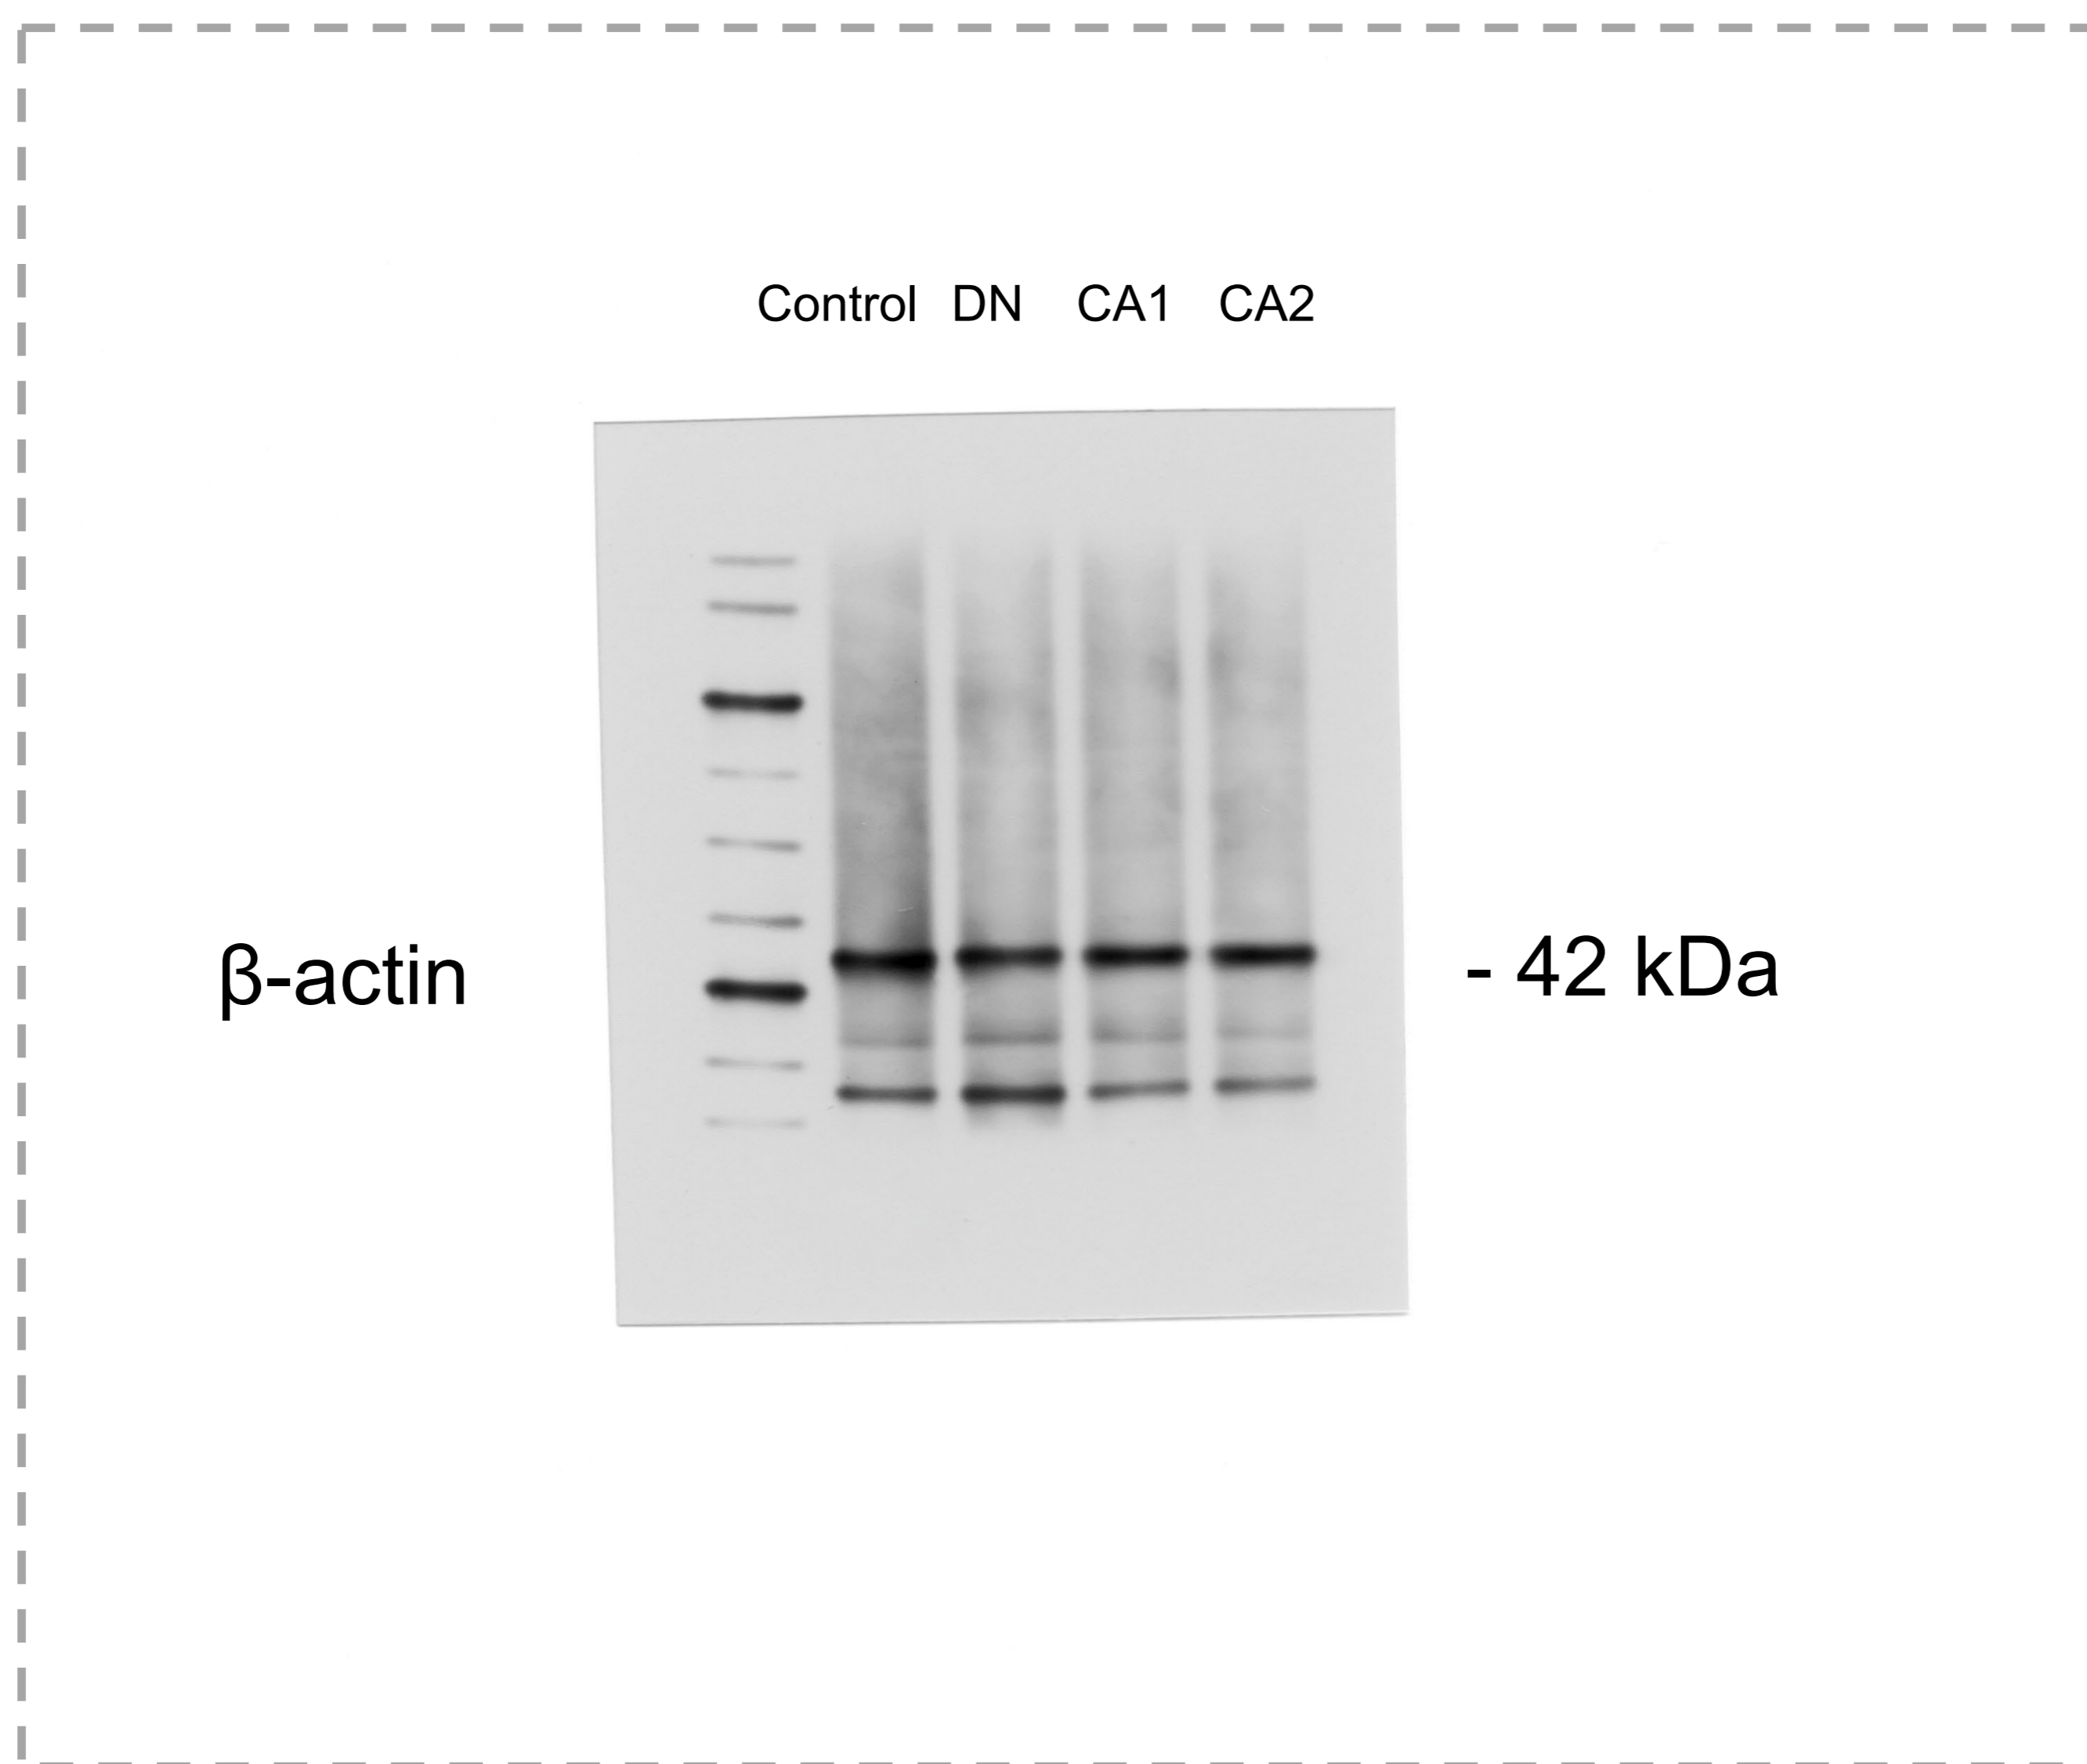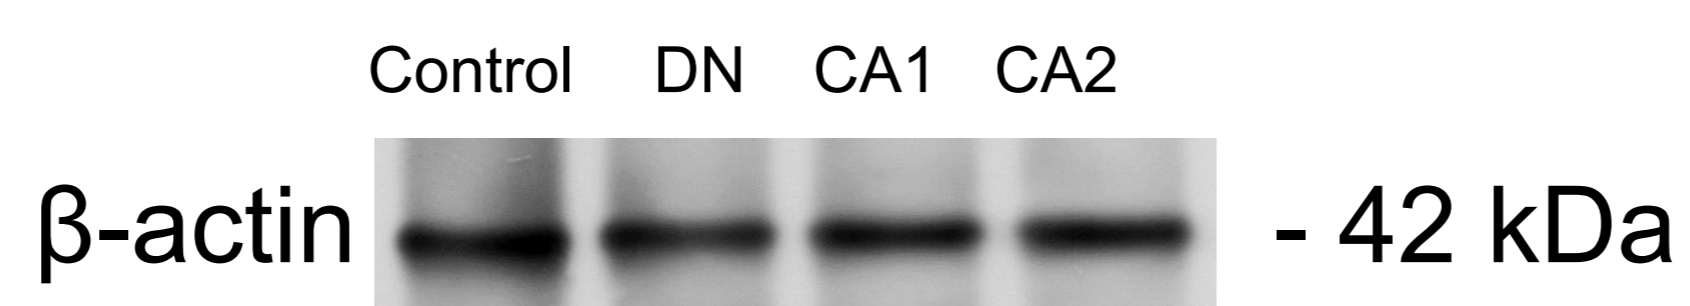

**Figure 5D**

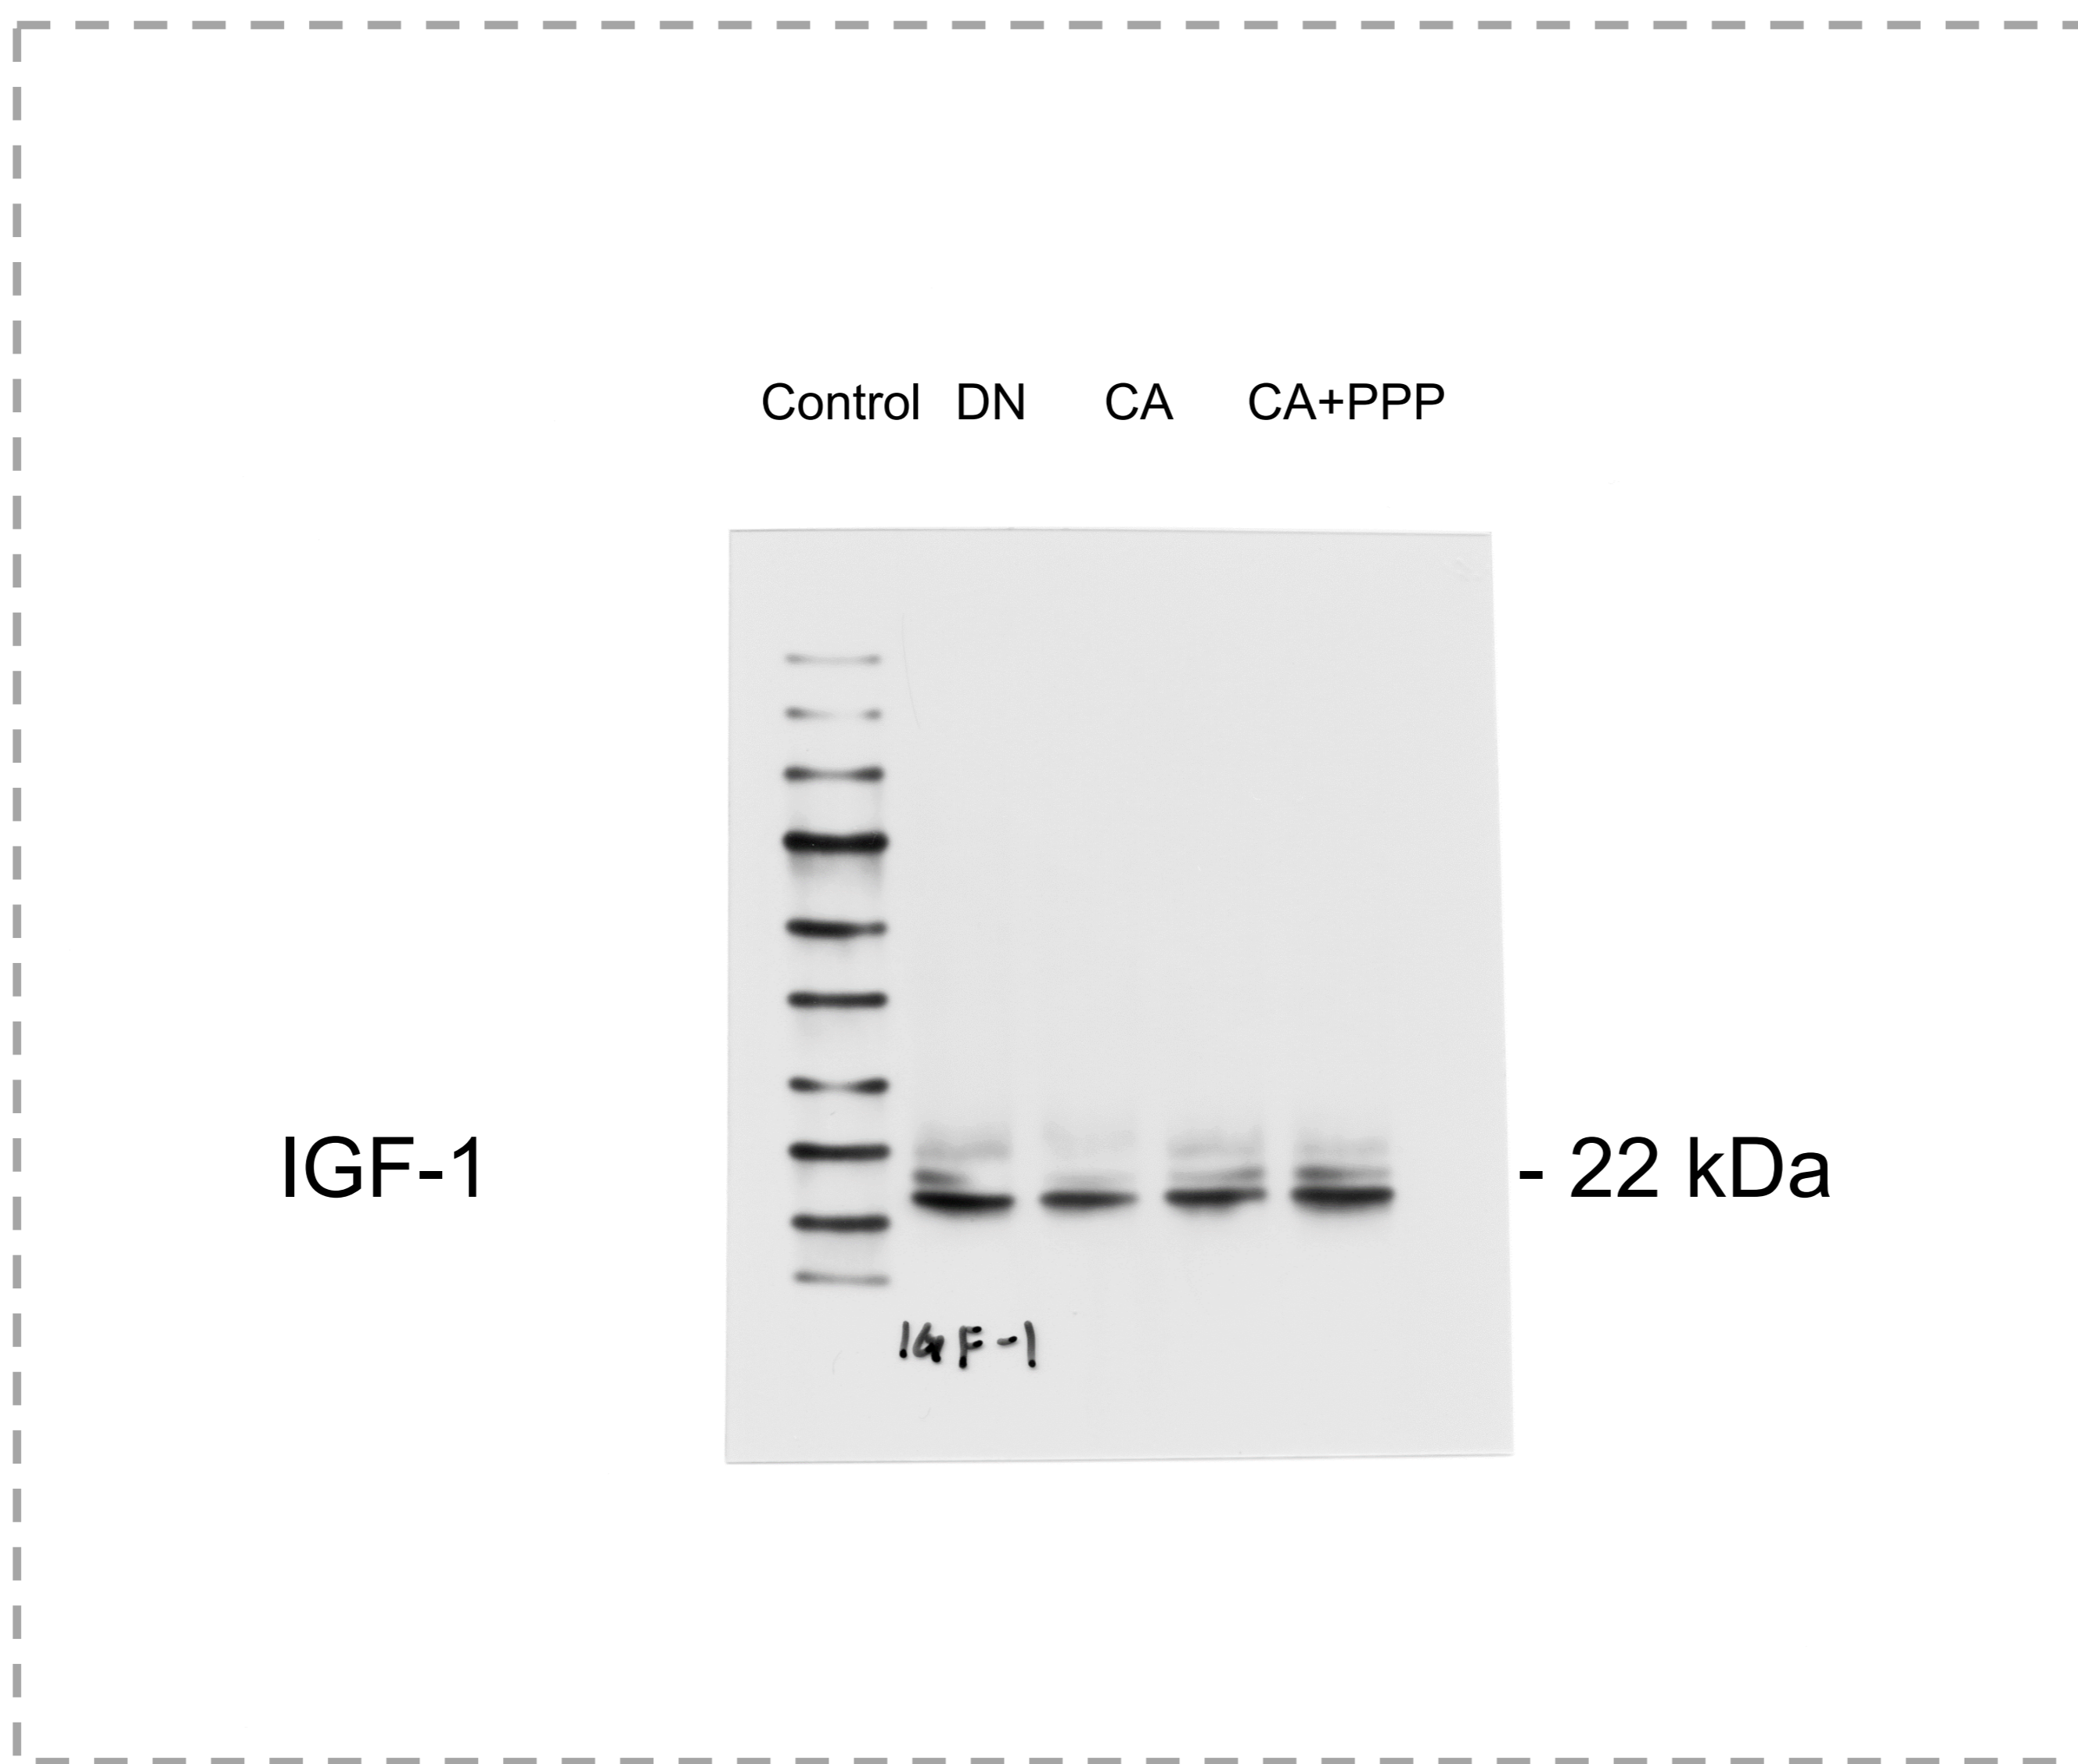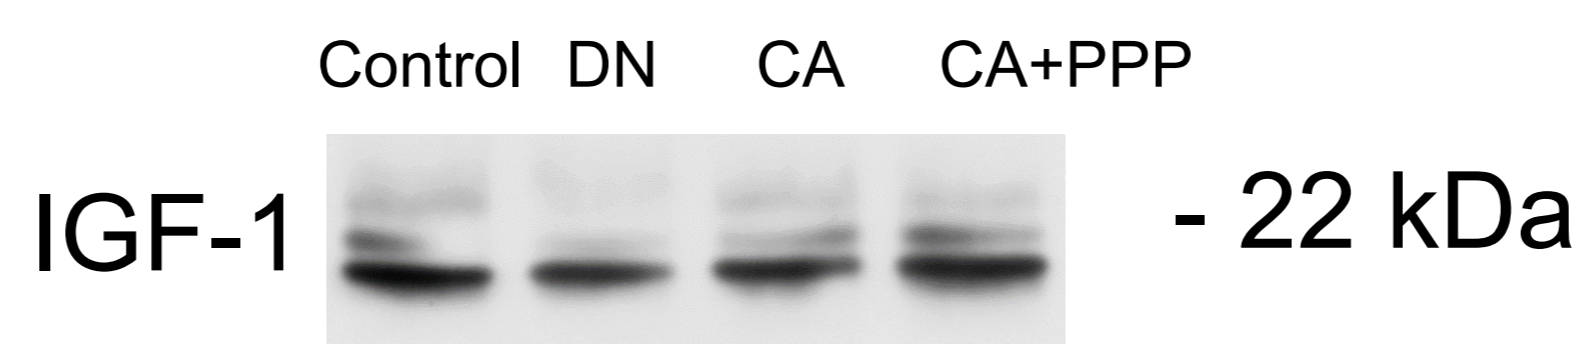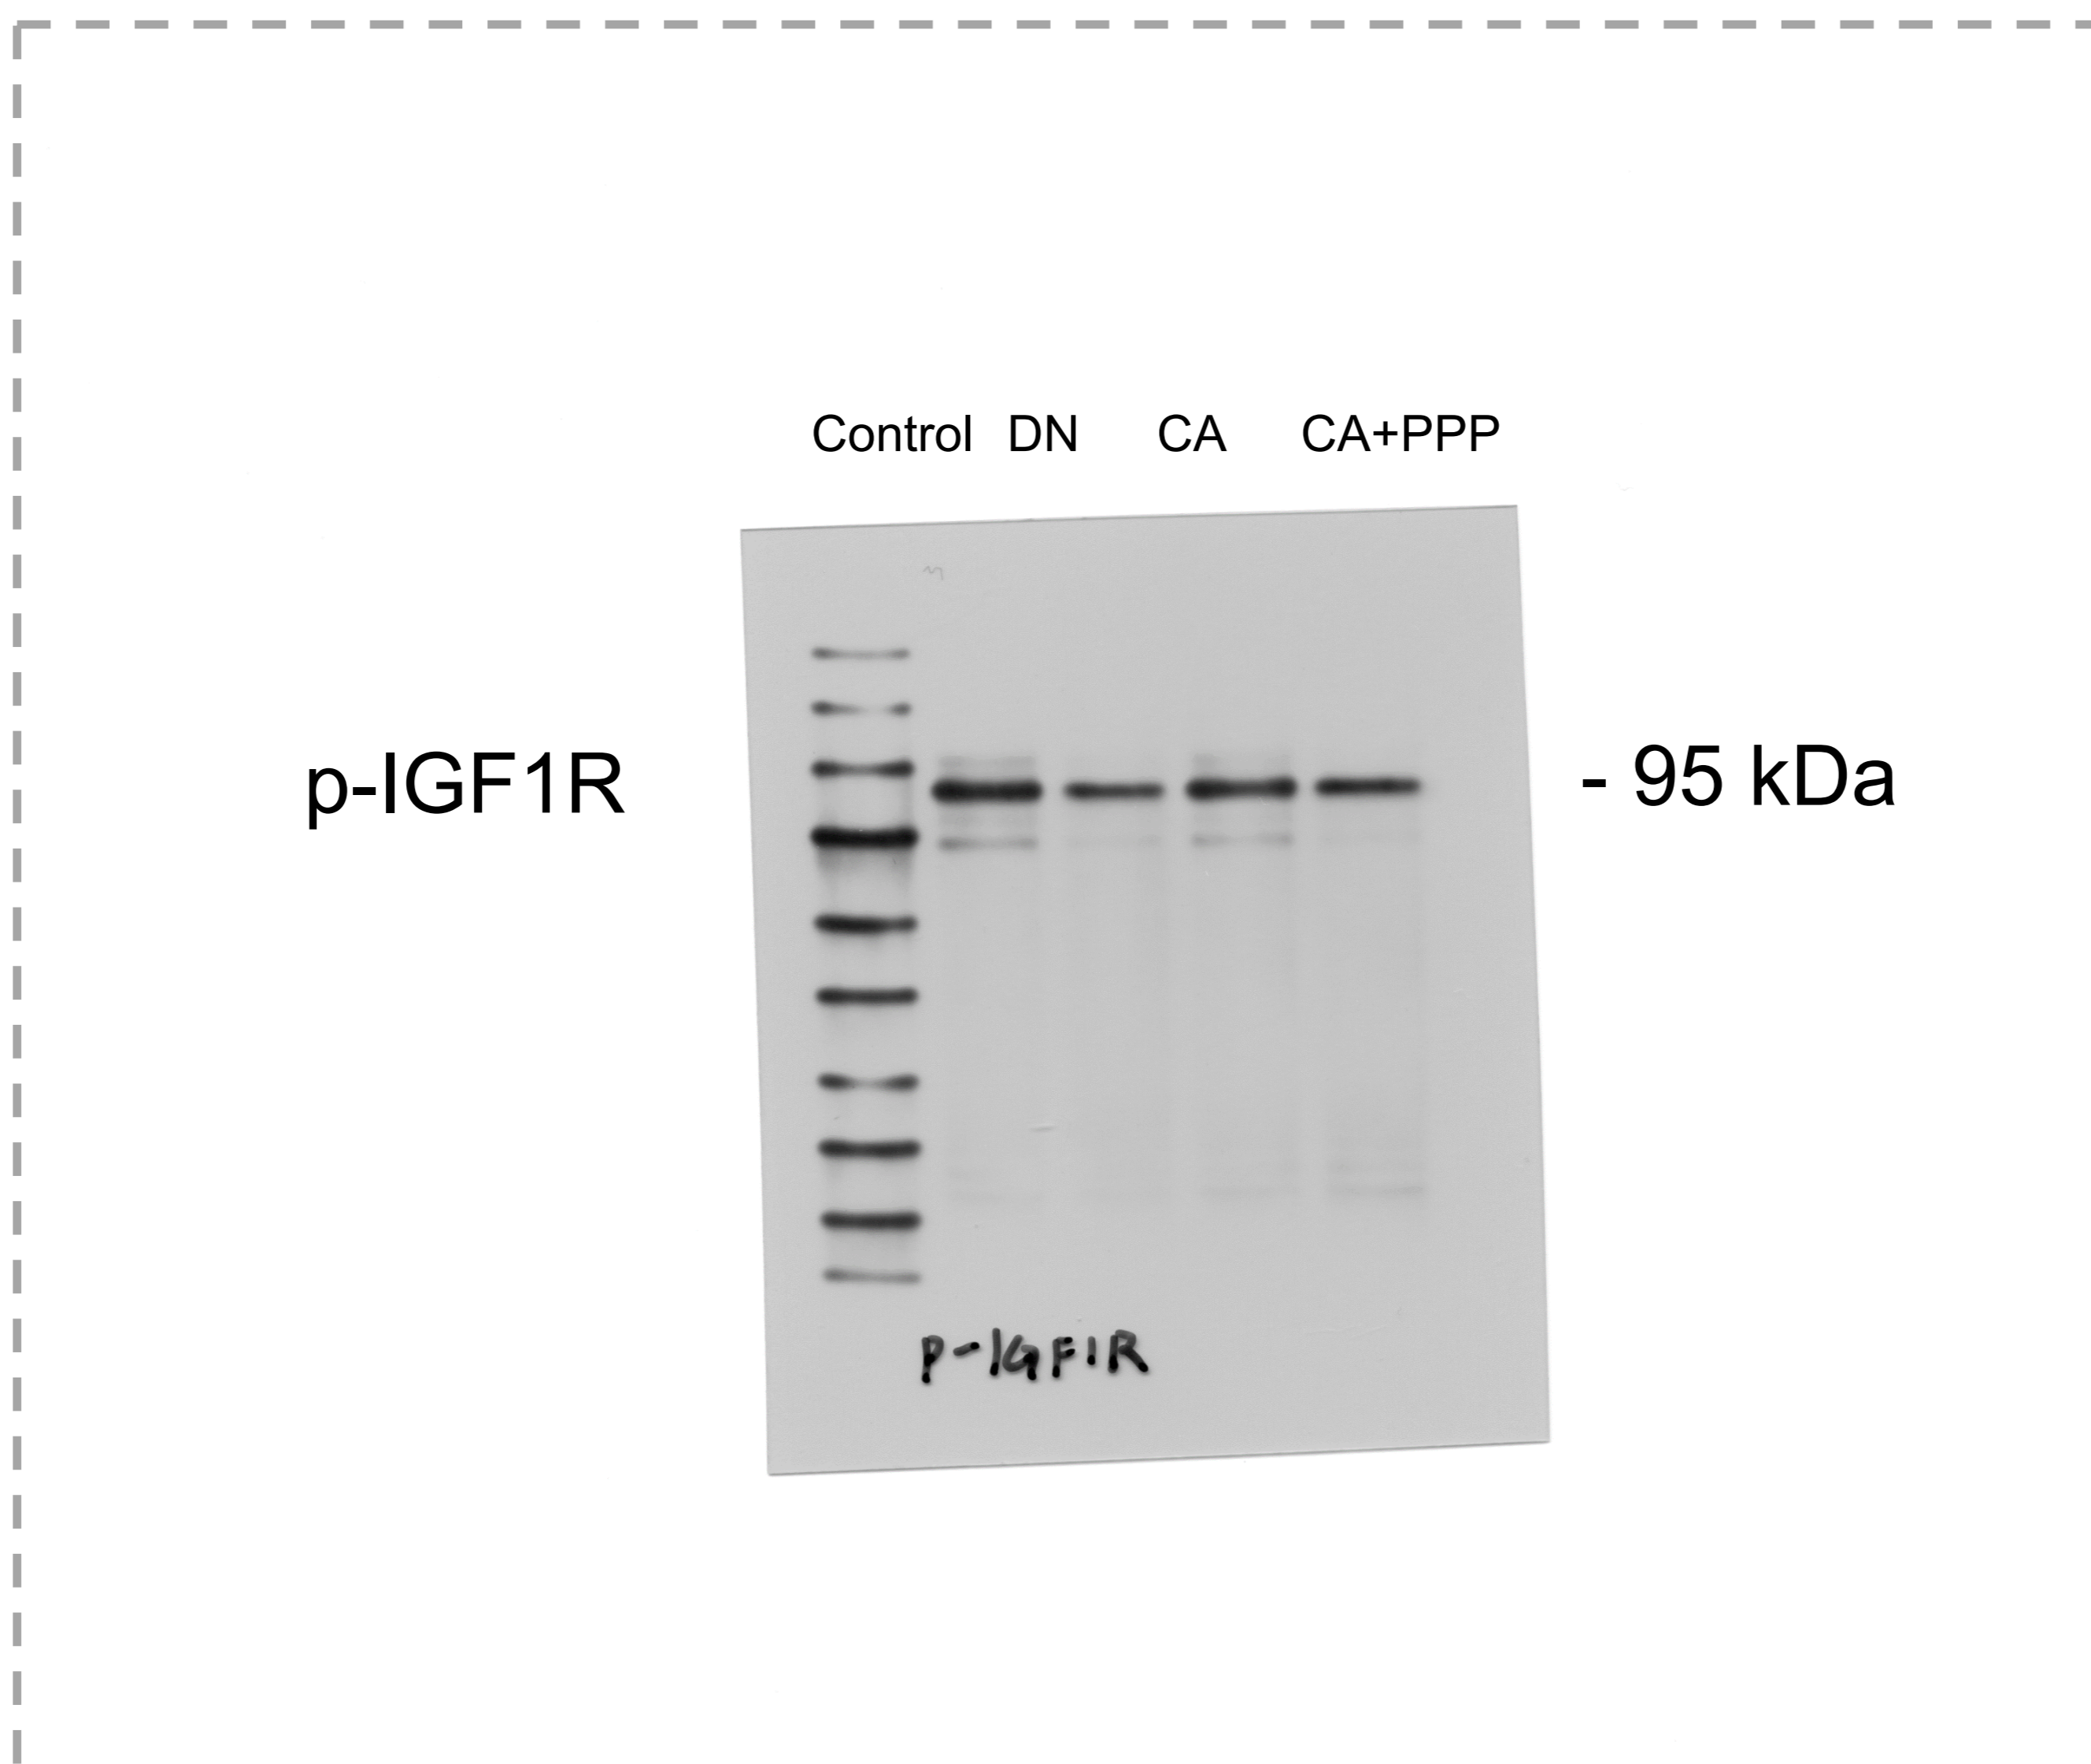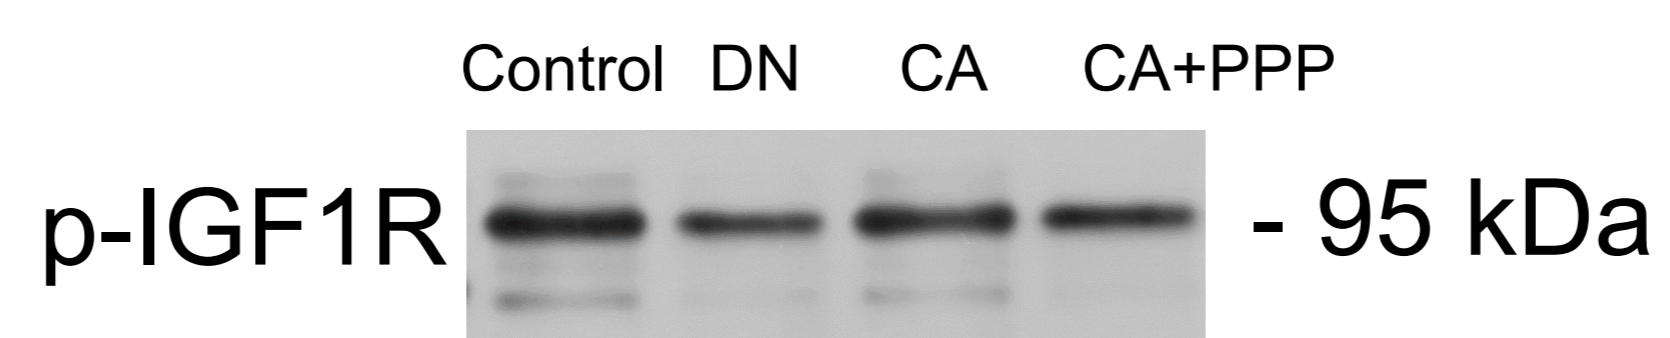

**Figure 5D**

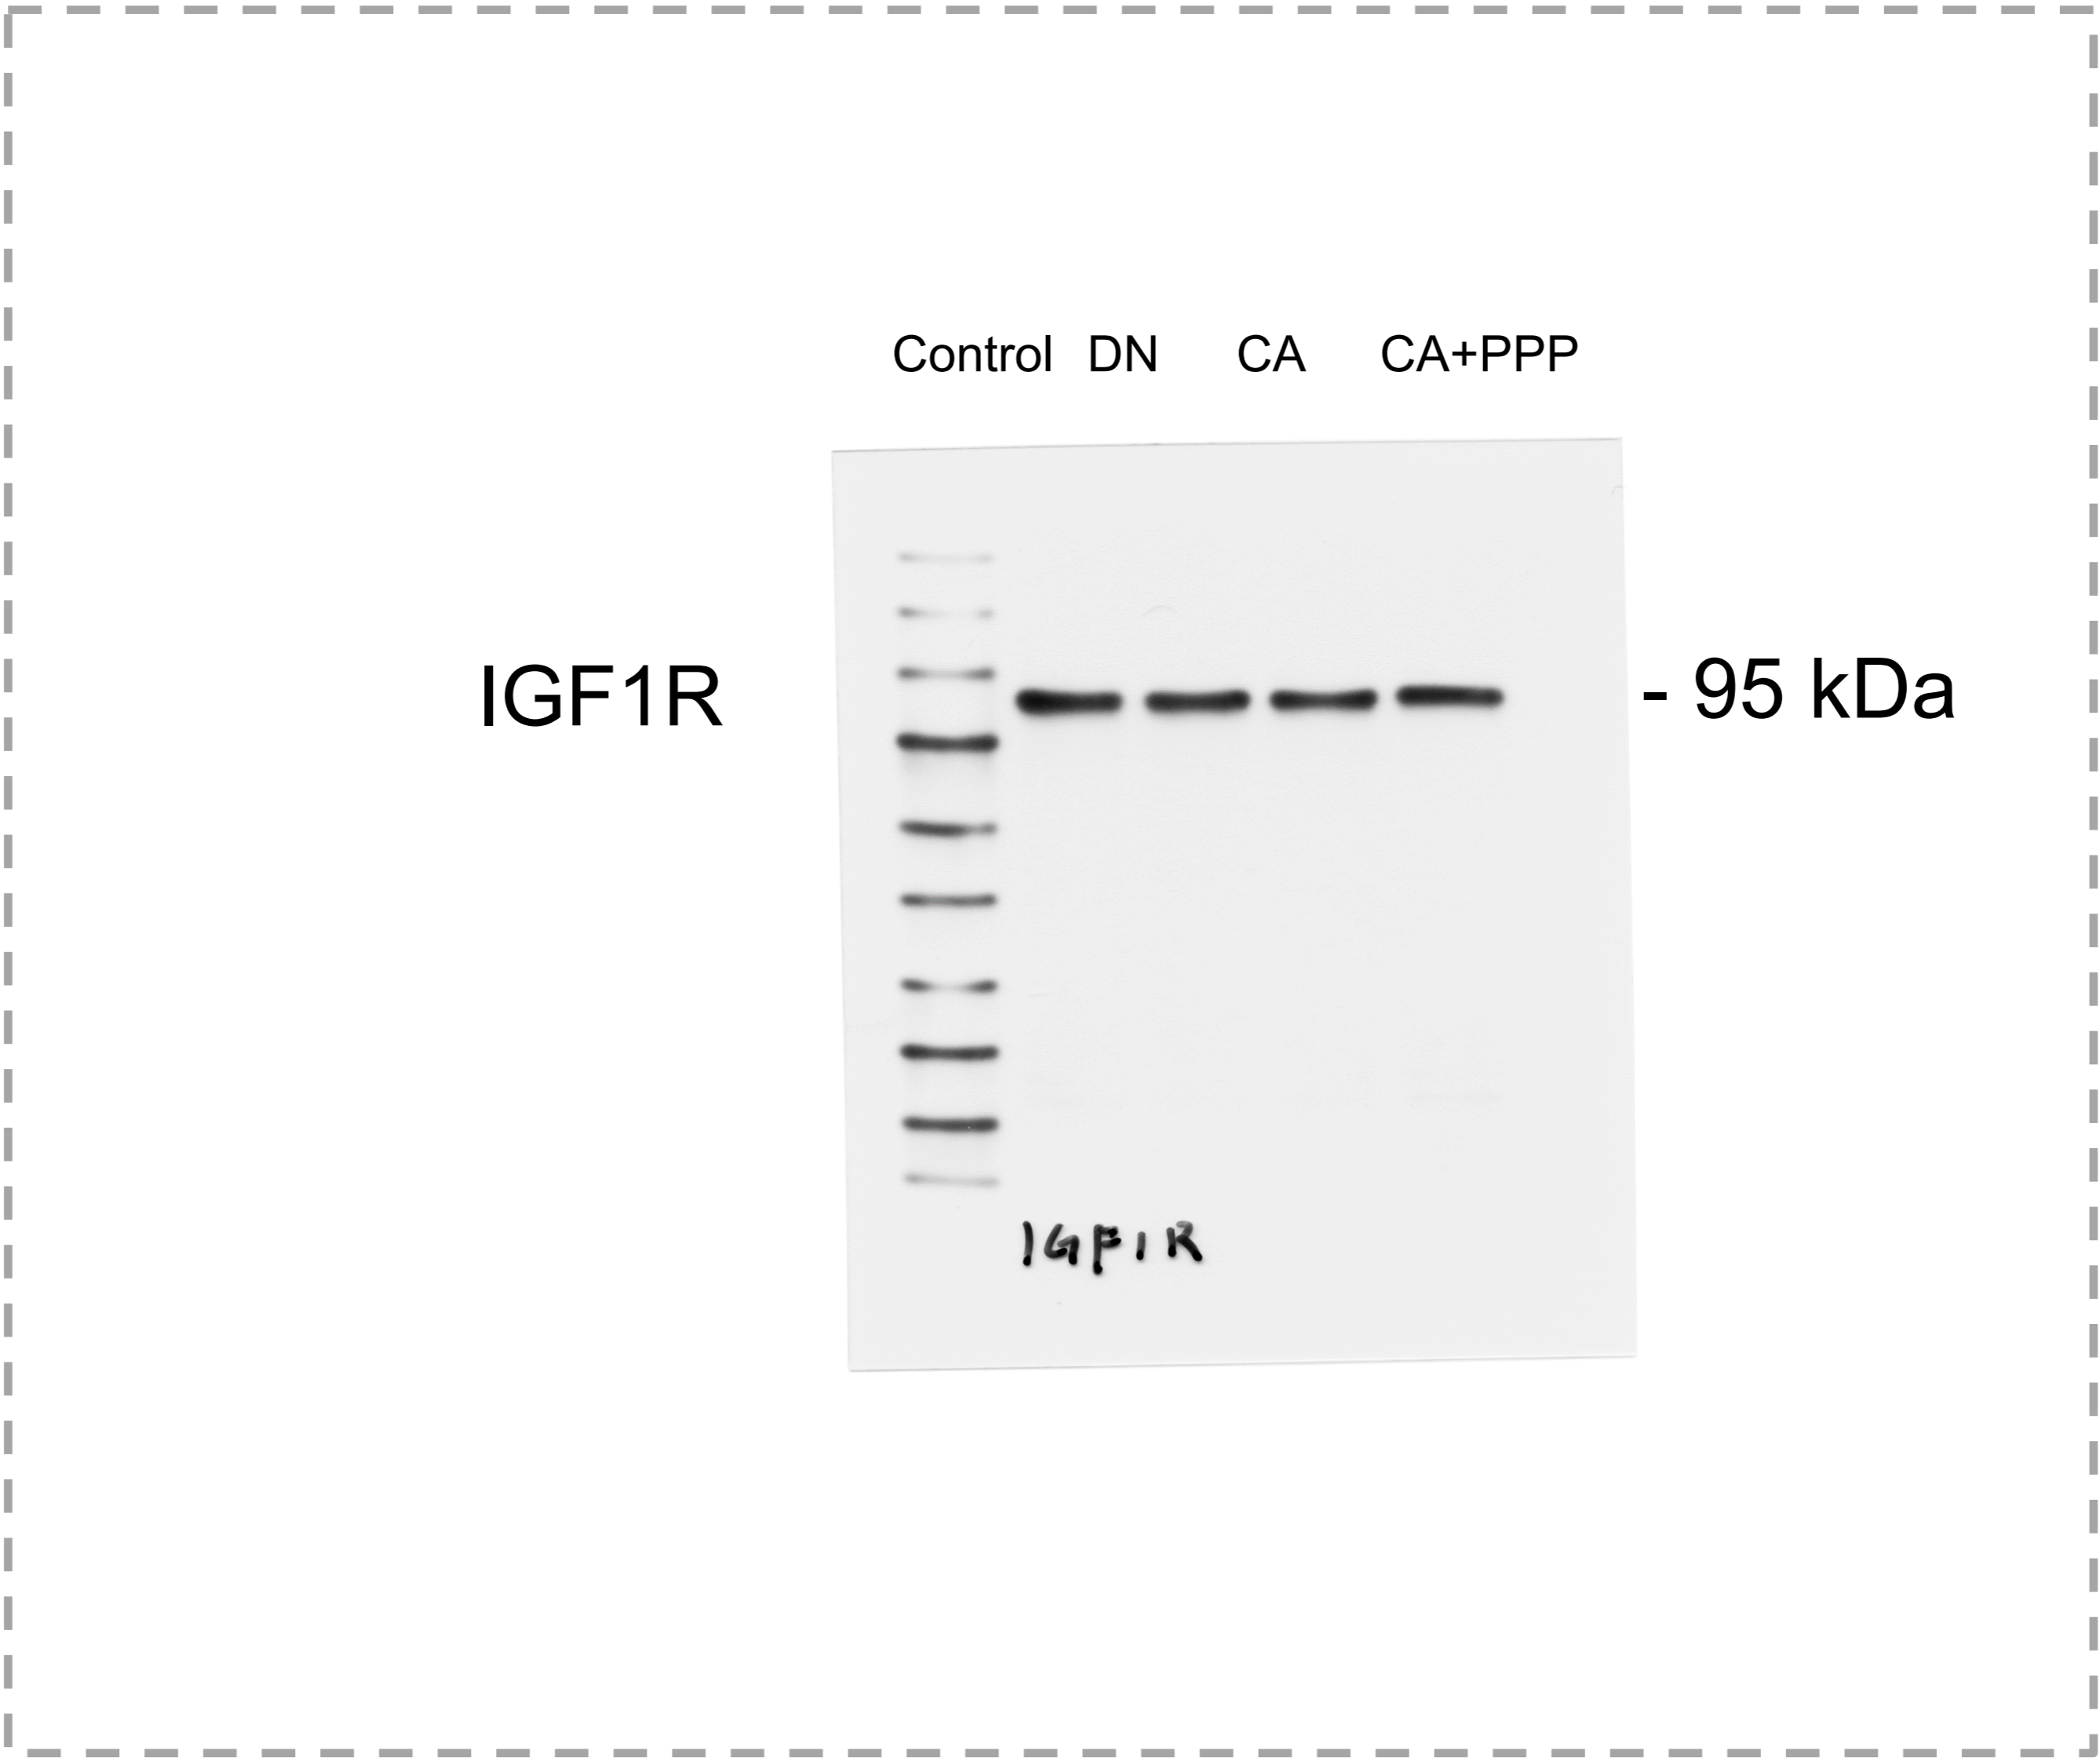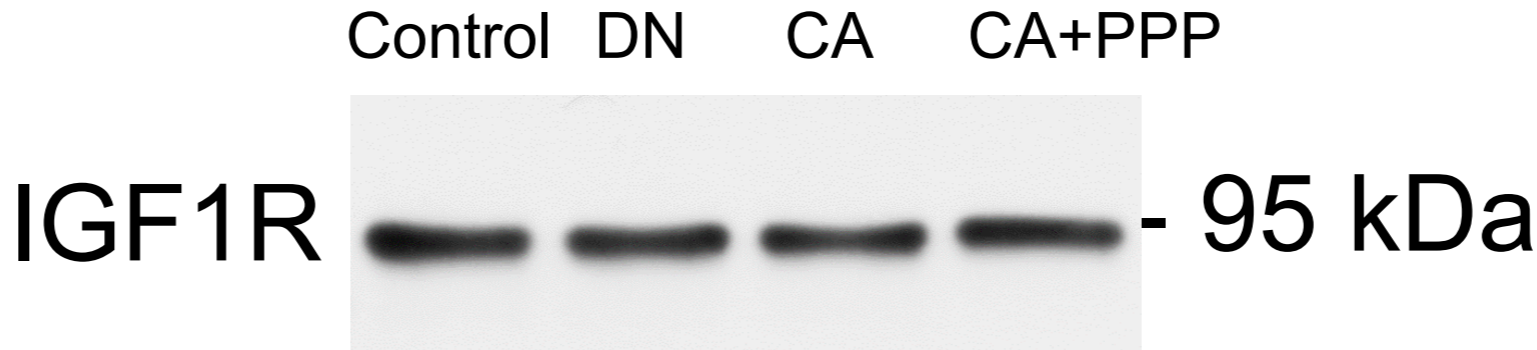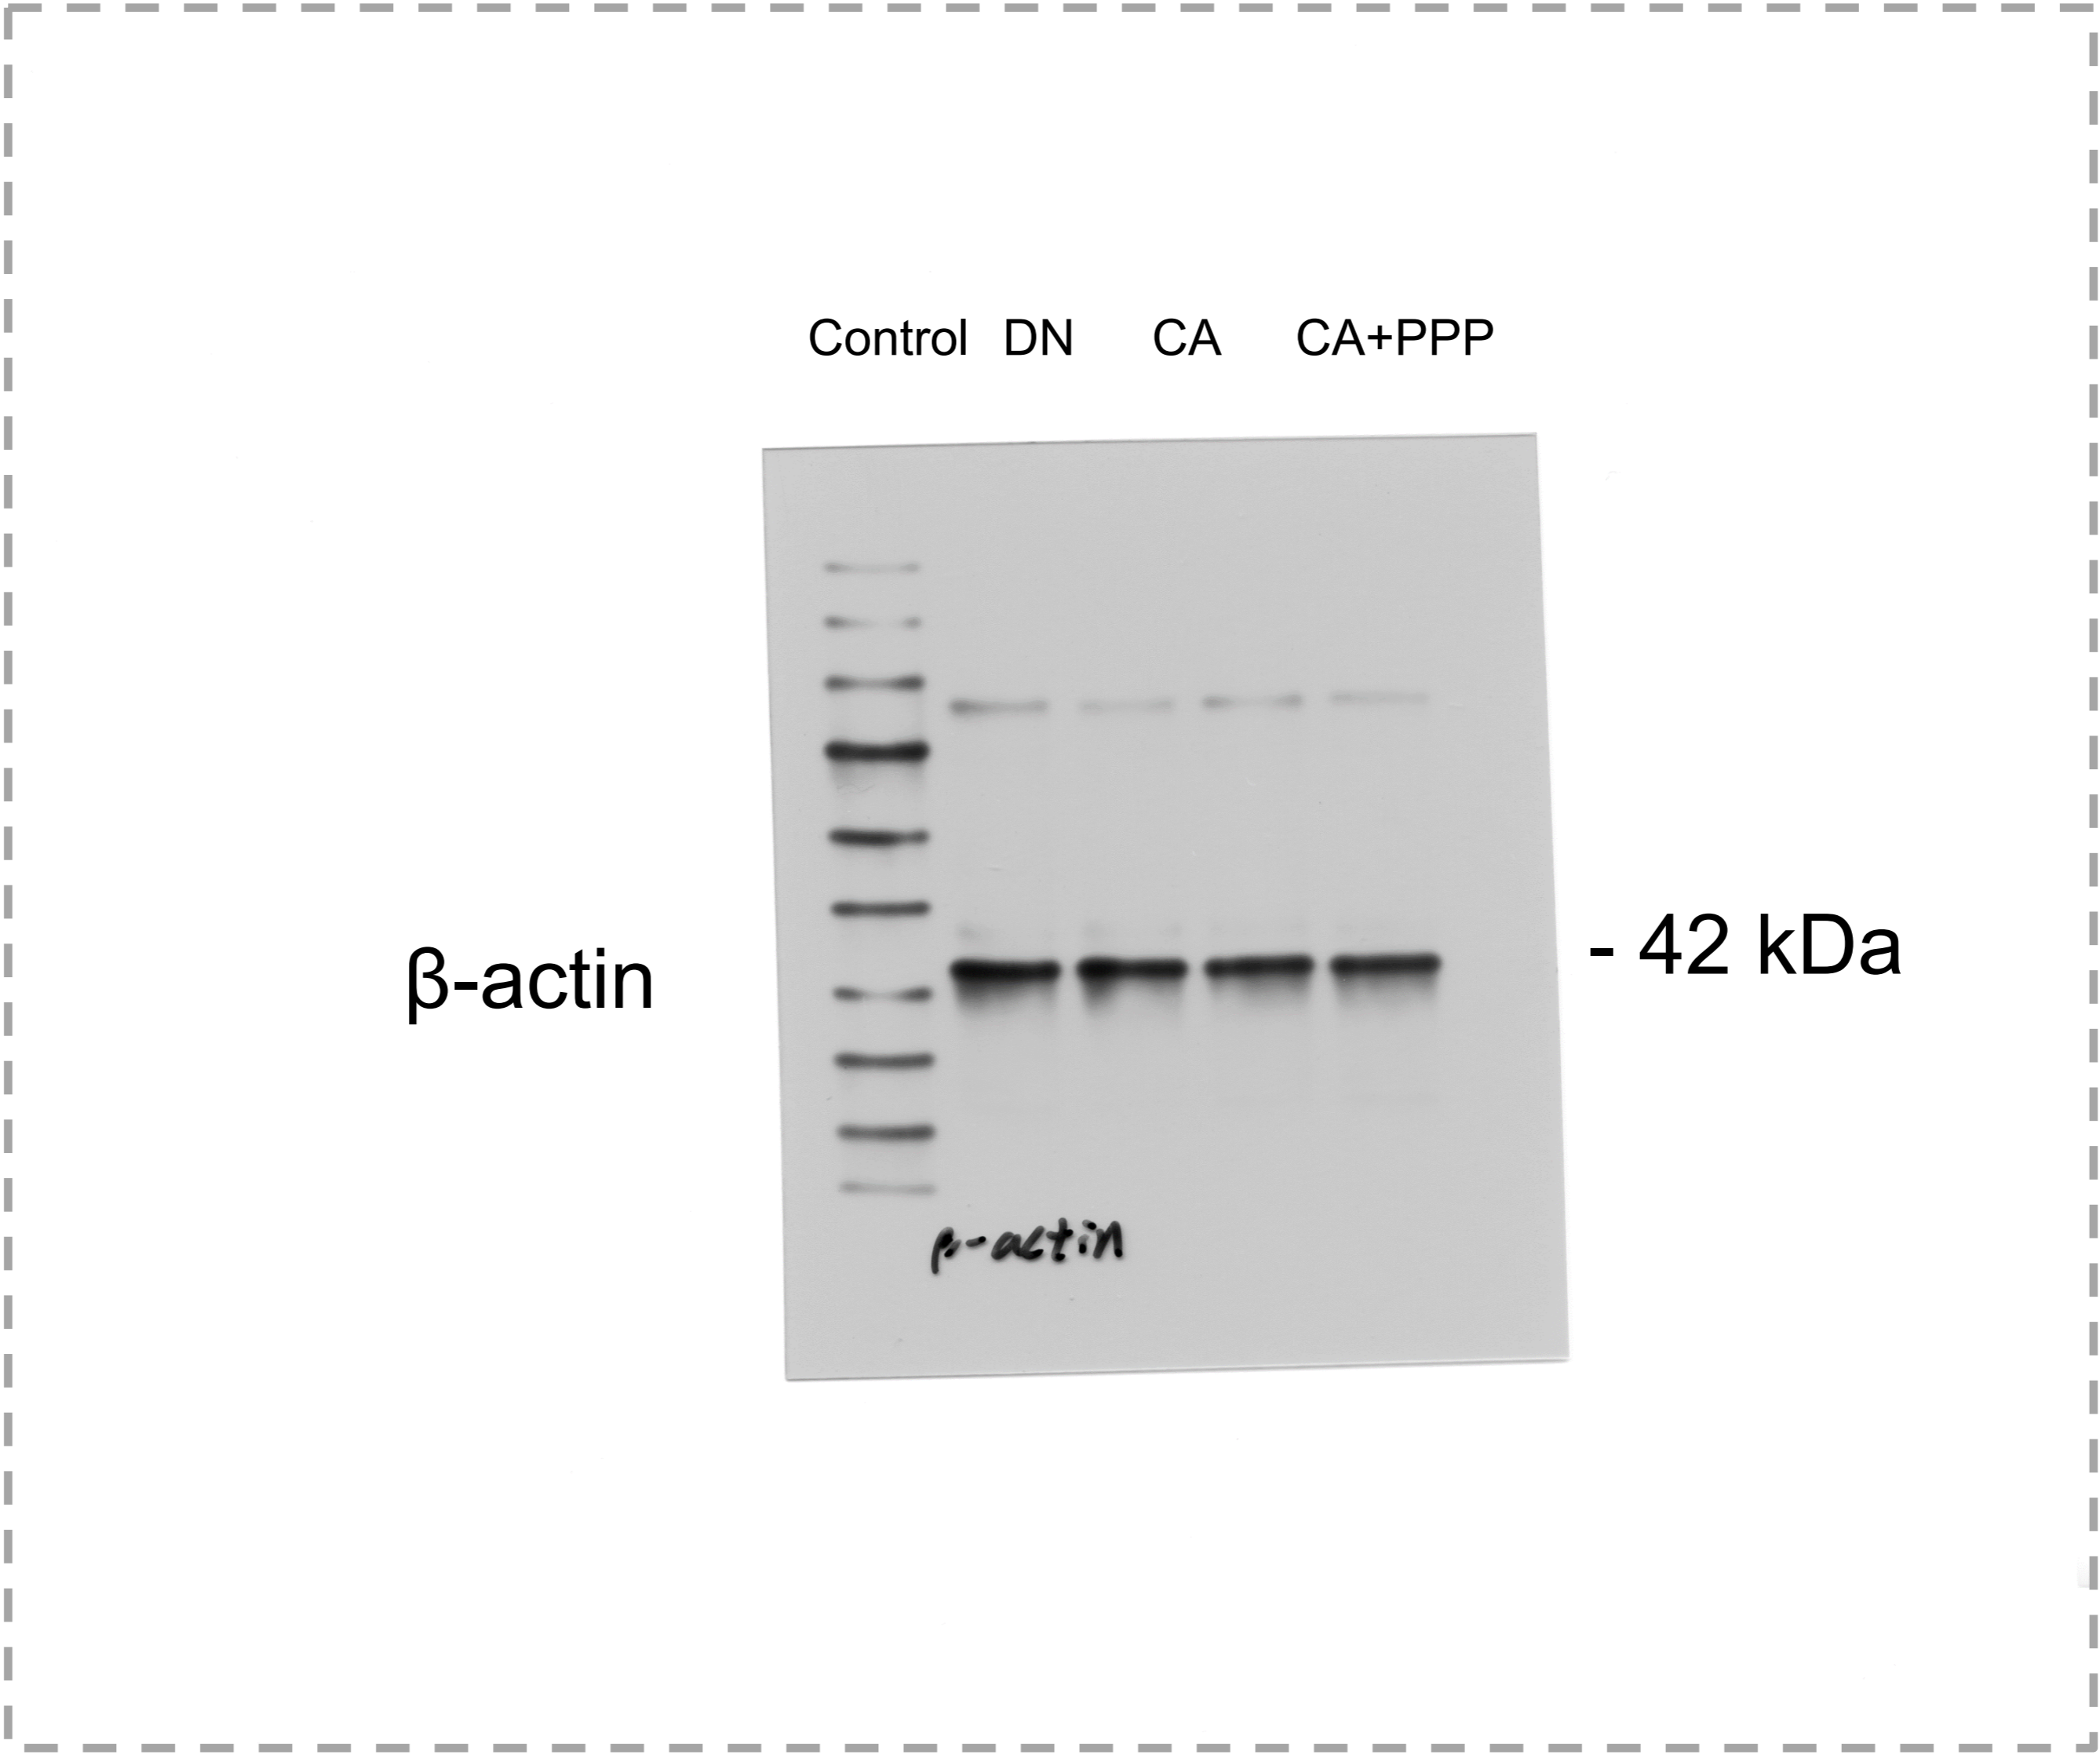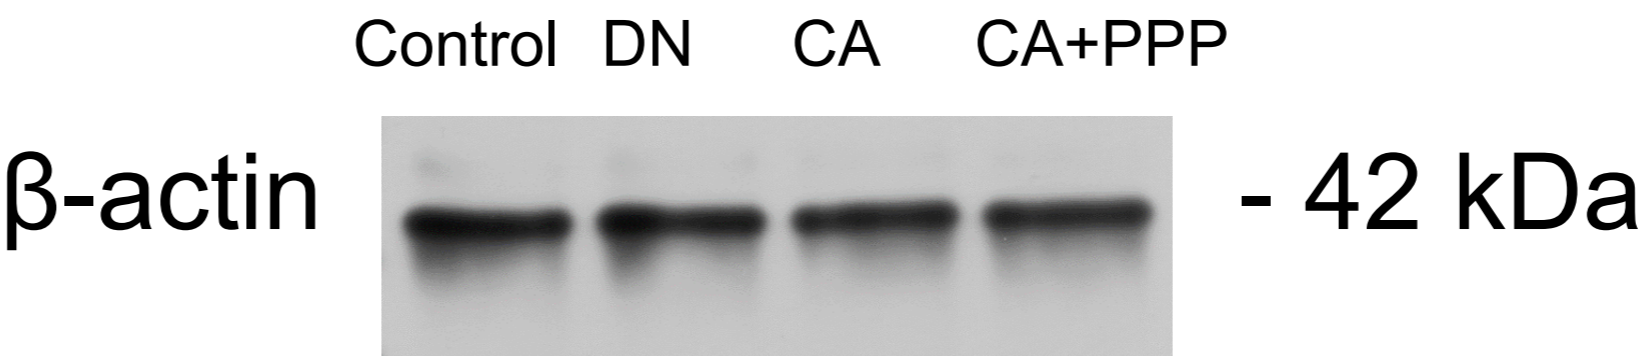

**Figure 6D**

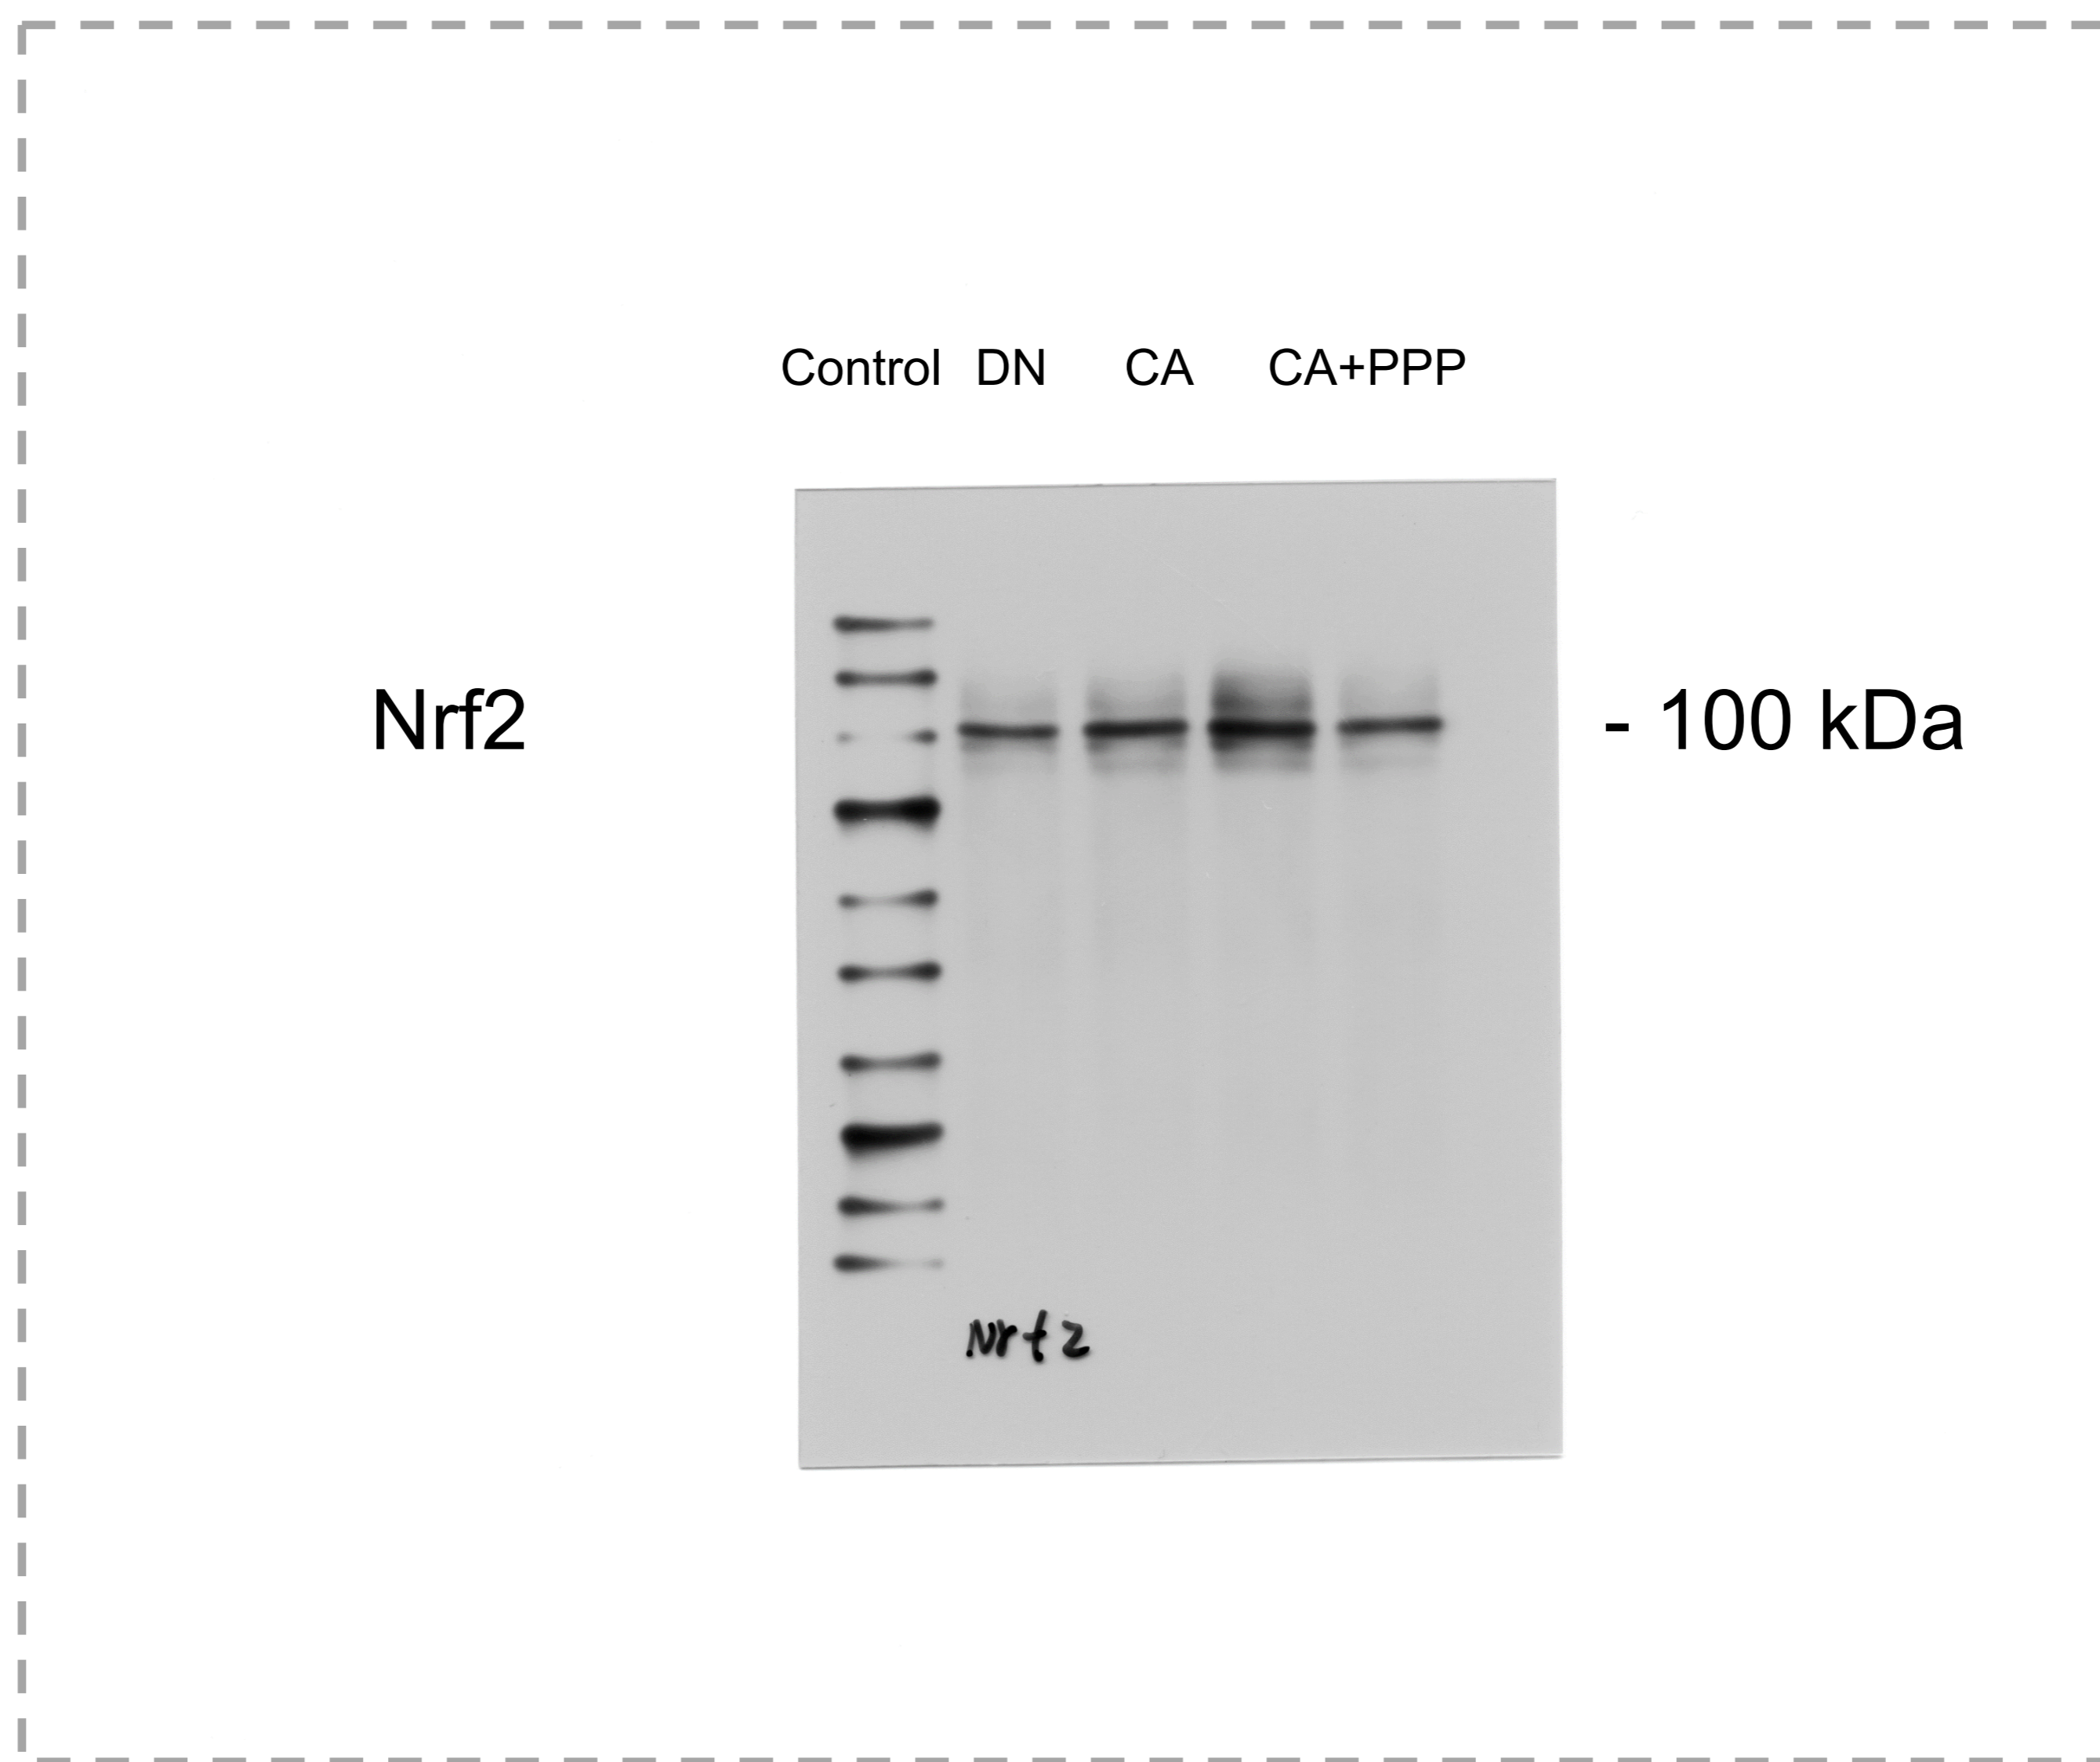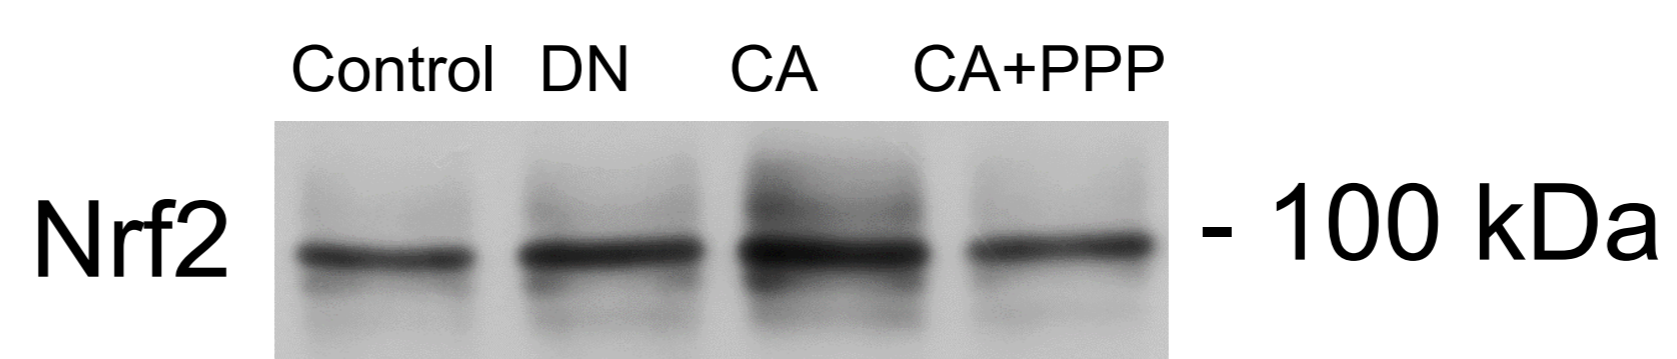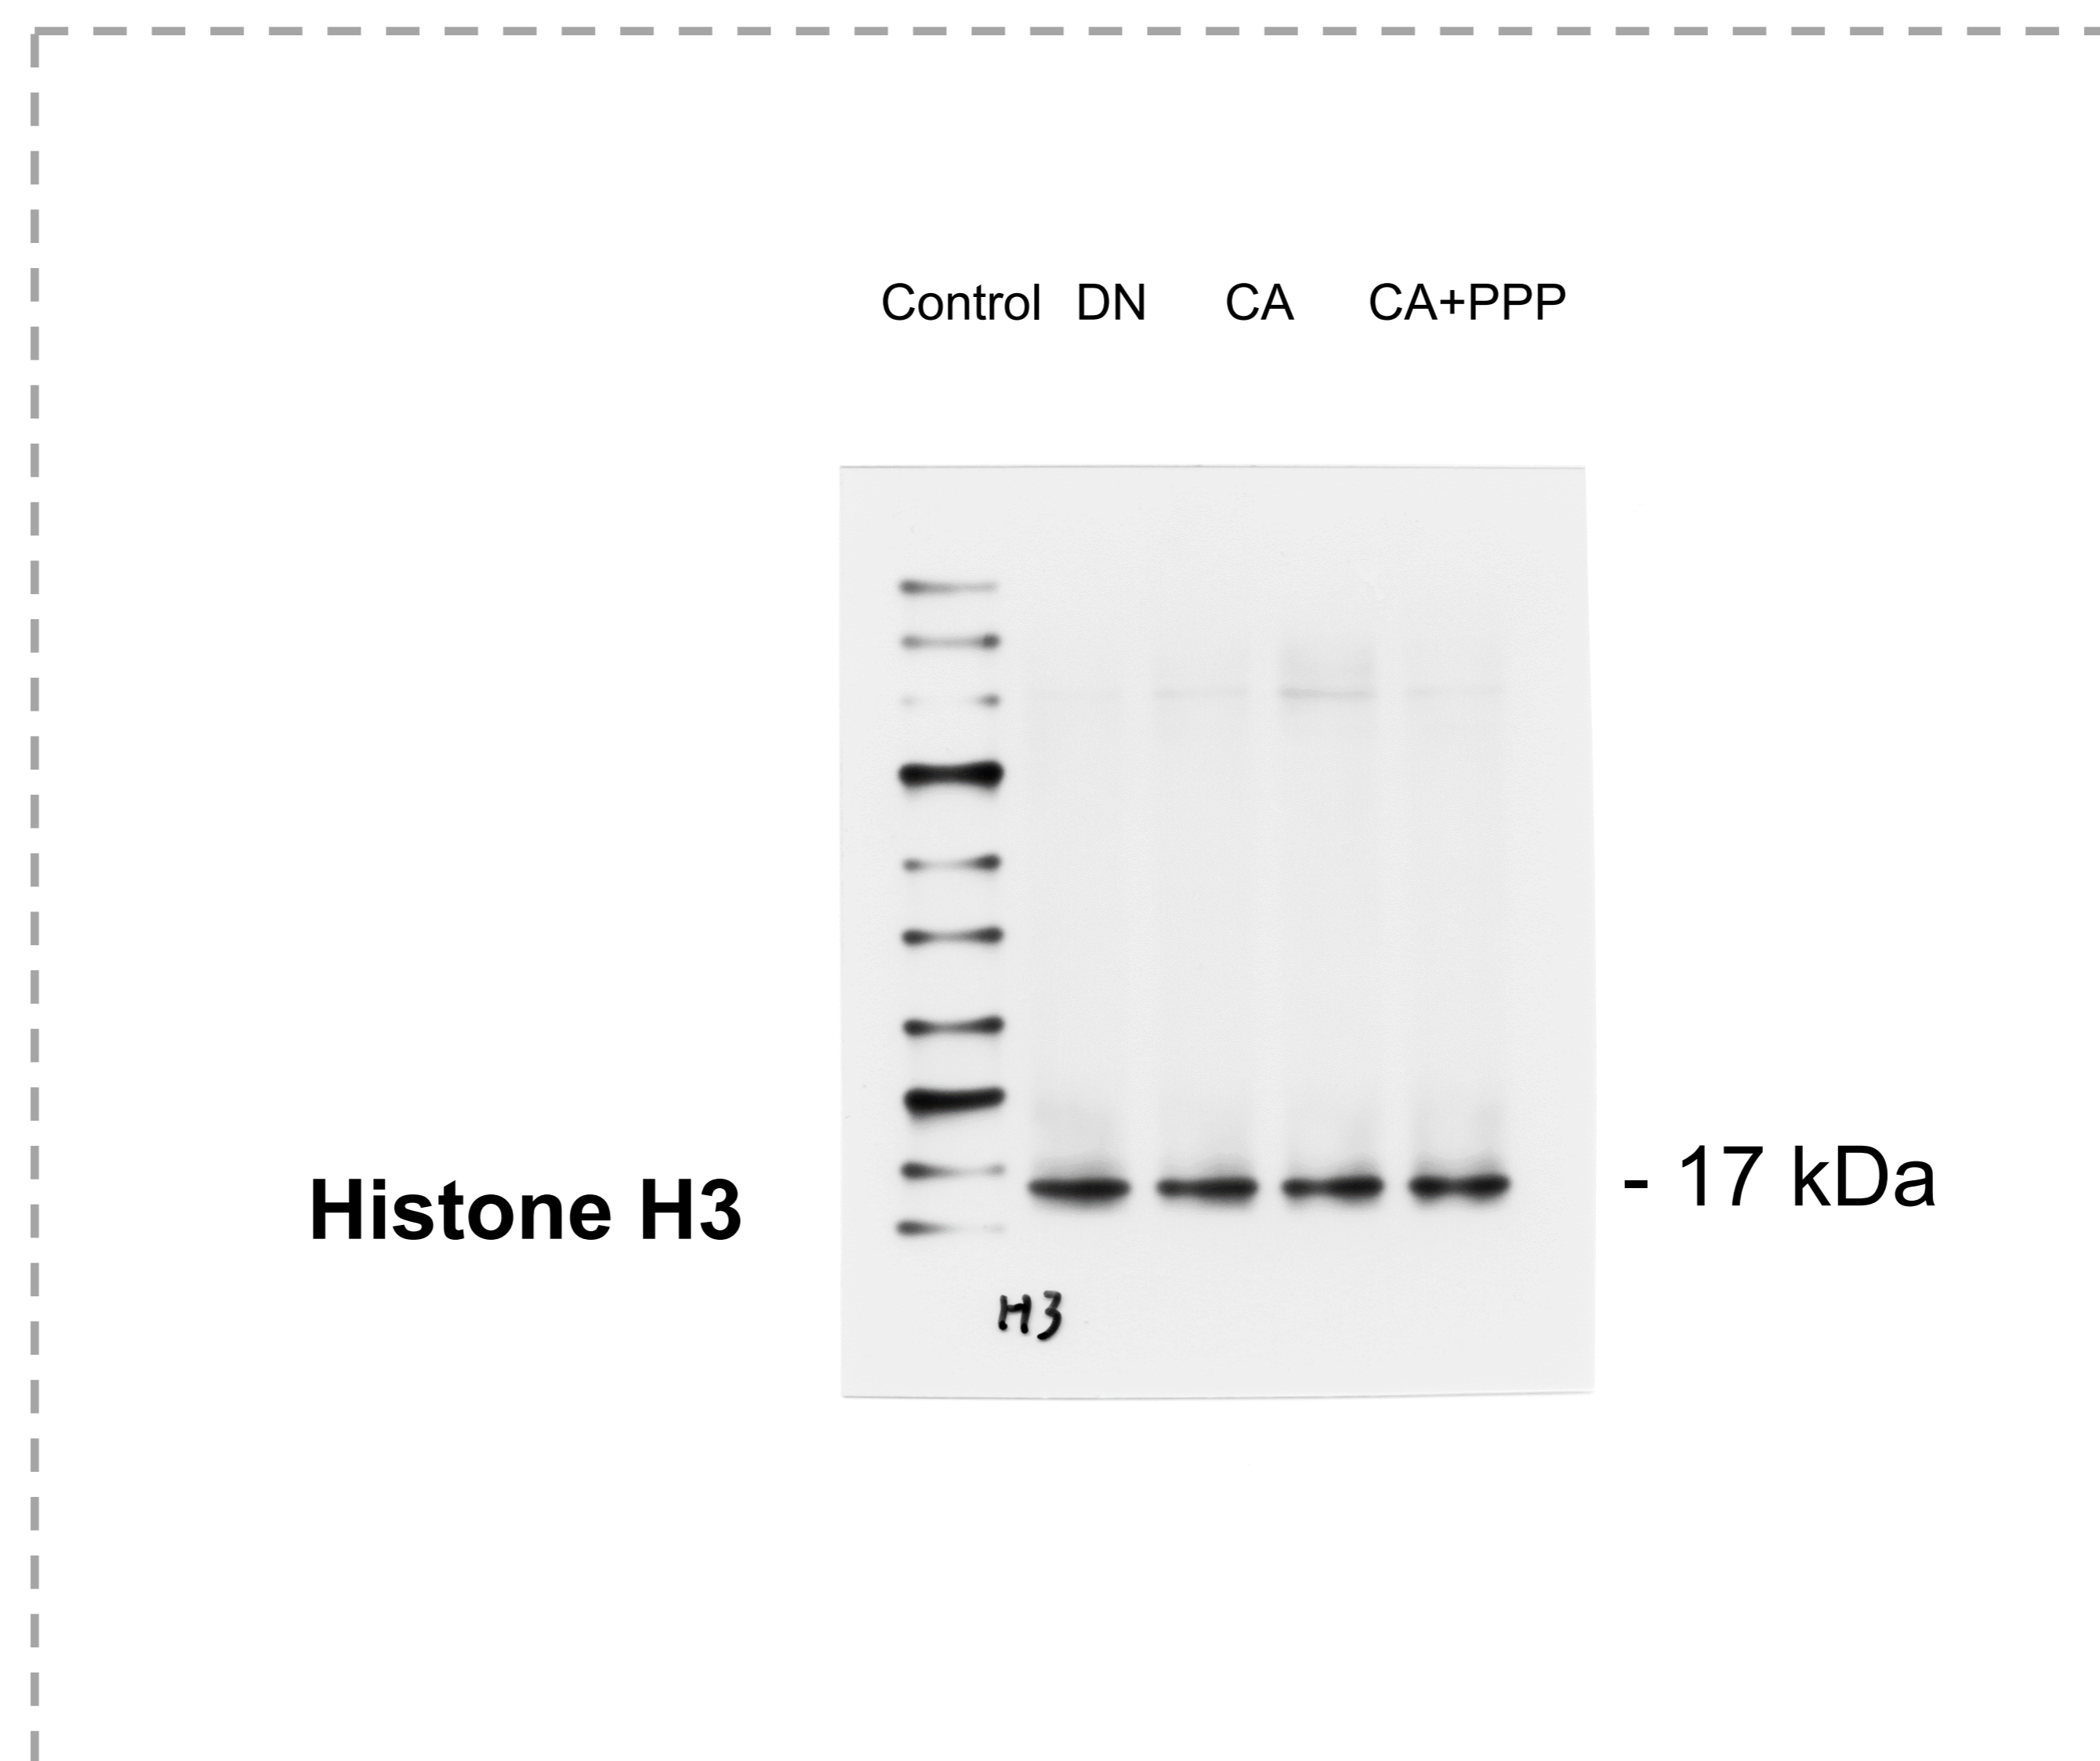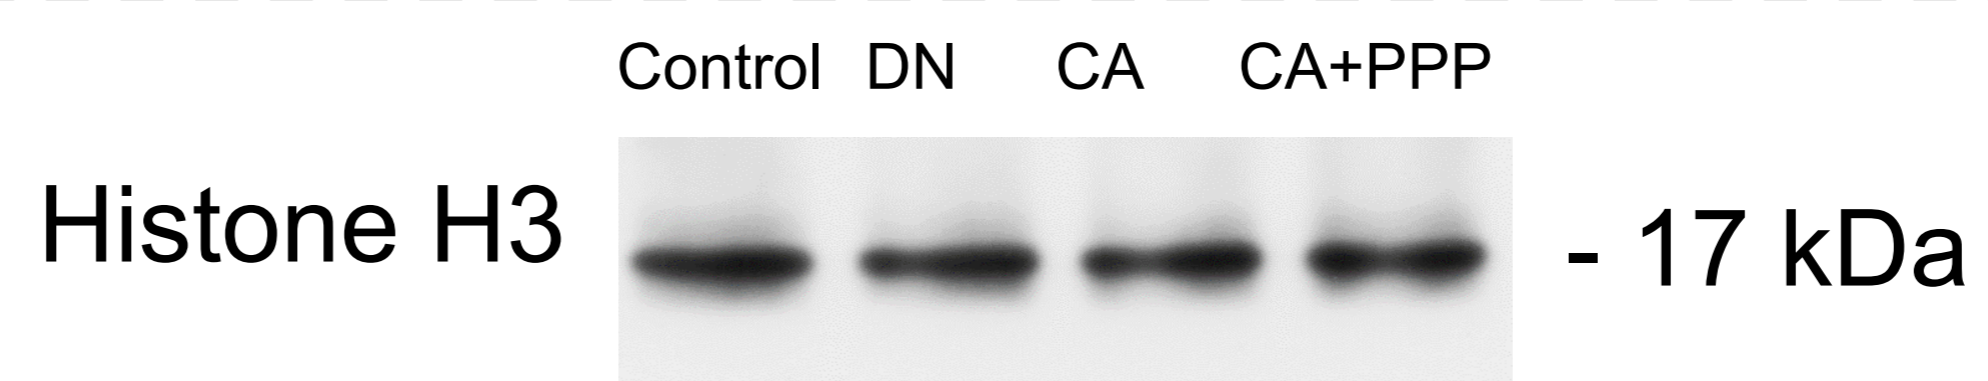



**Figure 7C**

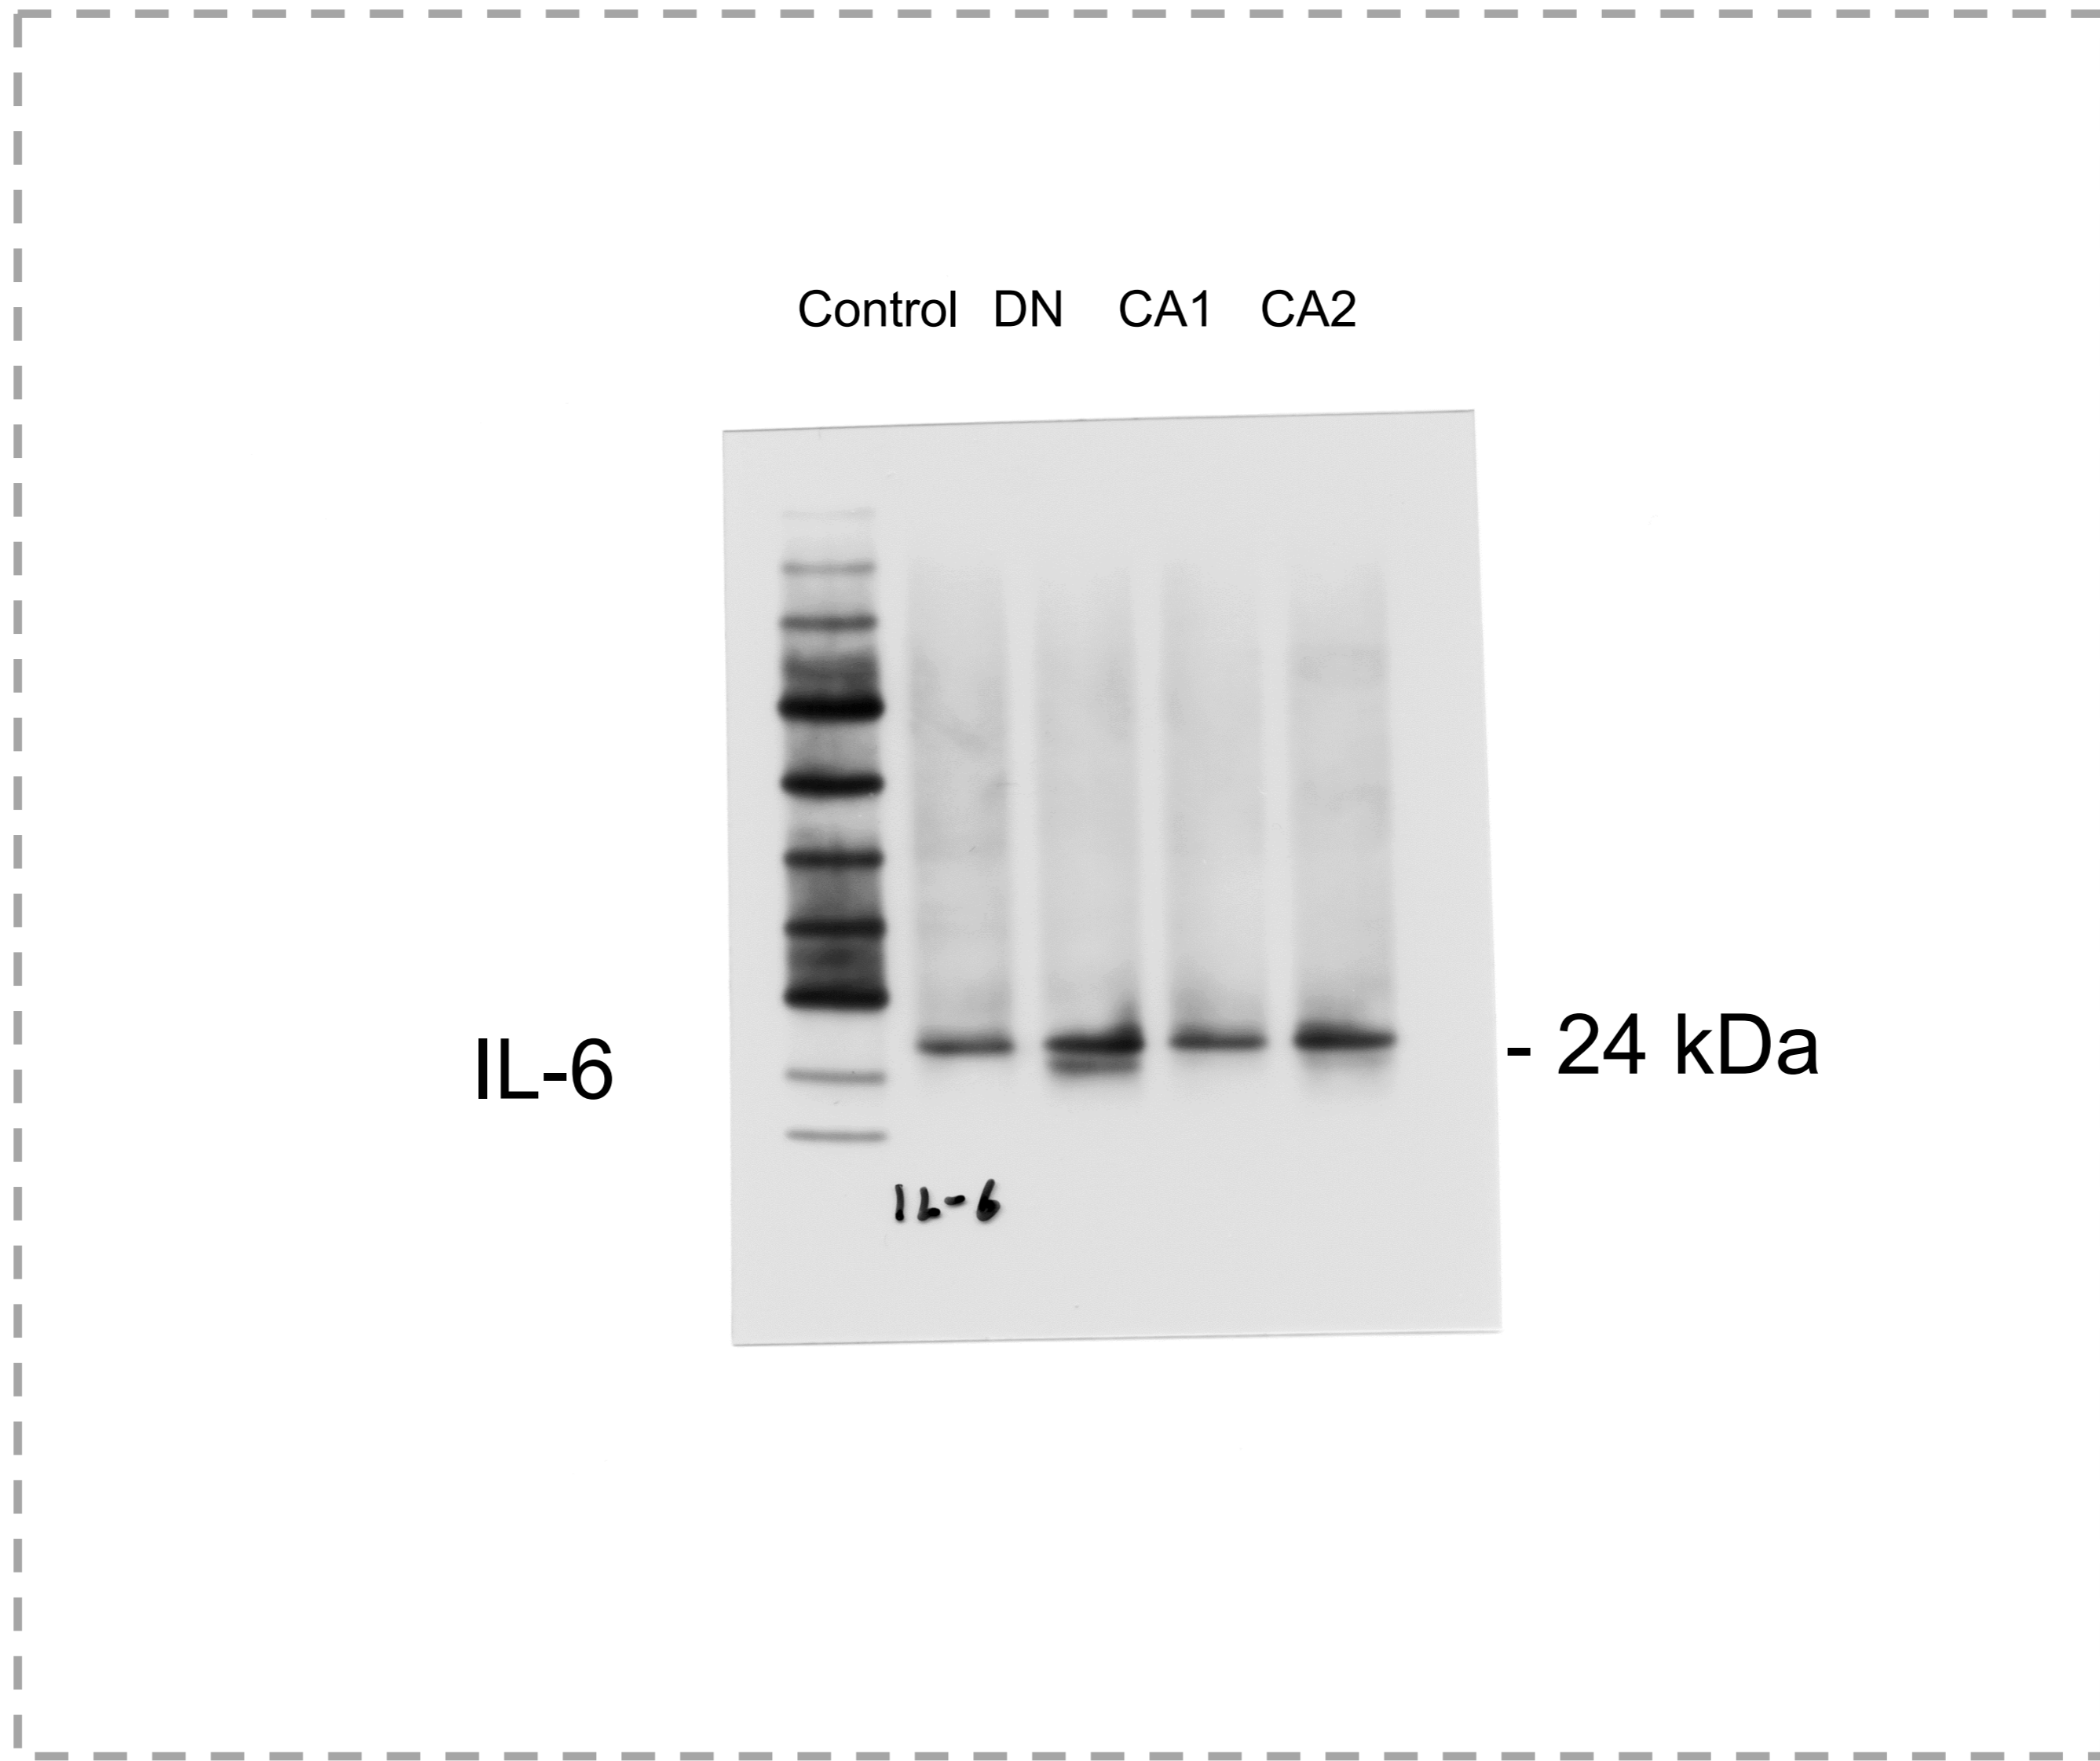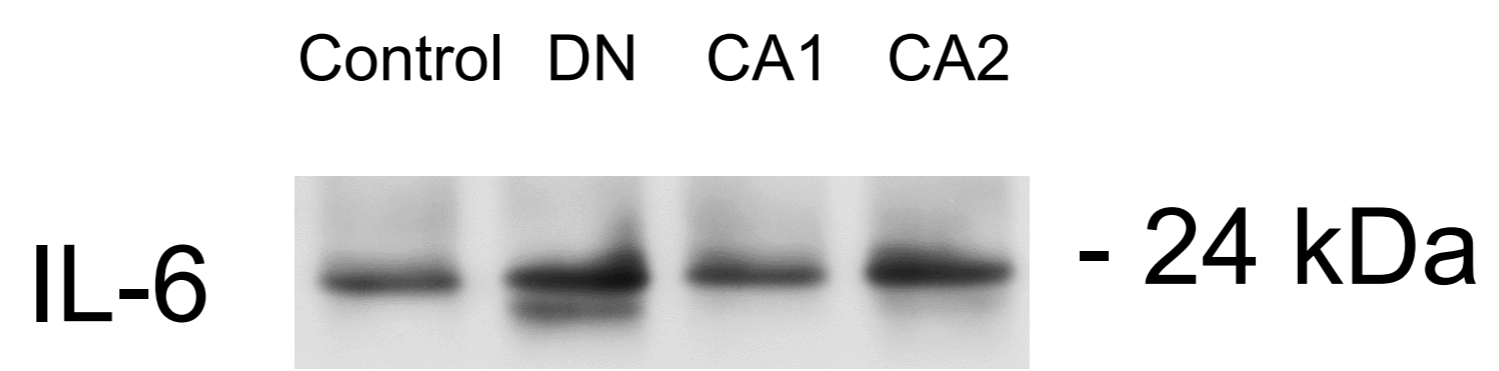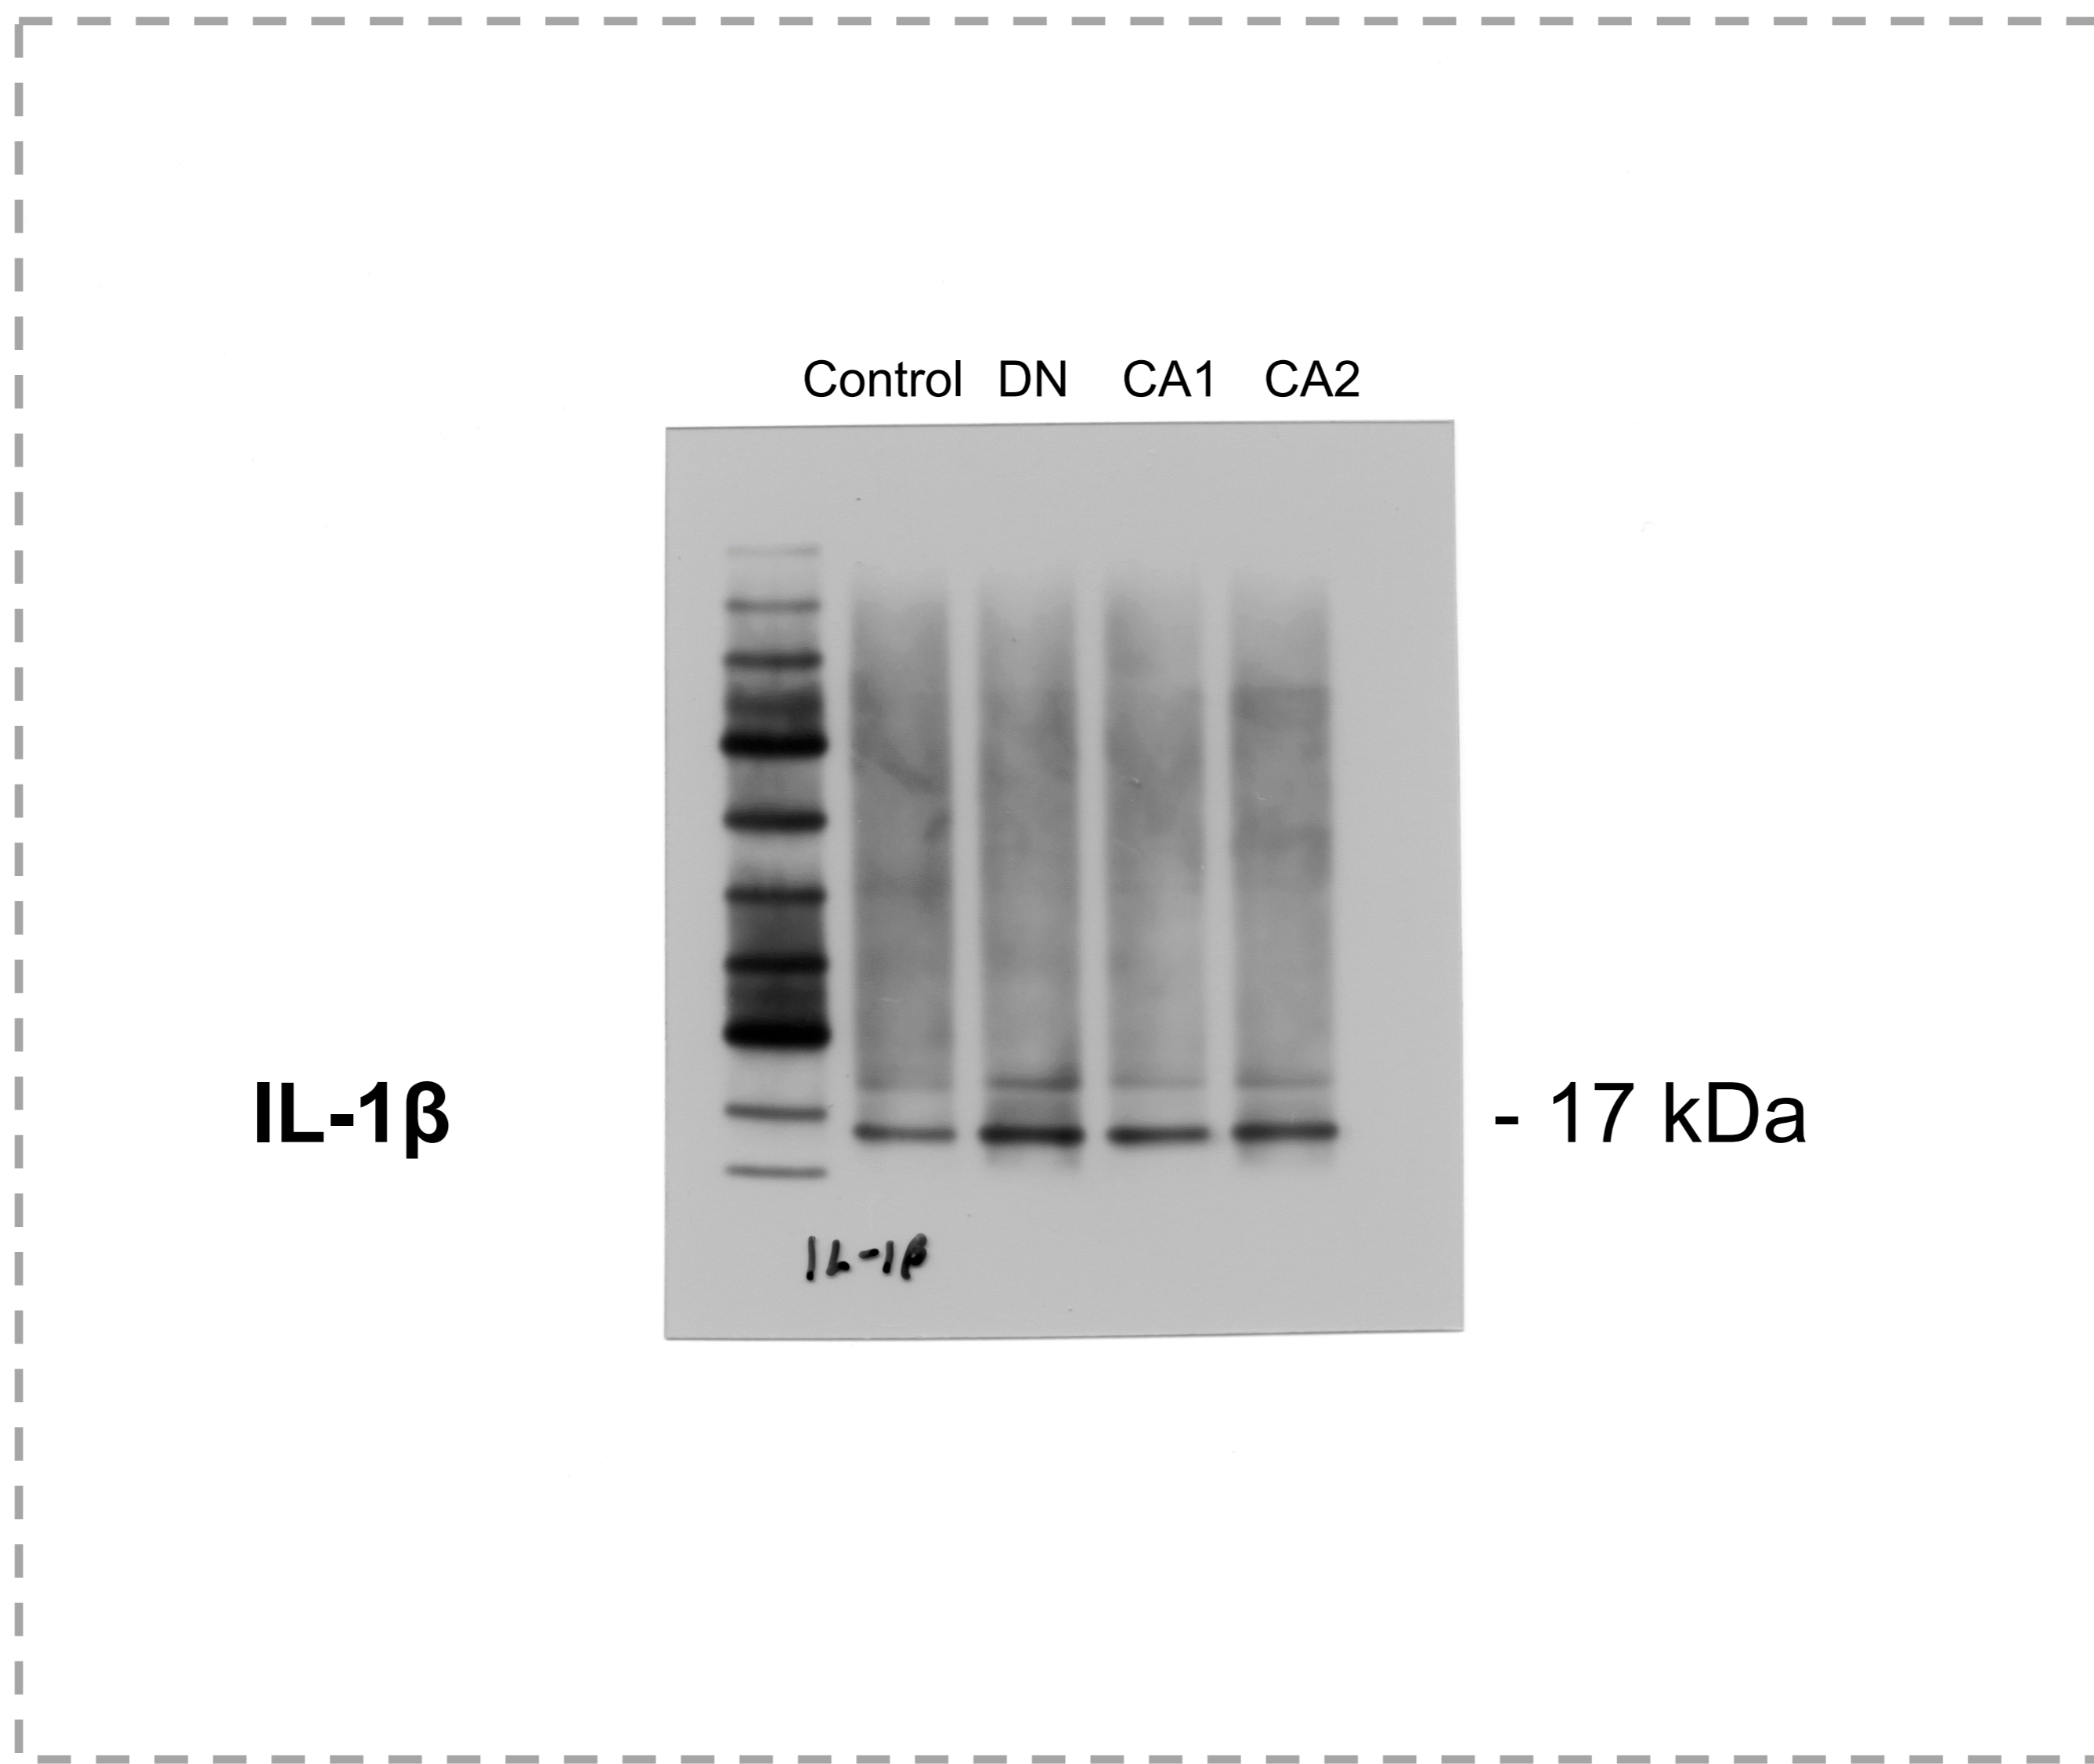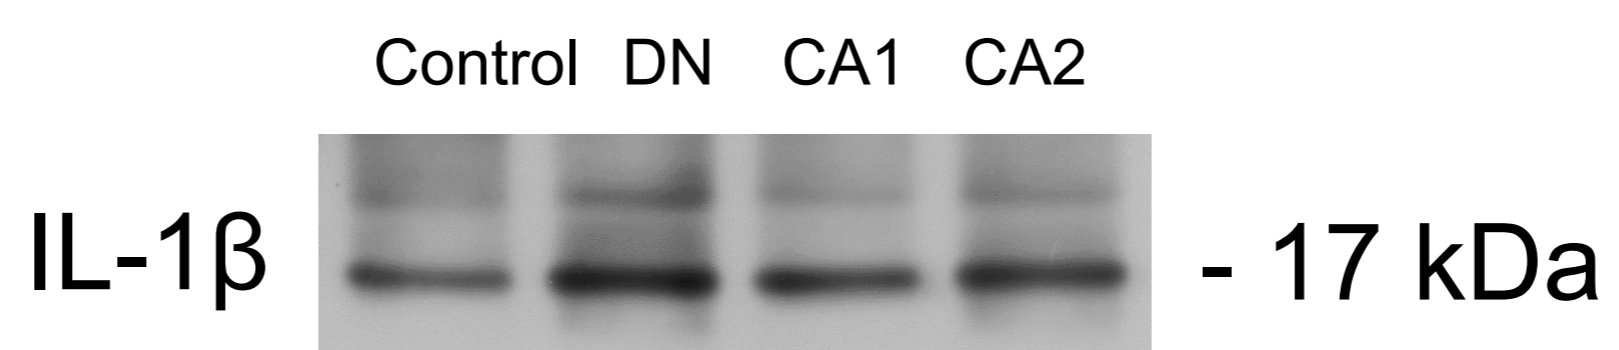

**Figure 7C**

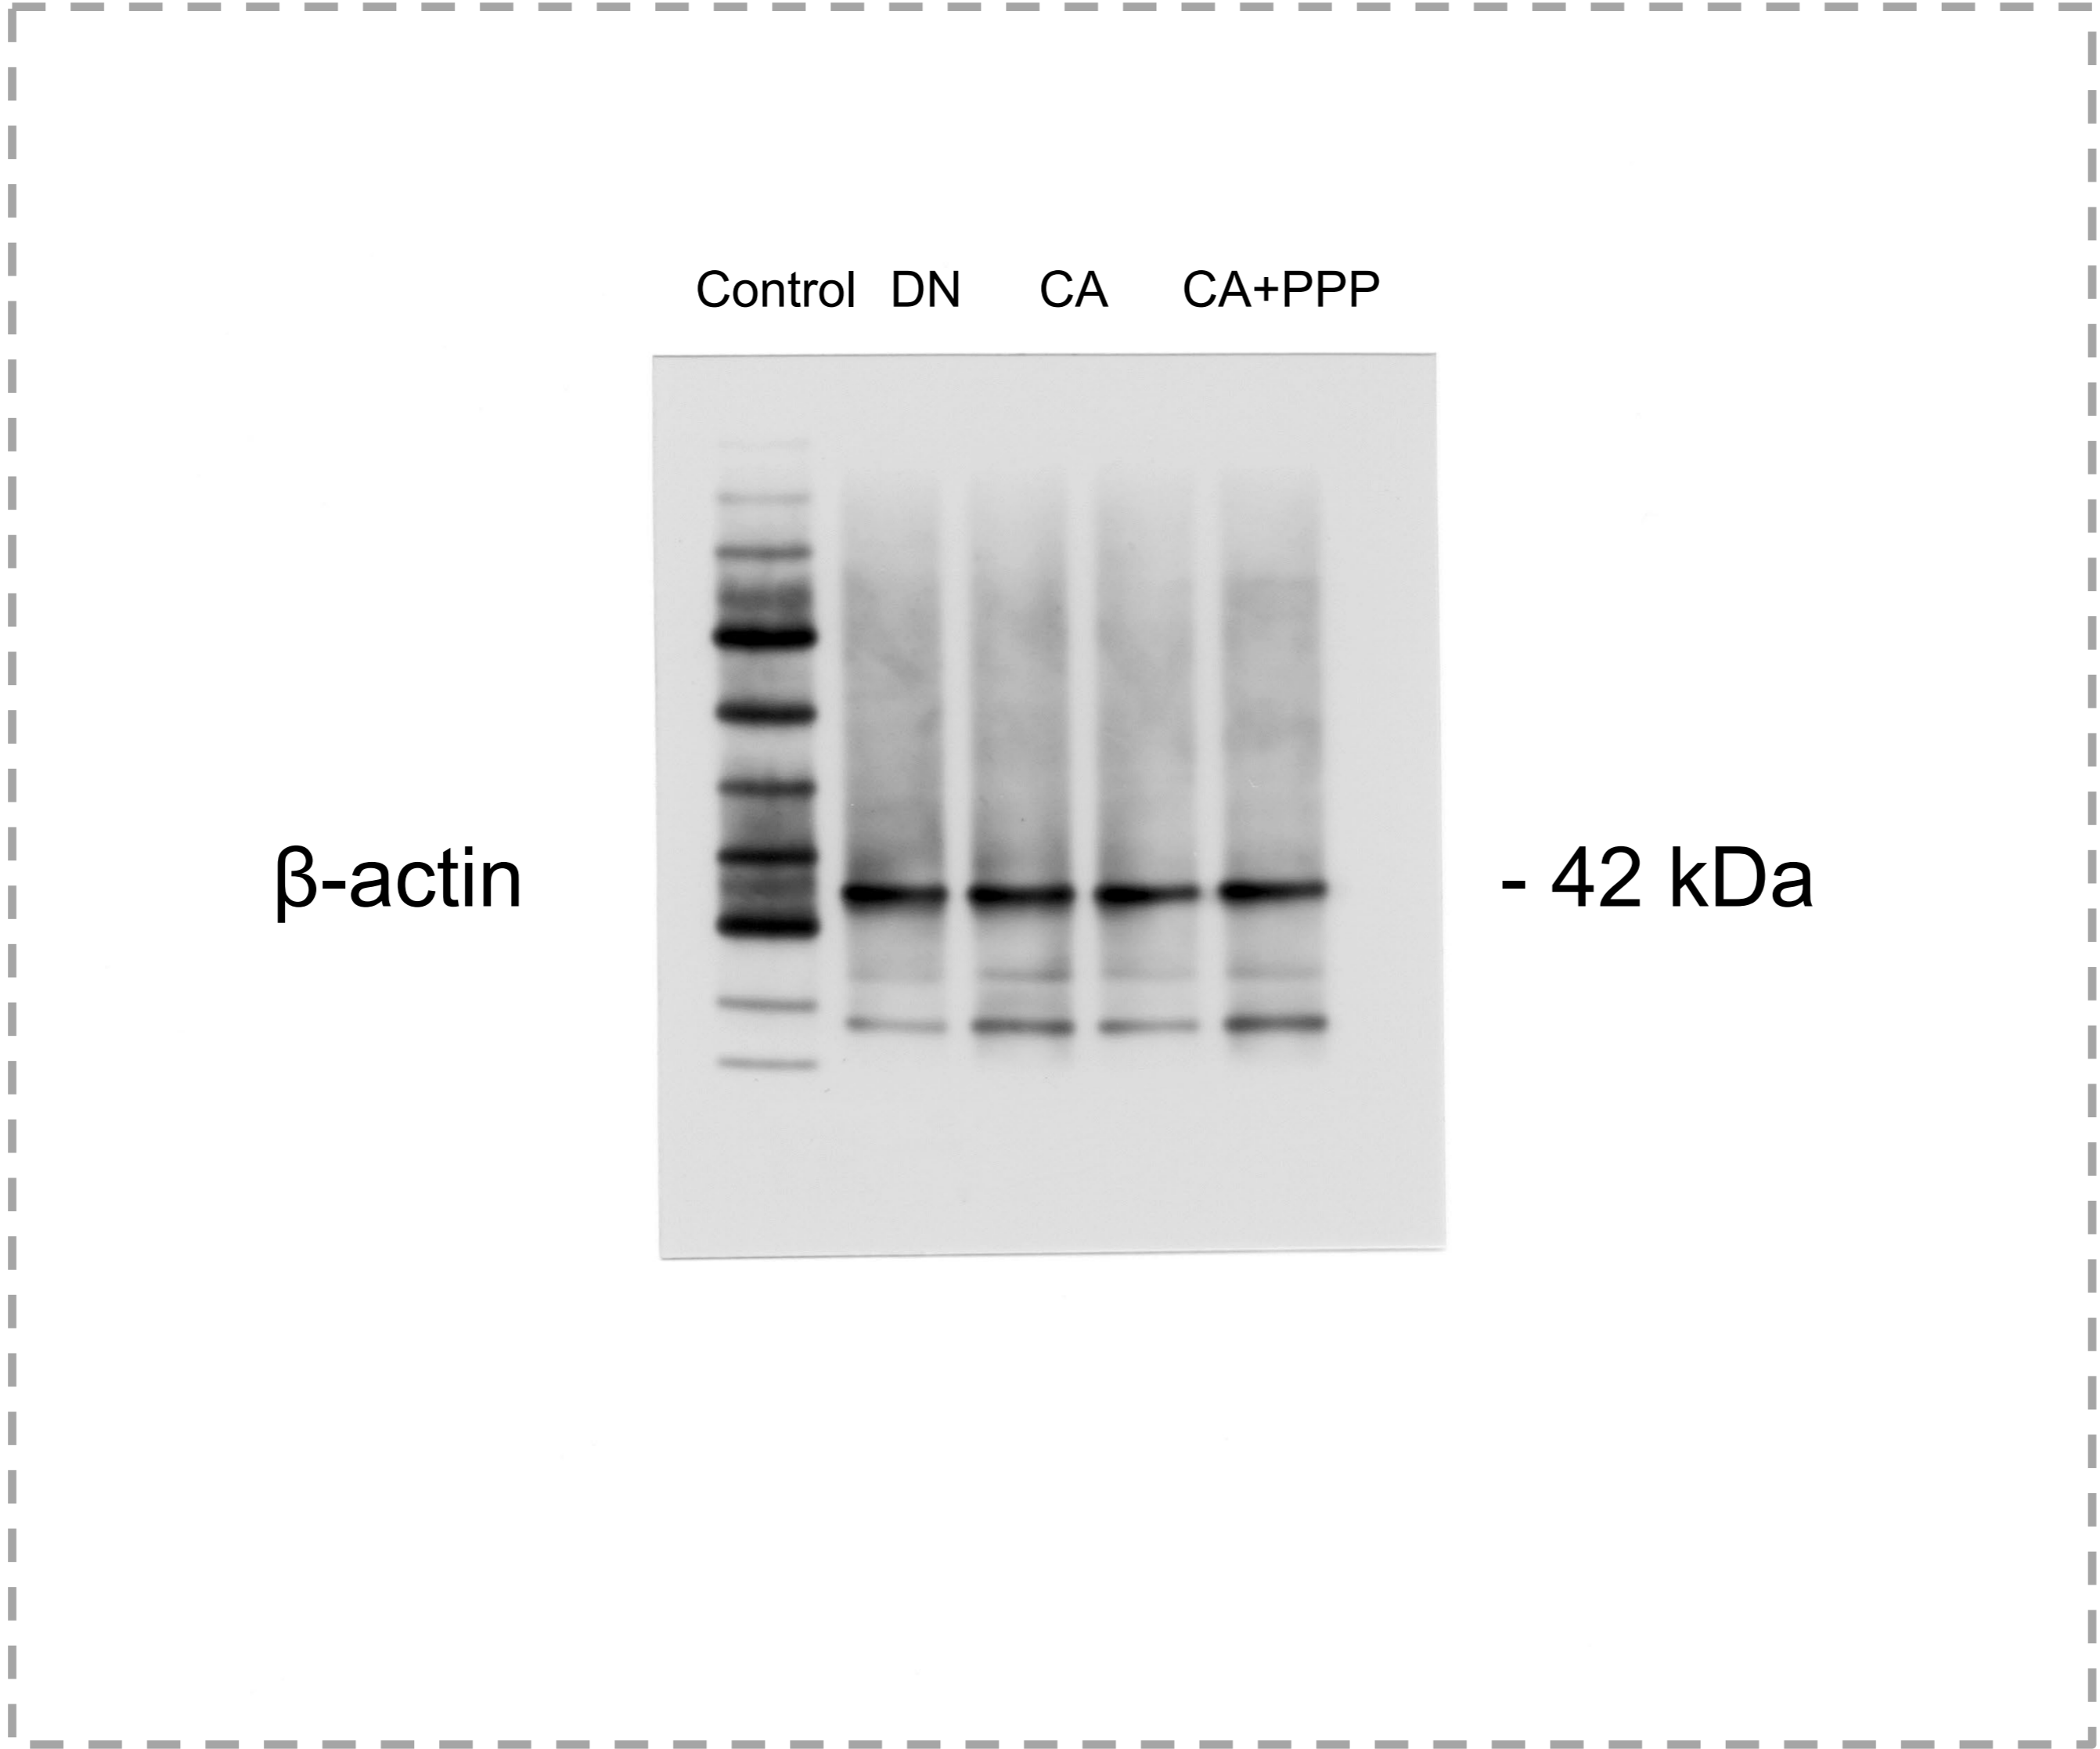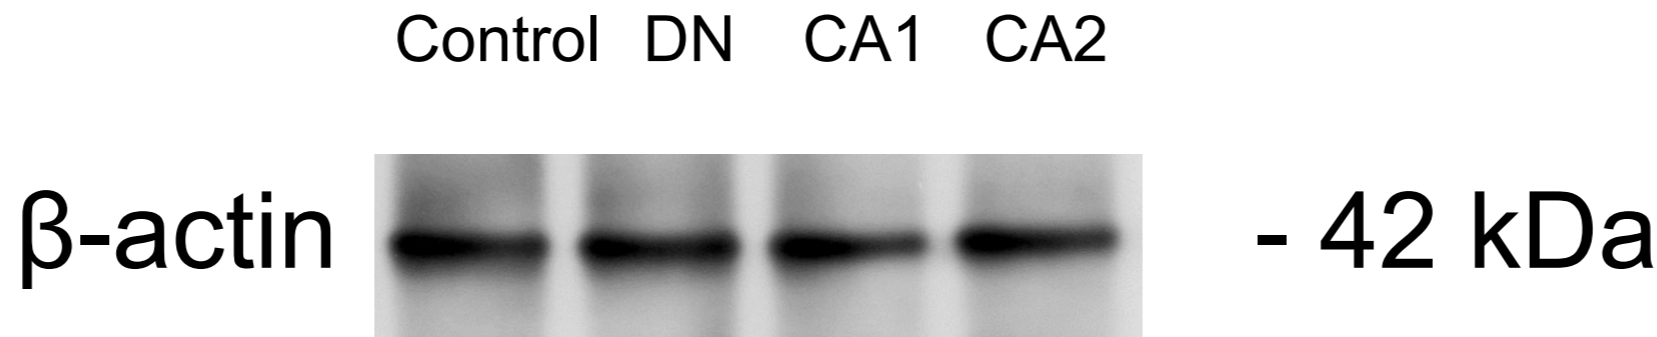

## Collection of western blot films

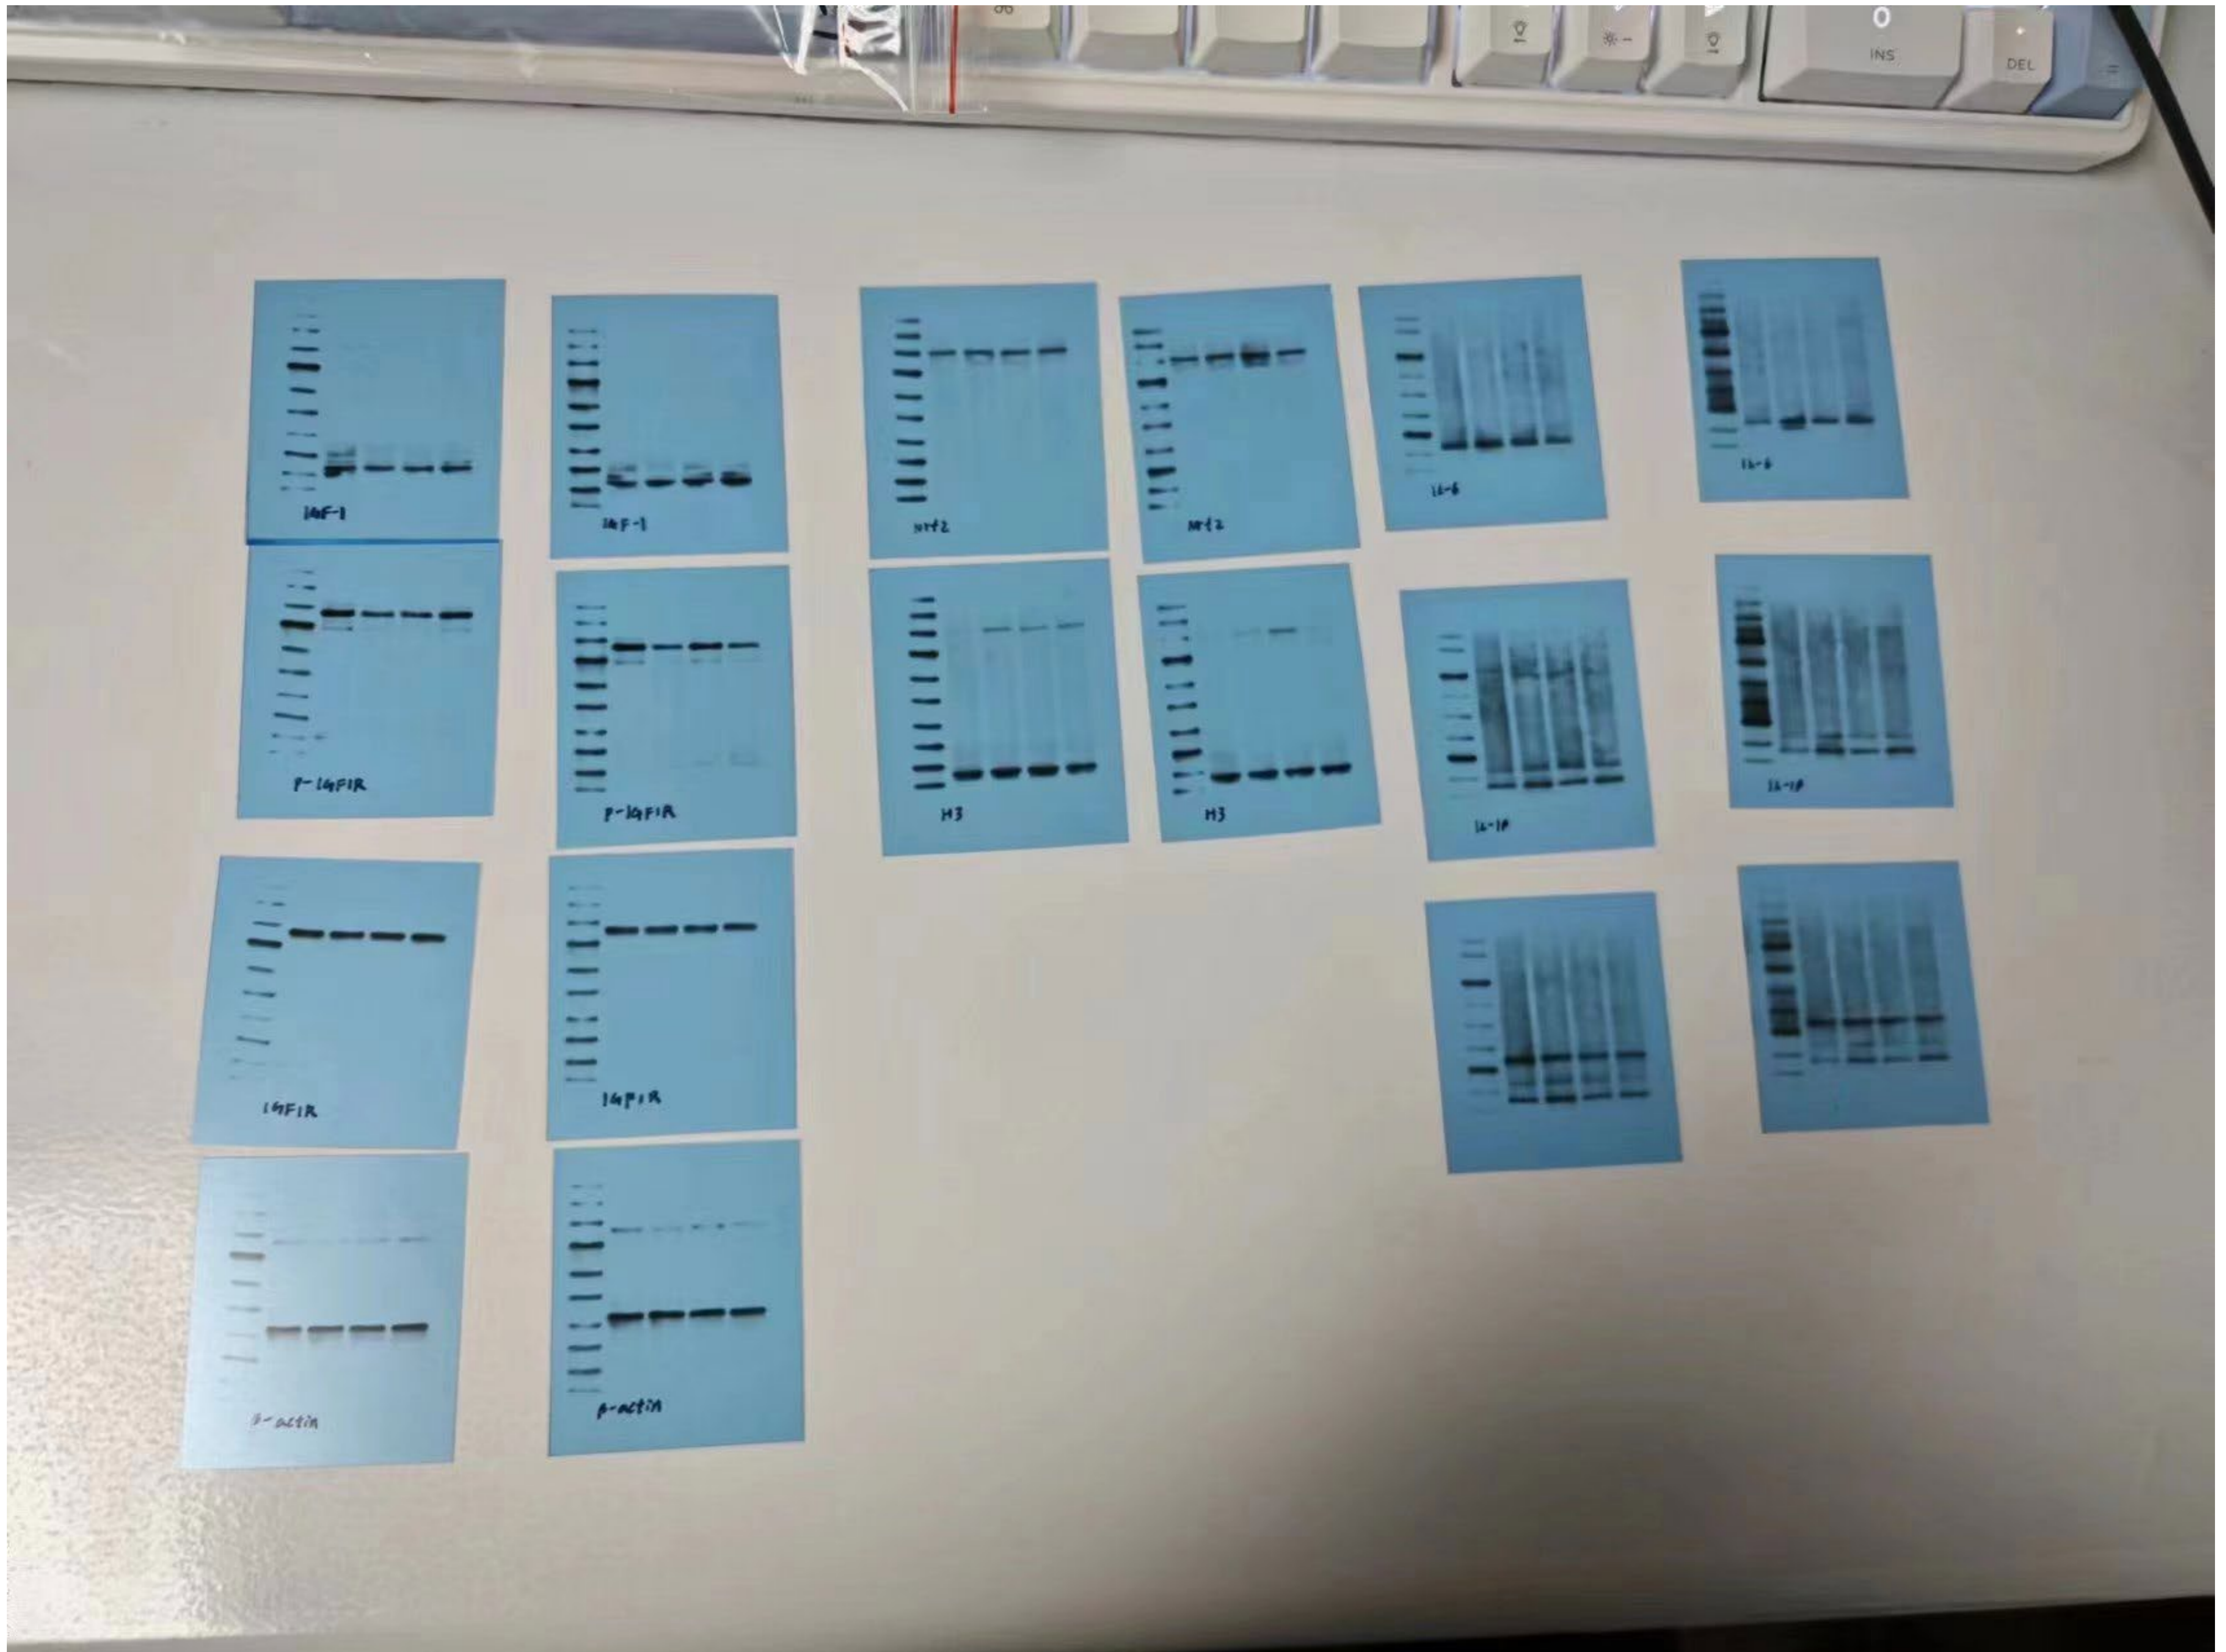

The collection above encompasses all blot images present in the manuscript. Each Western blot band is developed using film exposure. Following the development and drying of the film, the final Western blot images are captured using a scanner (Epson V550) set to "Black and White" mode.
